# Supplementary material for: Water mediated trapping of active methylene intermediates generated by IBX-induced oxidation of Baylis–Hillman adducts with nucleophiles
Source: Royal Society of Chemistry journal article supplement (doi:10.1039/c0gc00274g), 2010-01-01

## Water mediated trapping of active methylene intermediates generated by IBX-induced oxidation of Baylis-Hillman adducts with nucleophiles

Jia-Neng Tan,<sup>a</sup> Haoquan Li<sup>a</sup> and Yanlong Gu<sup>a, b\*</sup>

<sup>a</sup> Institute of Physical Chemistry and Industrial Catalysis, School of Chemistry and Chemical Engineering, Huazhong University of Science and Technology (HUST), 1037 Luoyu road, Hongshan District, Wuhan 430074, China. Fax: (0)86-(0)27-87 54 45 32.  
E-mail: klgyl@hust.edu.cn

<sup>b</sup> Hubei Key Laboratory of Material Chemistry and Service Failure, Huazhong University of Science and Technology, Wuhan, 430074, P R China.

### *Electronic Supporting Information*

#### **General Remarks:**

Tolualdehyde, 4-methoxybenzaldehyde, 4-chlorobenzaldehyde, 2-nitrobenzaldehyde, 4-trifluorobenzaldehyde, 3-phenylpropionaldehyde, thiophene-2-carboxaldehyde, 4-methylstyrene, 4-methoxystyrene, N-methyl-2-phenylindole, N-ethyl-2-phenylindole, 4-ethoxystyrene, 4-chlorostyrene, 4-fluoro- $\alpha$ -methylstyrene, 4-*tert*-butylstyrene, 4-chloro- $\alpha$ -methylstyrene, *n*-butyl vinyl ether, ethyl indole-2-carboxylate, ethyl benzoylacetate, ethyl 4-methoxybenzoylacetate, *tert*-butyl acrylate, cyclohexyl acrylate, and chloroform-*d* were purchased from Alfa Aesar Chemical Company. 2-ethylhexyl acrylate was obtained from TCI Chemical Company. Benzaldehyde,  $\alpha$ -methylstyrene, nitromethane, furfural, IBX, benzamide, acetonitrile, toluene, 1,2-dichloroethane, ethyl acetate, *n*-heptane and petroether were purchased from Shanghai Chemical Compony. <sup>1</sup>H and <sup>13</sup>C NMR spectra were recorded on a Bruker AV-400. Chemical shifts are expressed in ppm relative to Me<sub>4</sub>Si in CDCl<sub>3</sub>. IR spectra were recorded on a FT-IR Bruker (VERTEX 70) using KBr technology. Elemental analysis was measured on a Vario Micro Cube (Elementar) Instrument. Baylis-Hillman adducts were prepared according to reported methods.<sup>1,2</sup> Ionic liquid, [BMIm]BF<sub>4</sub>, was synthesized according to our previous method.<sup>3</sup>

**A typical procedure for IBX-induced oxidative *oxo* Diels-Alder reaction of Baylis-Hillman adducts with olefins:** all reactions were conducted in a 10 mL of V-type flask equipped with triangle magnetic stirring. In a typical reaction, water (1.0 g) was mixed with **2a** (52 mg, 0.39 mmol), **1a** (62 mg, 0.30 mmol) and IBX (109 mg, 0.39 mmol) under air. The mixture was stirred for 3 hours at 90 °C. After reaction, the mixture was extracted with ethyl acetate (2 mL  $\times$  3). The obtained ester phases were then combined together and concentrated under reduced pressure. The product was obtained by preparation TLC using a mixed solution of ethyl acetate and petro ether as eluting solvent (normally, the ratio of ethyl acetate/petroether is 1/10). The generated 2-iodobenzoic acid could be recovered by filtration and regenerated by a known method.

**A typical procedure for IBX-induced oxidative Michael reaction of Baylis-Hillman adducts with 1,3-dicarbonyl compounds:** all reactions were conducted in a 10 mL of V-type flask

equipped with triangle magnetic stirring. In a typical reaction, water (1.0 g) was mixed with **4a** (75.0 mg, 0.36 mmol), **1a** (62.0 mg, 0.30 mmol) and IBX (101.0 mg, 0.36 mmol) under air. The mixture was stirred for 3 hours at 90 °C. After reaction, the mixture was extracted with ethyl acetate (2 mL × 3). The obtained ester phases were then combined together and concentrated under reduced pressure. The product was obtained by preparation TLC using a mixed solution of ethyl acetate and petro ether as eluting solvent (normally, the ratio of ethyl acetate/petroether is 1/6).

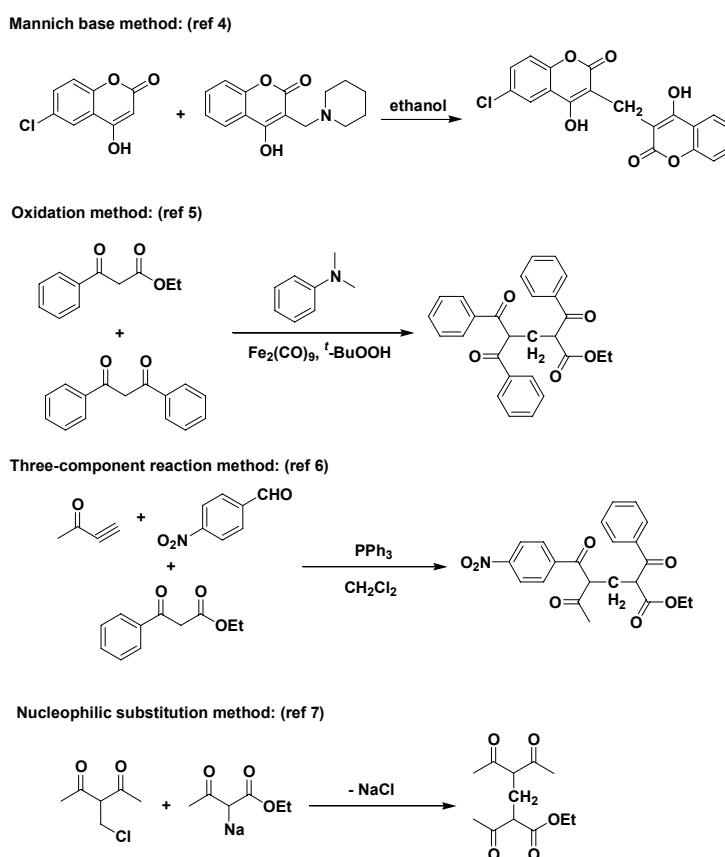

**Scheme S1.** Previous method to access skeleton of **5a**-type axial-asymmetric polycarbonyl compounds.

**A typical procedure for IBX-induced oxidative Michael reaction of Baylis-Hillman adducts with less-reactive indole:** all reactions were conducted in a 10 mL of V-type flask equipped with triangle magnetic stirring. In a typical reaction, water (1.0 g) was mixed with **1a** (61.8 mg, 0.30 mmol), **6a** (62.4 mg, 0.33 mmol) and IBX (101.0 mg, 0.36 mmol) under air. The mixture was stirred for 10 hours at 90 °C. After reaction, the mixture was extracted with ethyl acetate (2 mL × 3). The obtained ester phases were then combined together and concentrated under reduced pressure. The product was obtained by preparation TLC using a mixed solution of ethyl acetate and petro ether as eluting solvent (normally, the ratio of ethyl acetate/petroether is 1/6).

**A typical procedure for IBX-induced oxidative aza-Michael reaction of Baylis-Hillman adduct **1a** with benzamide:** the reactions was conducted in a 10 mL of V-type flask equipped with triangle magnetic stirring. In the beginning of the reaction, water (1.0 g) was mixed with **1a** (61.8 mg, 0.30 mmol), **8a** (39.9 mg, 0.33 mmol) and IBX (101.0 mg, 0.36 mmol) under air. The

mixture was stirred for 4 hours at 90 °C. After reaction, the mixture was extracted with ethyl acetate (2 mL × 3). The obtained ester phases were then combined together and concentrated under reduced pressure. The product was obtained by preparation TLC using a mixed solution of ethyl acetate and petro ether as eluting solvent (the ratio of ethyl acetate/petroether is 1/4).

### References

1. V. K. Aggarwal, A. Mereu, *Chem. Commun.* **1999**, 2311-2312
2. Y. Song, H. Ke, N. Wang, L. Wang, G. Zou, *Tetrahedron*, **2009**, *65*, 9086-9090.
3. Y. Gu, F. Shi, Y. Deng, *J. Org. Chem.* **2004**, *69*, 391-394.
4. (a) R. A. Abramovitch, J. R. Gear, *Can. J. Chem.* **1958**, *36*, 1501-1510; (b) D. Molho, C. Mentzer, *Compt. rend.* **1959**, *248*, 1344-1347.
5. H. Li, Z. He, X. Guo, W. Li, X. Zhao, Z. Li, *Org. Lett.* **2009**, *11*, 4176-4179.
6. S. Xue, Q. -F. Zhou, L. -Z. Li, Q. -X. Guo, *Synlett* **2005**, (19) 2990-2992.
7. J. L. Simonsen, R. Storey, *Proceedings of the Chemical Society*, London, **1910**, *25*, 290.

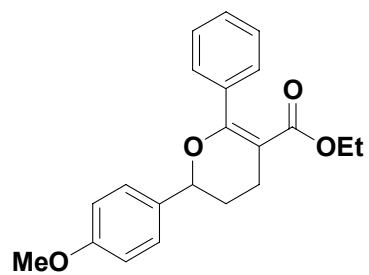

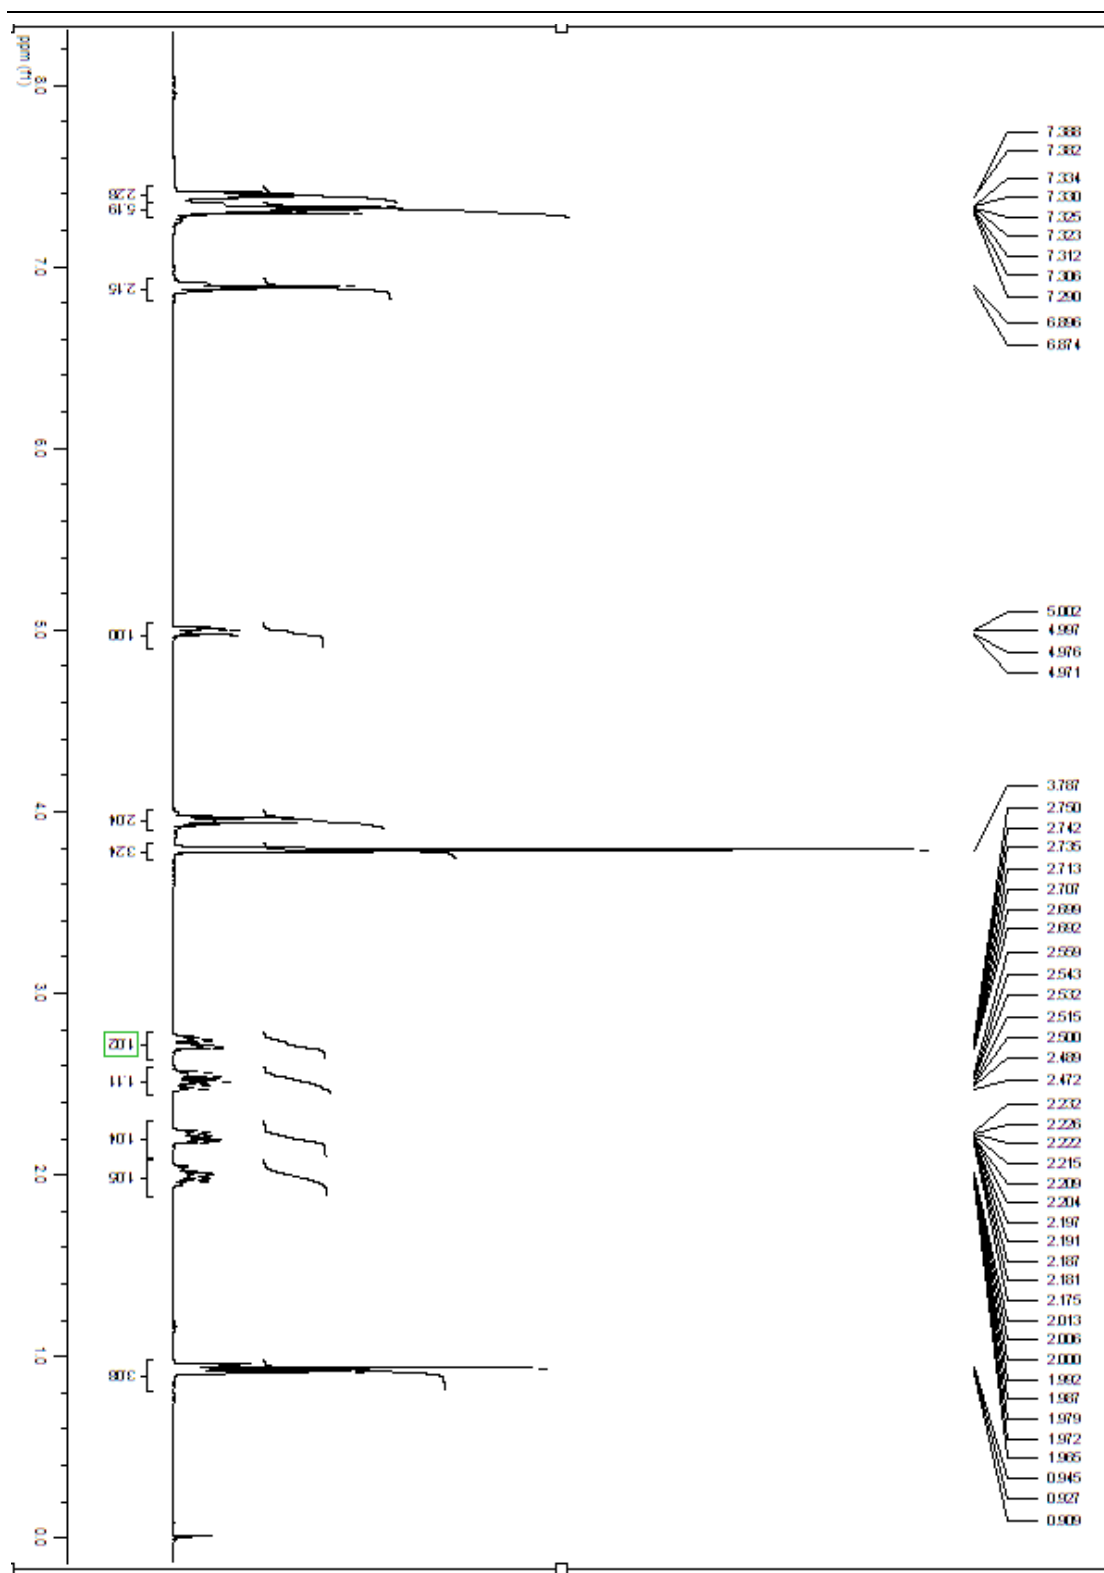

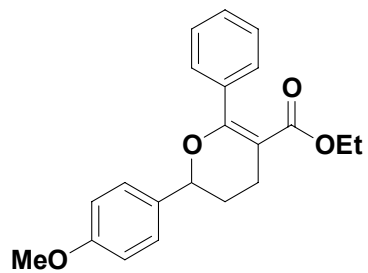

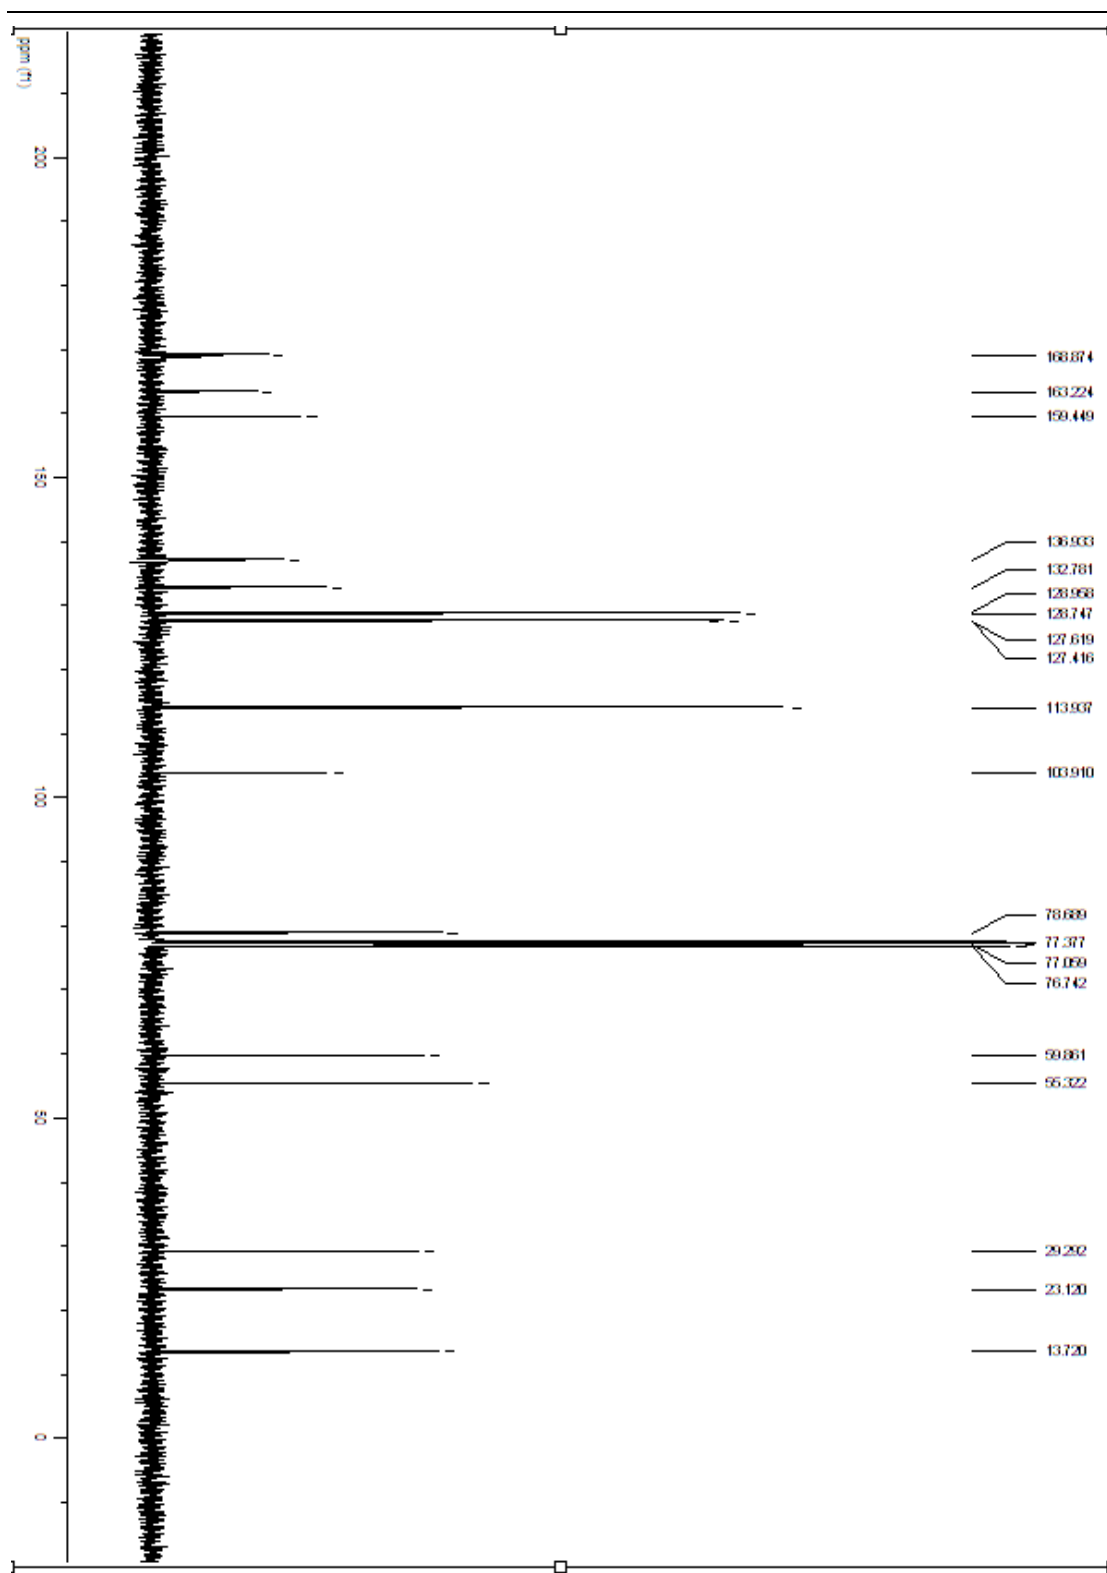

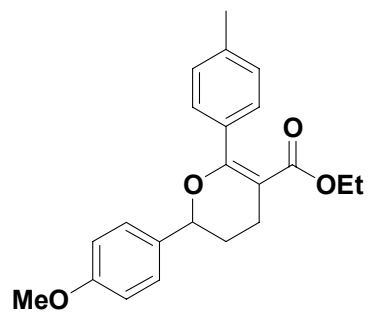



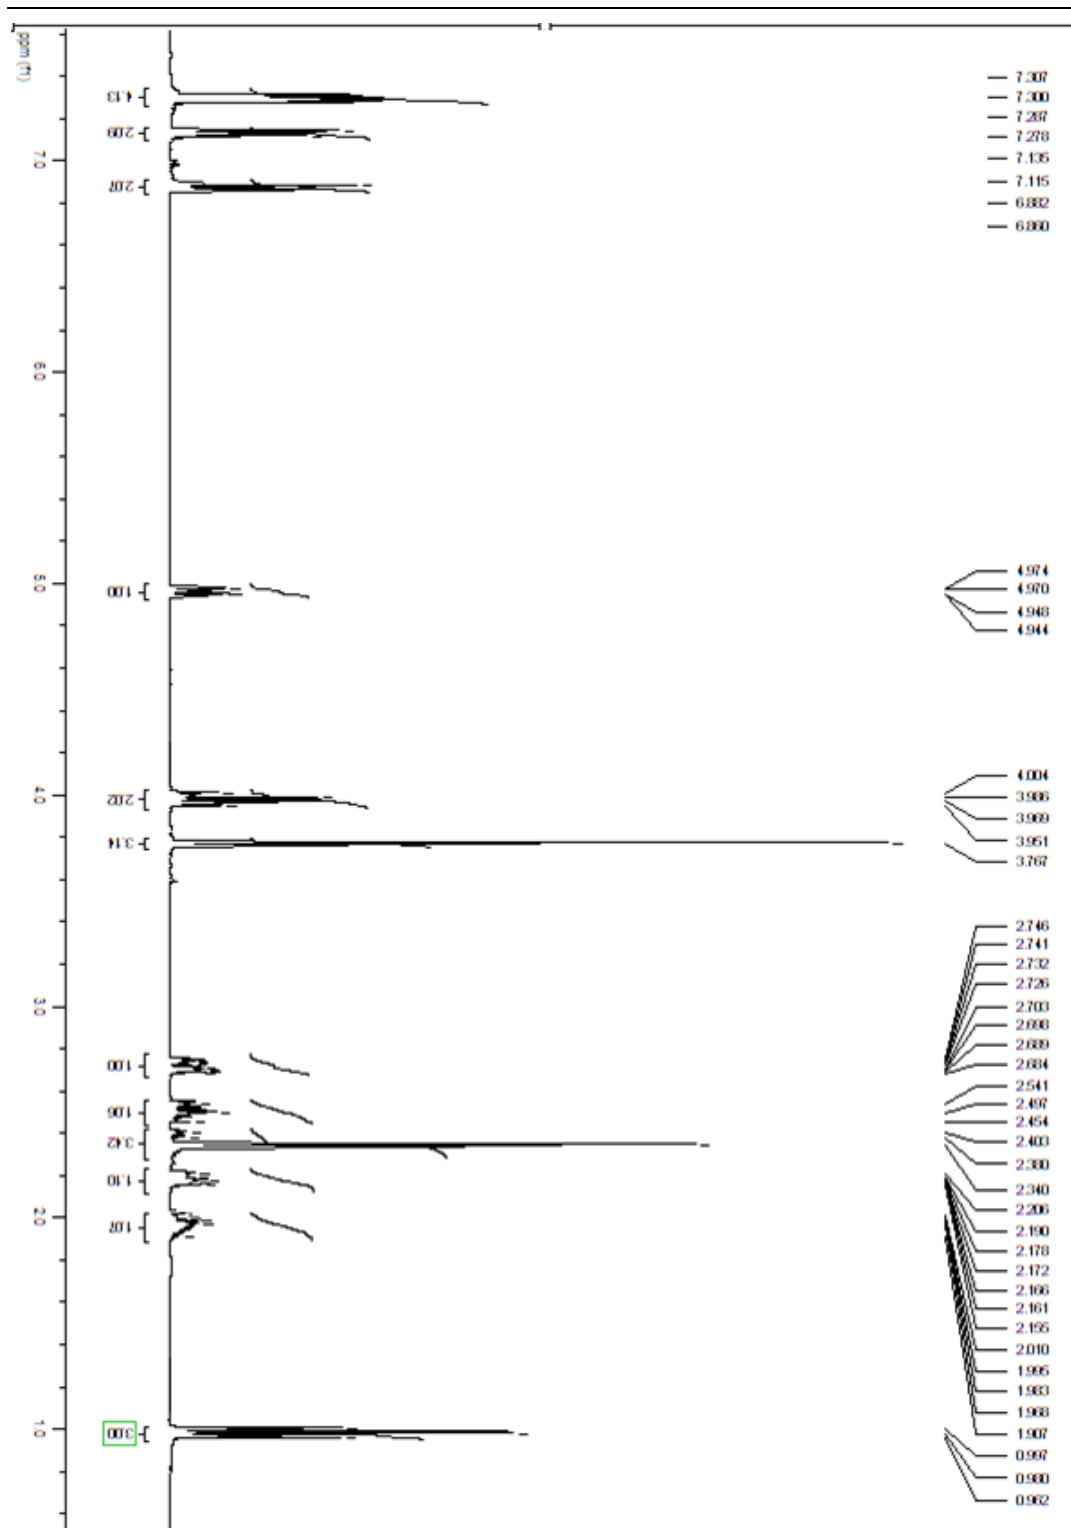



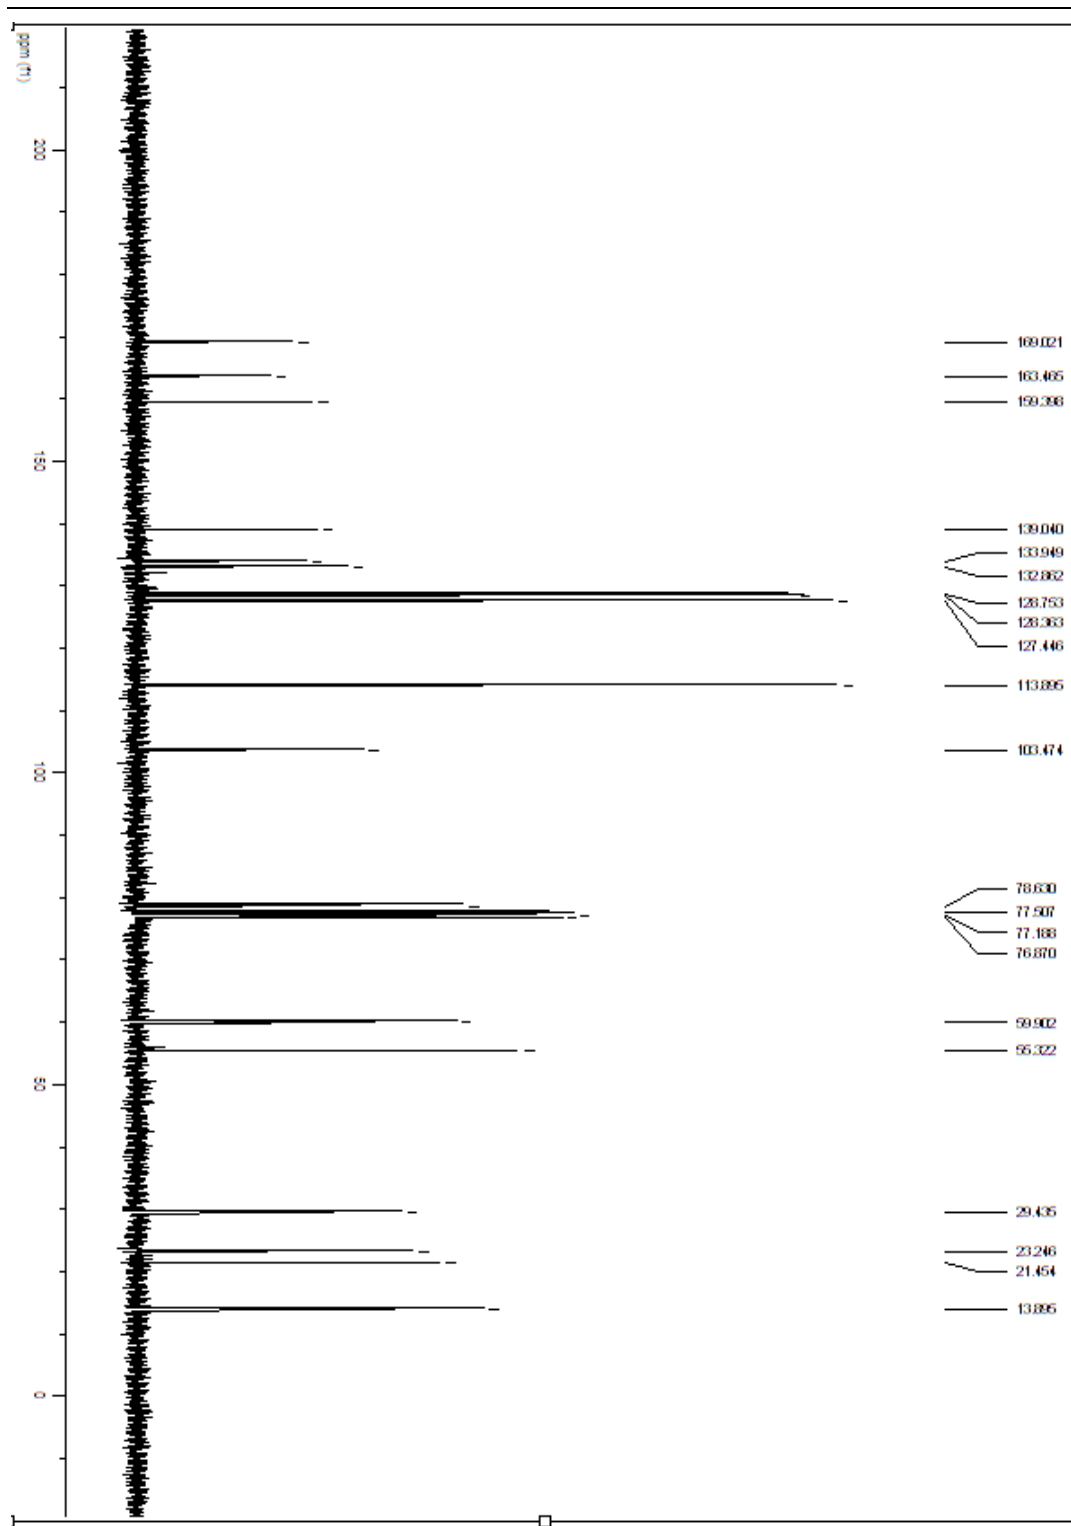

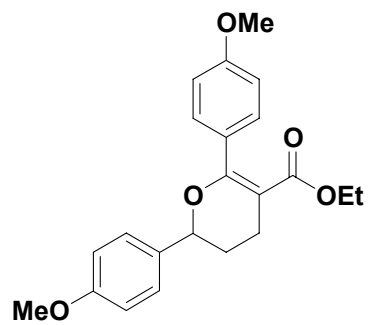





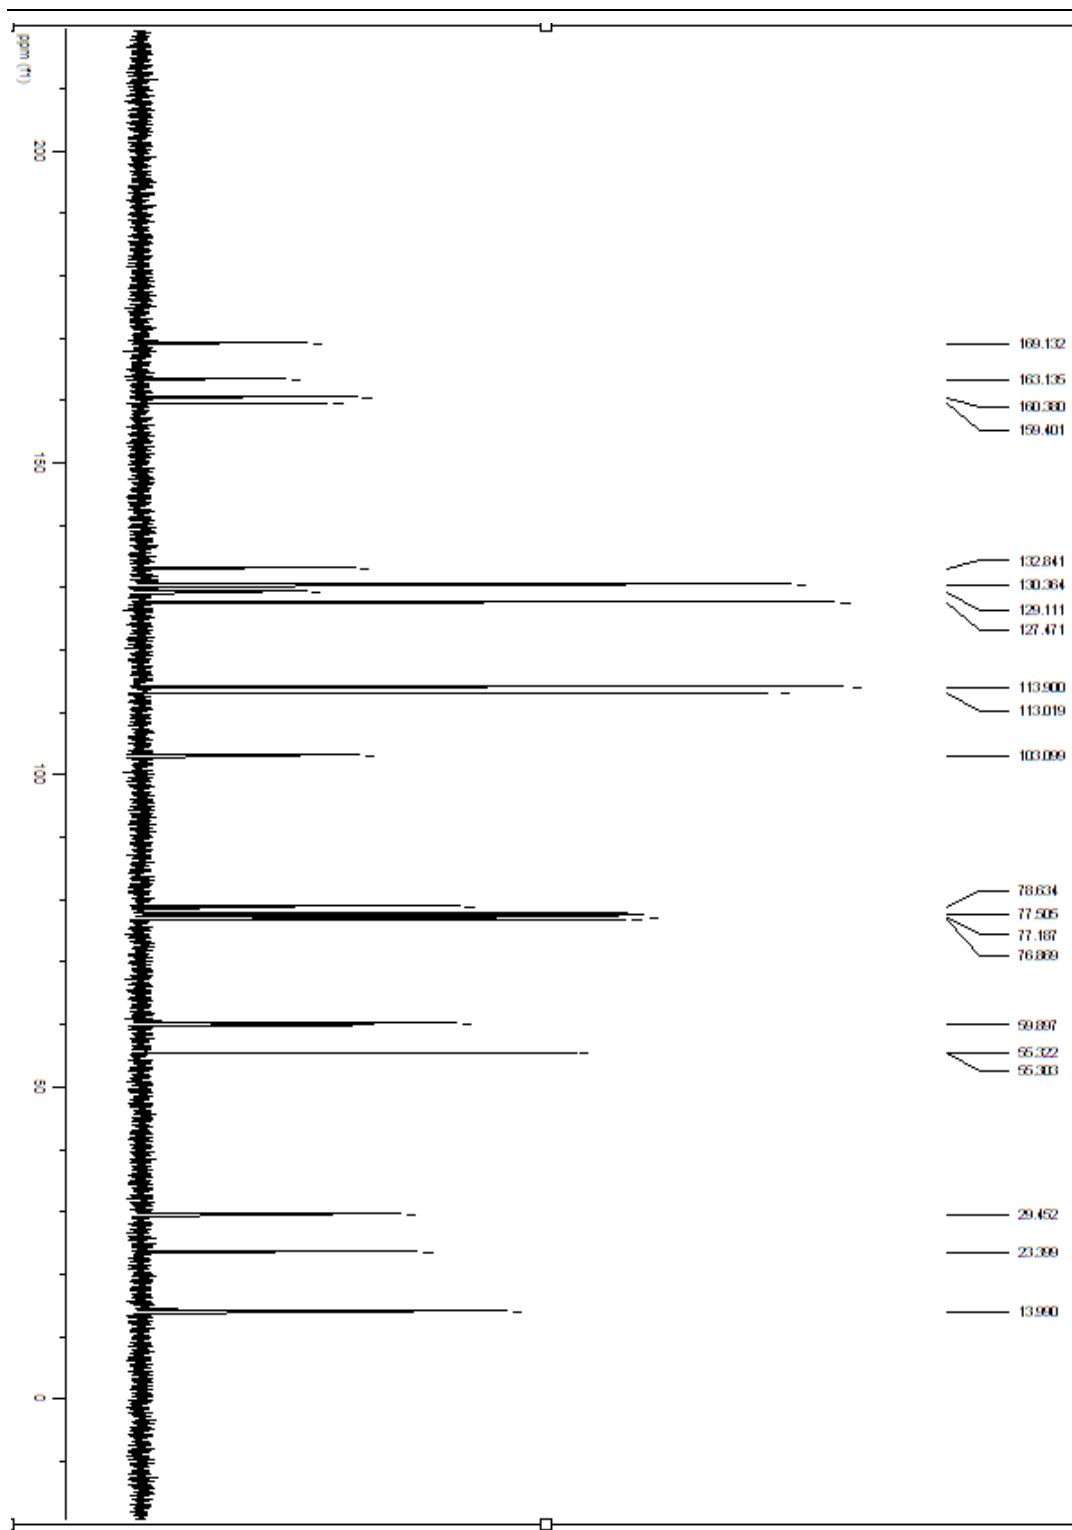

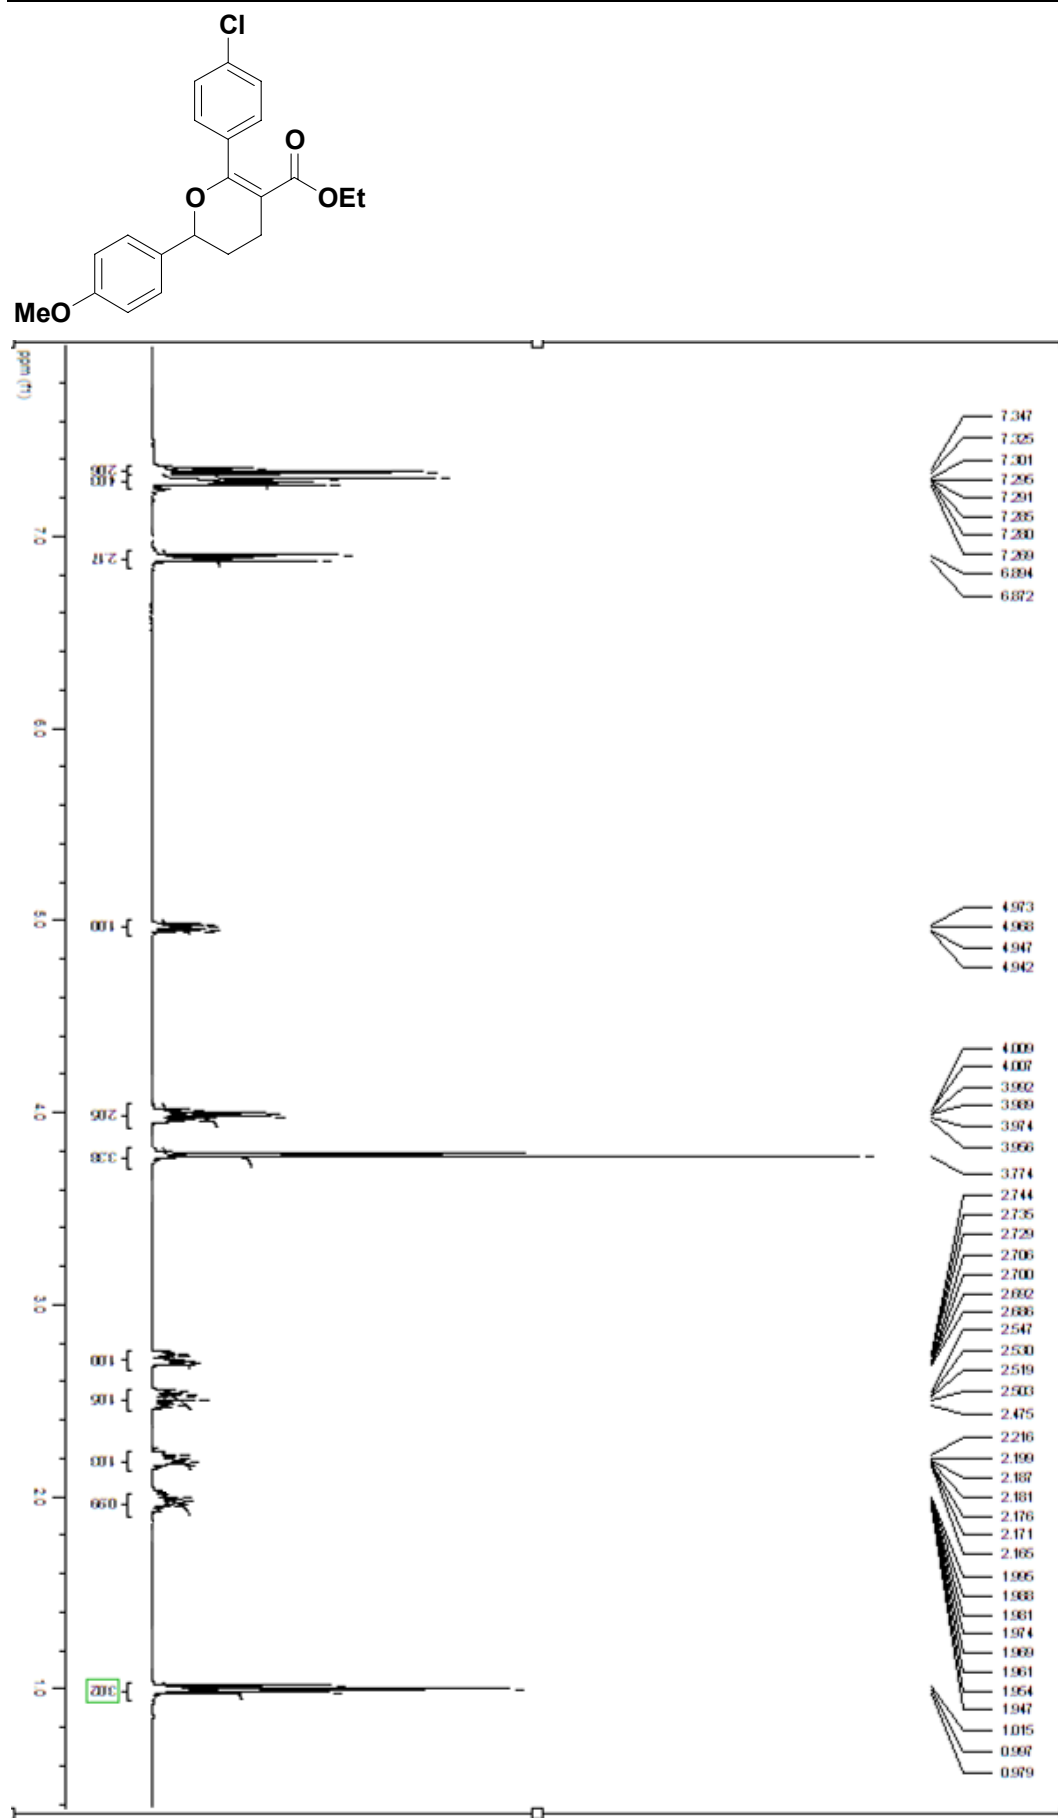



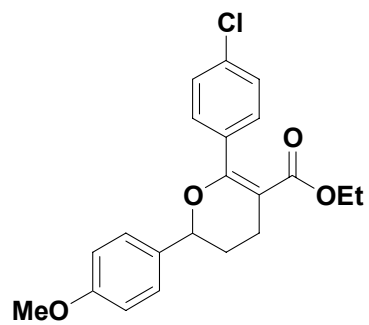

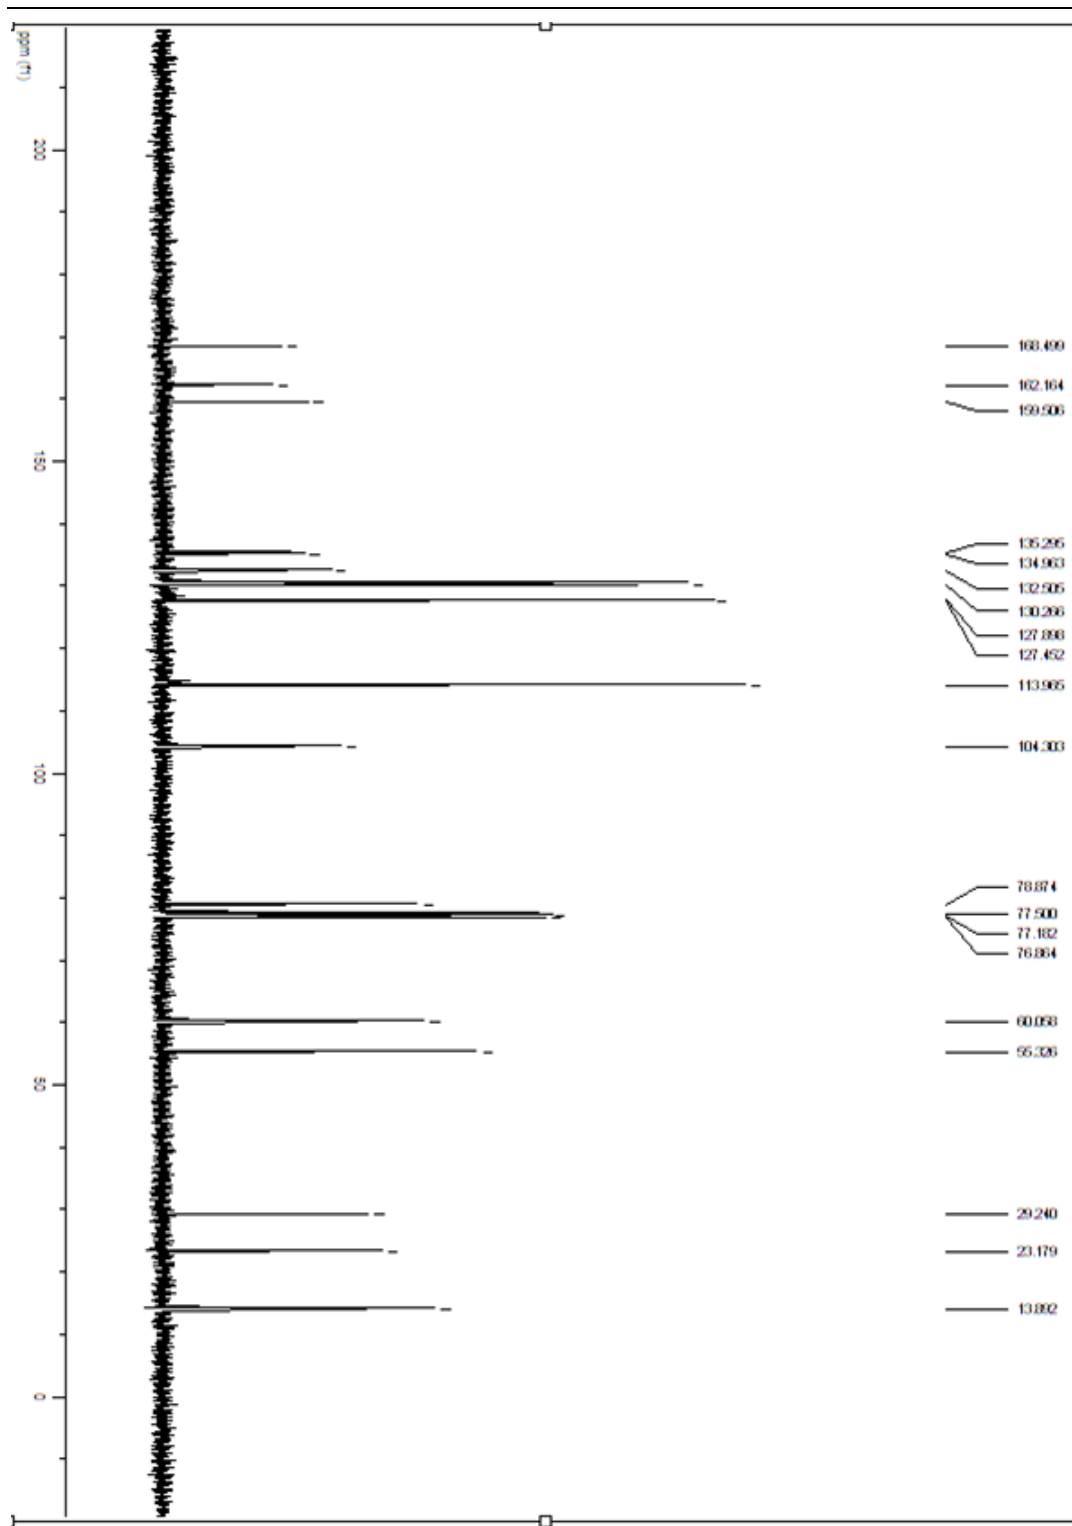

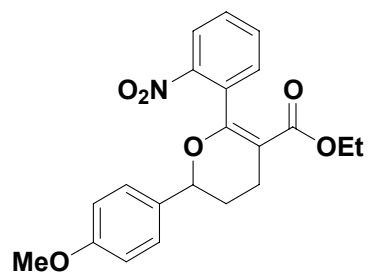

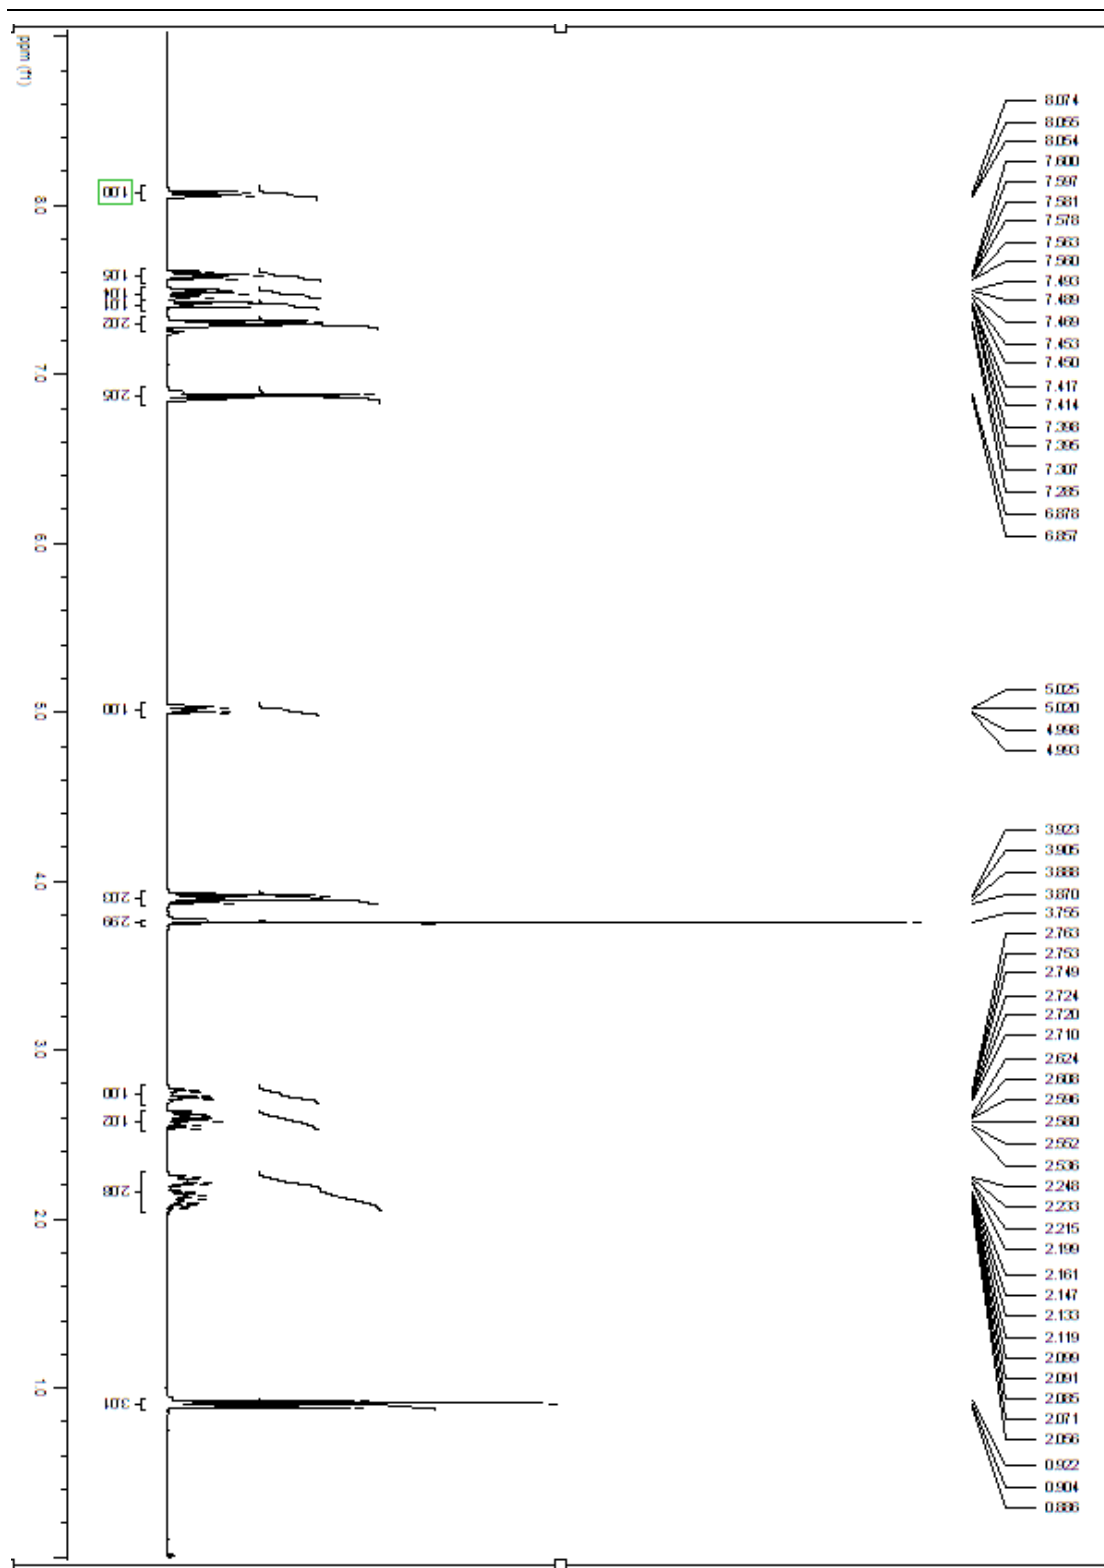



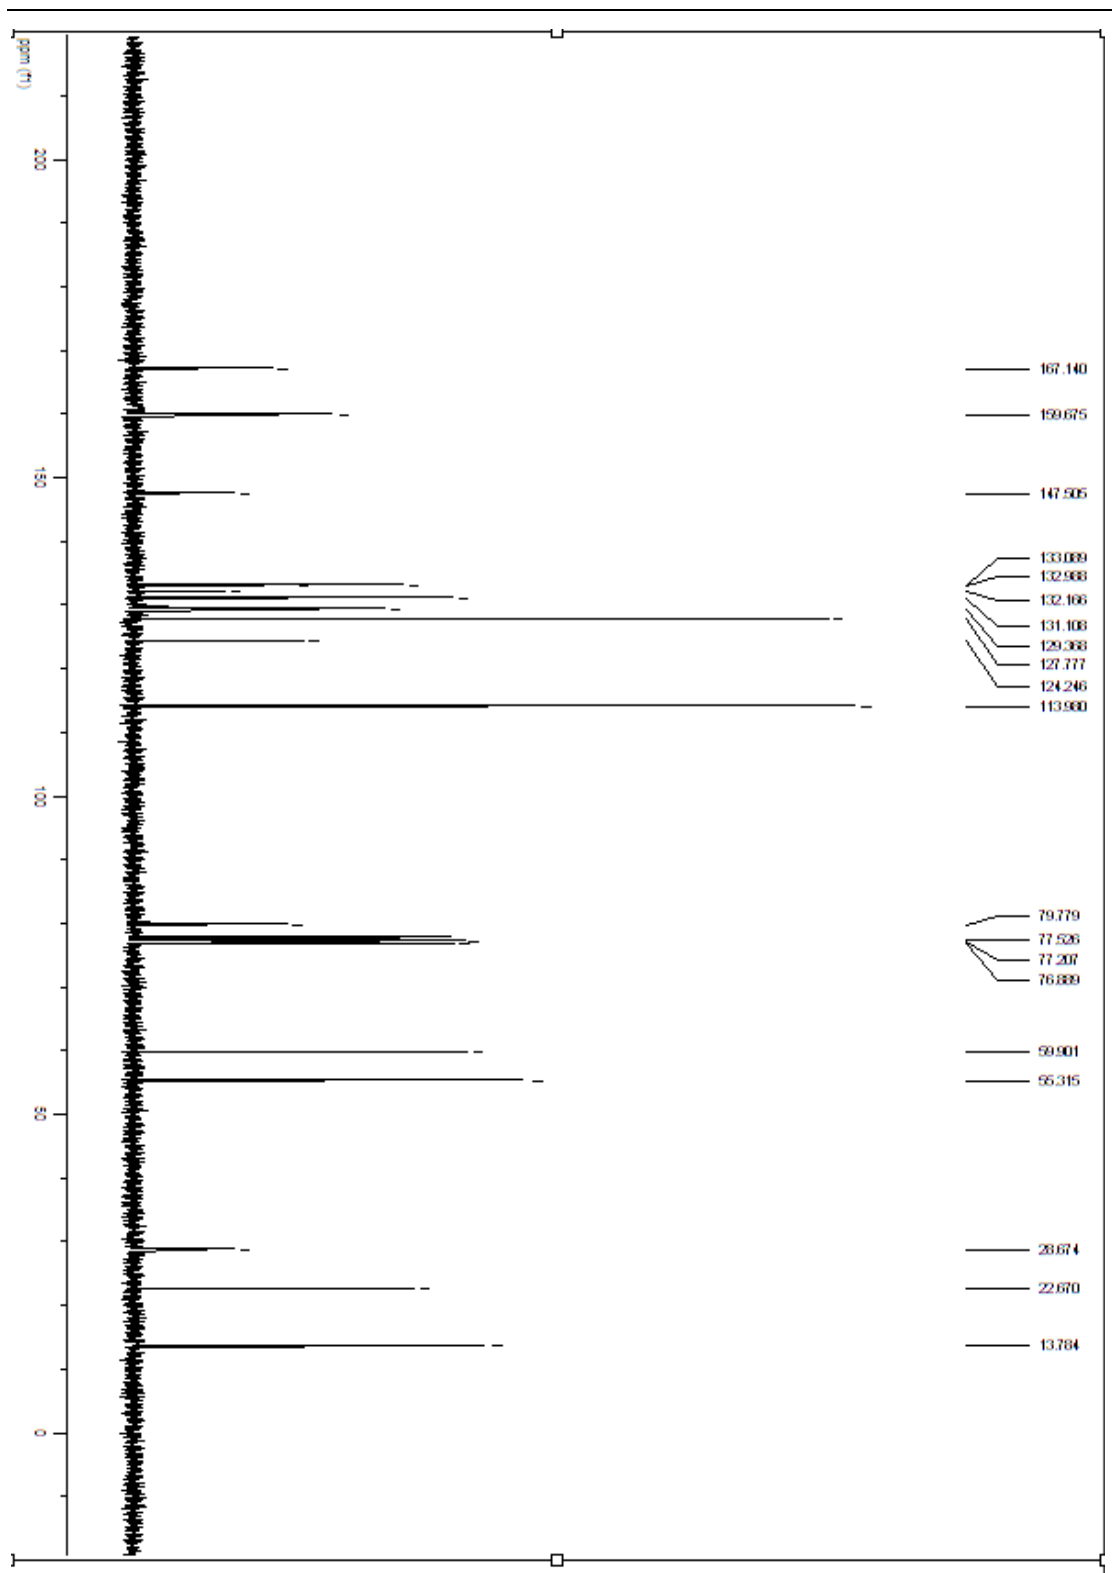

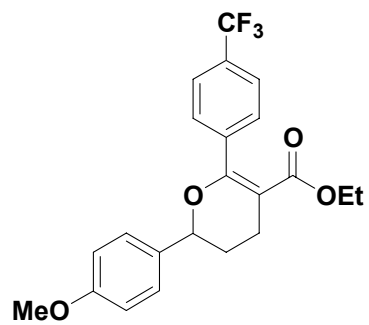

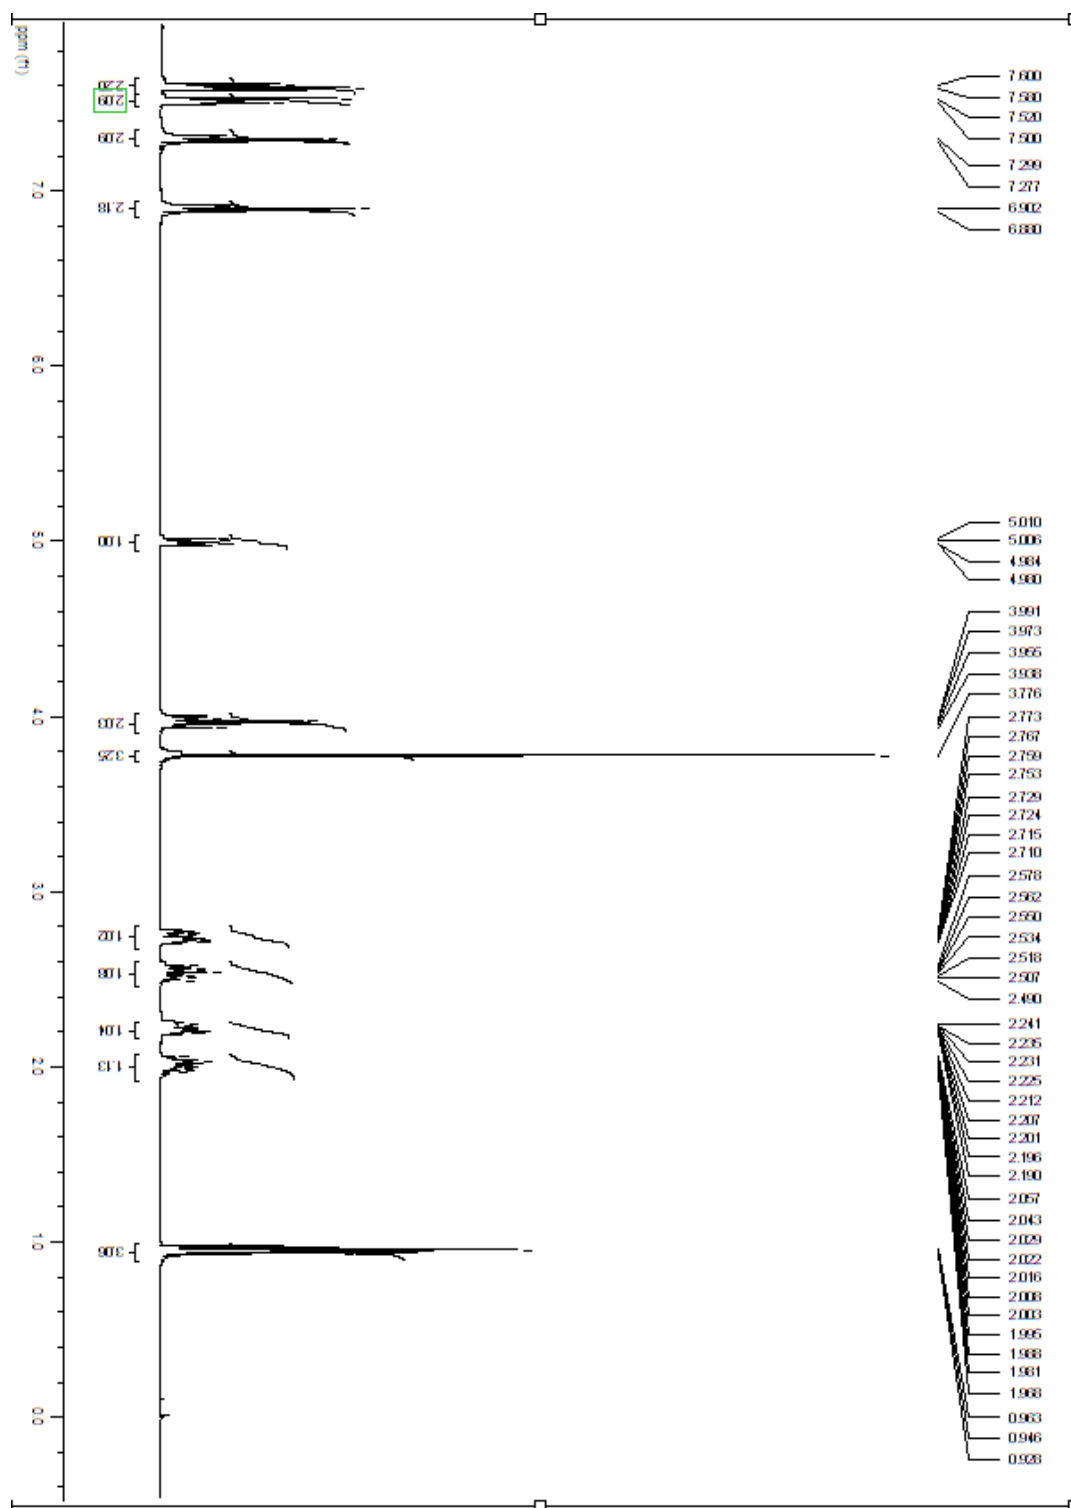



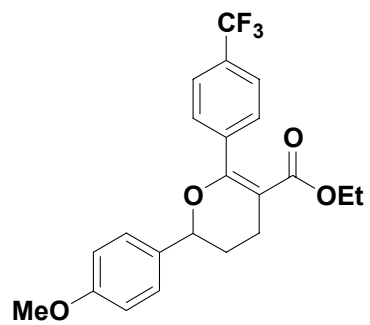

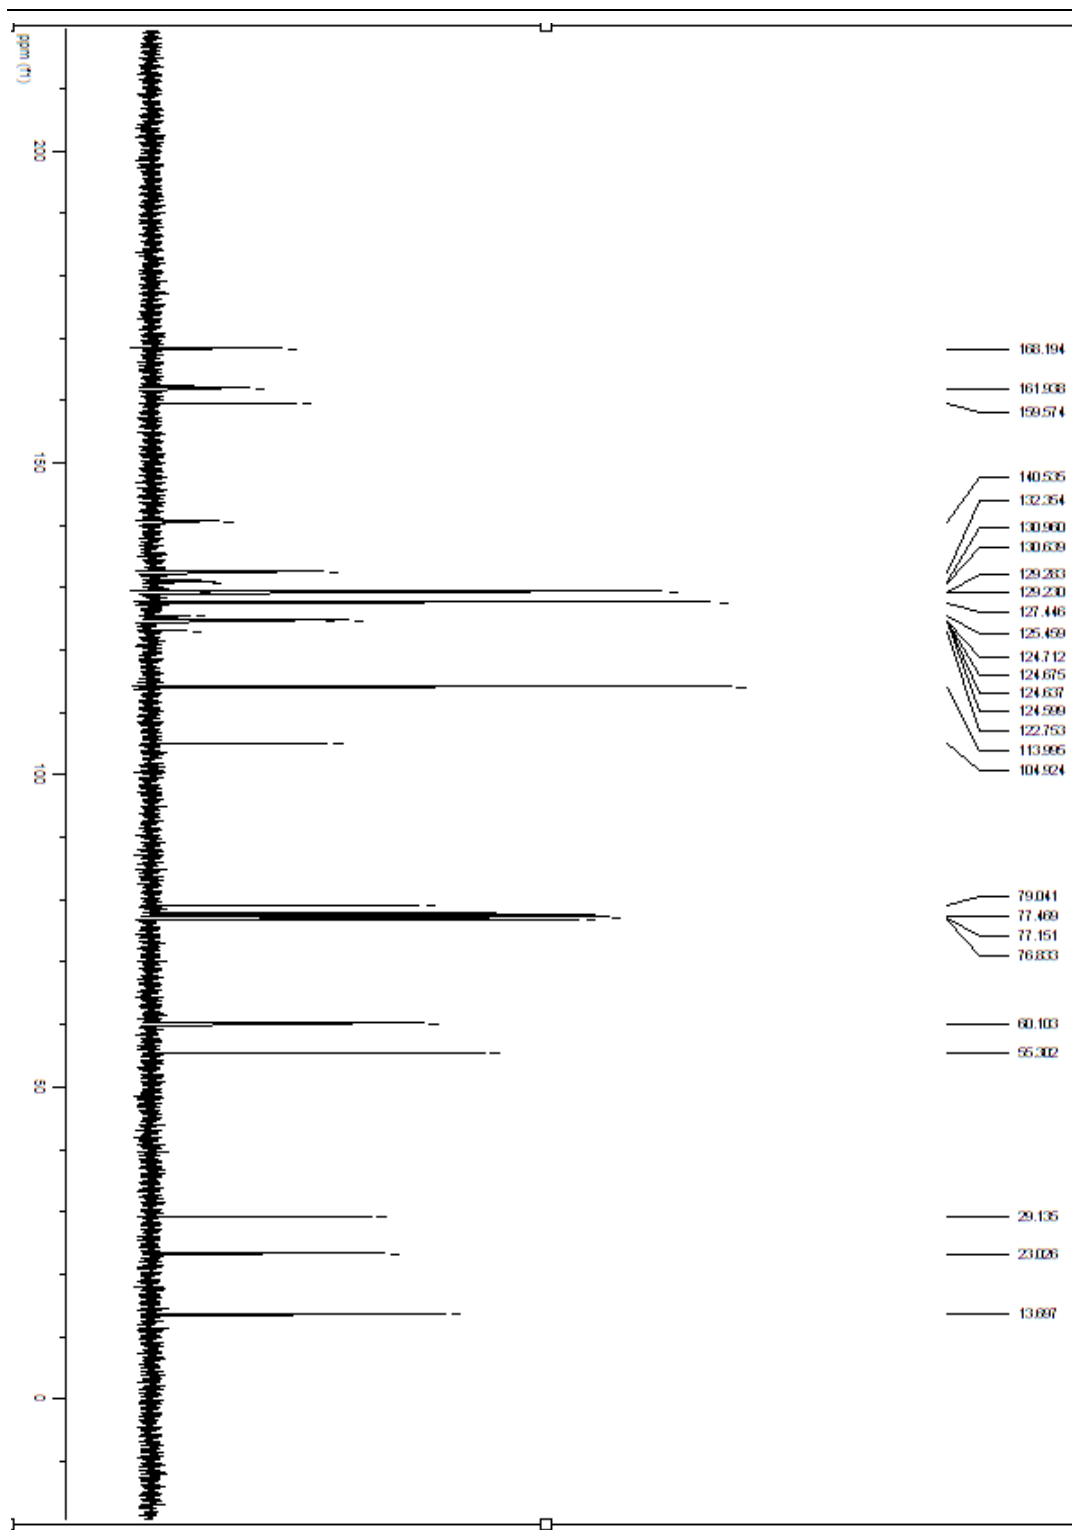

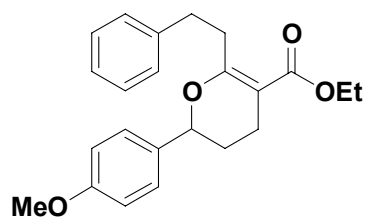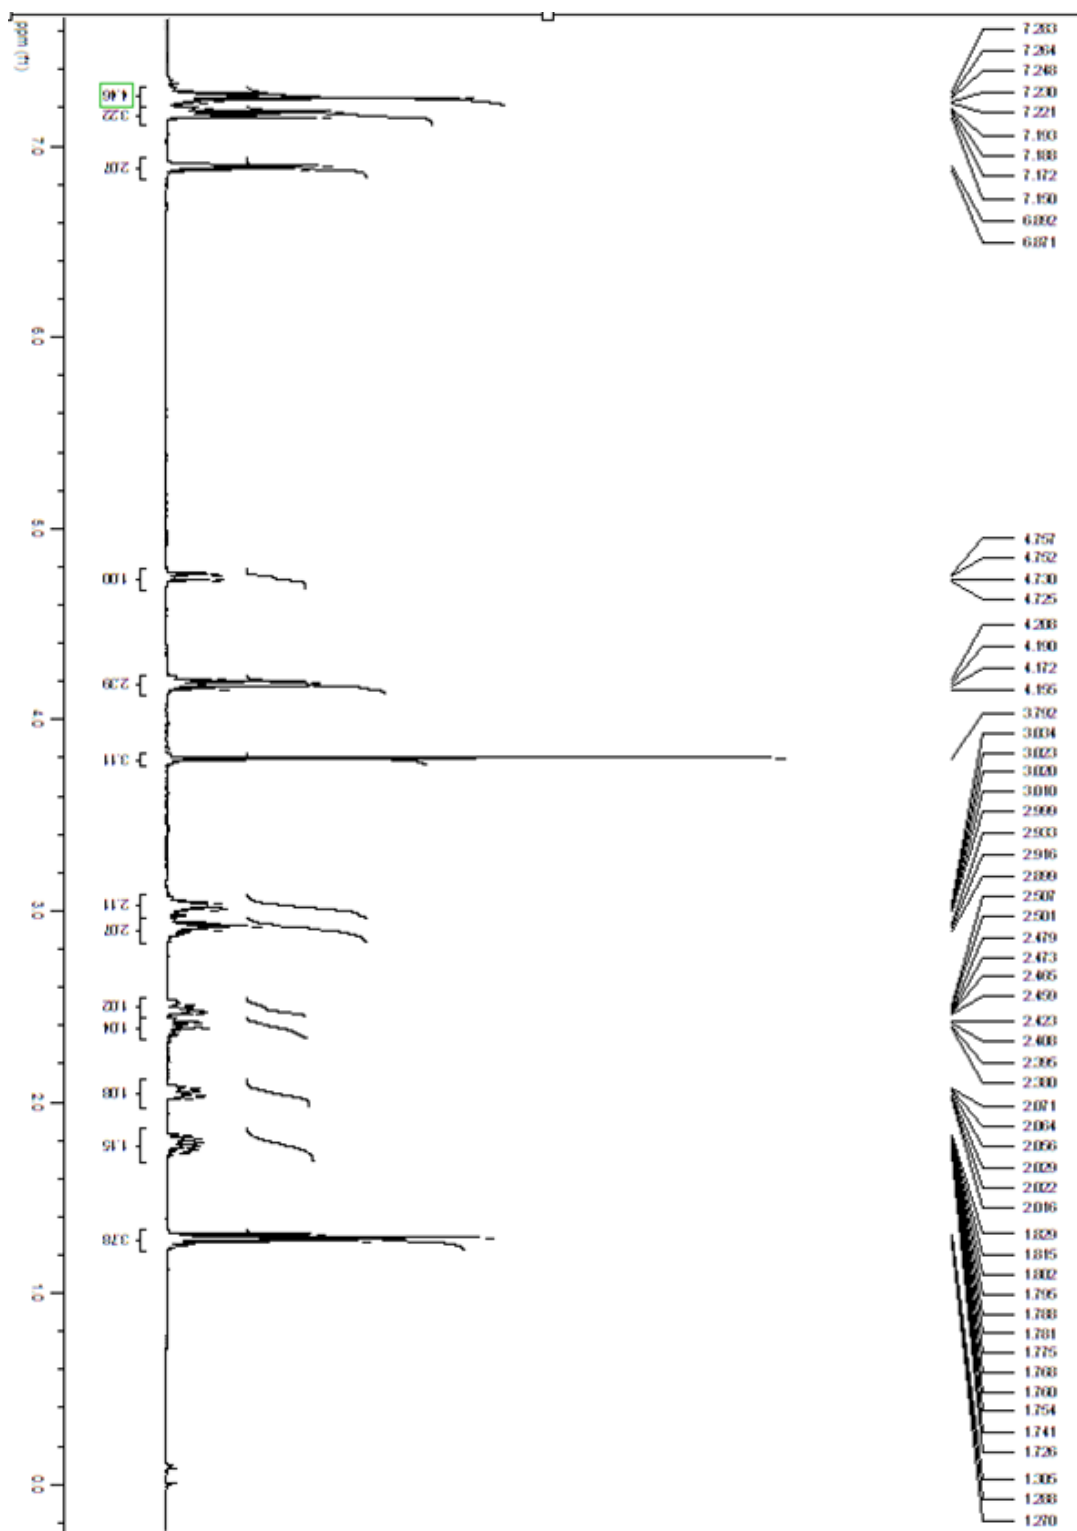

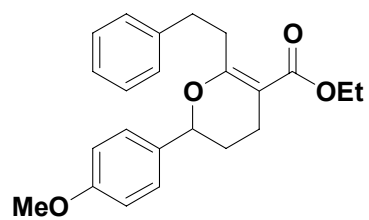

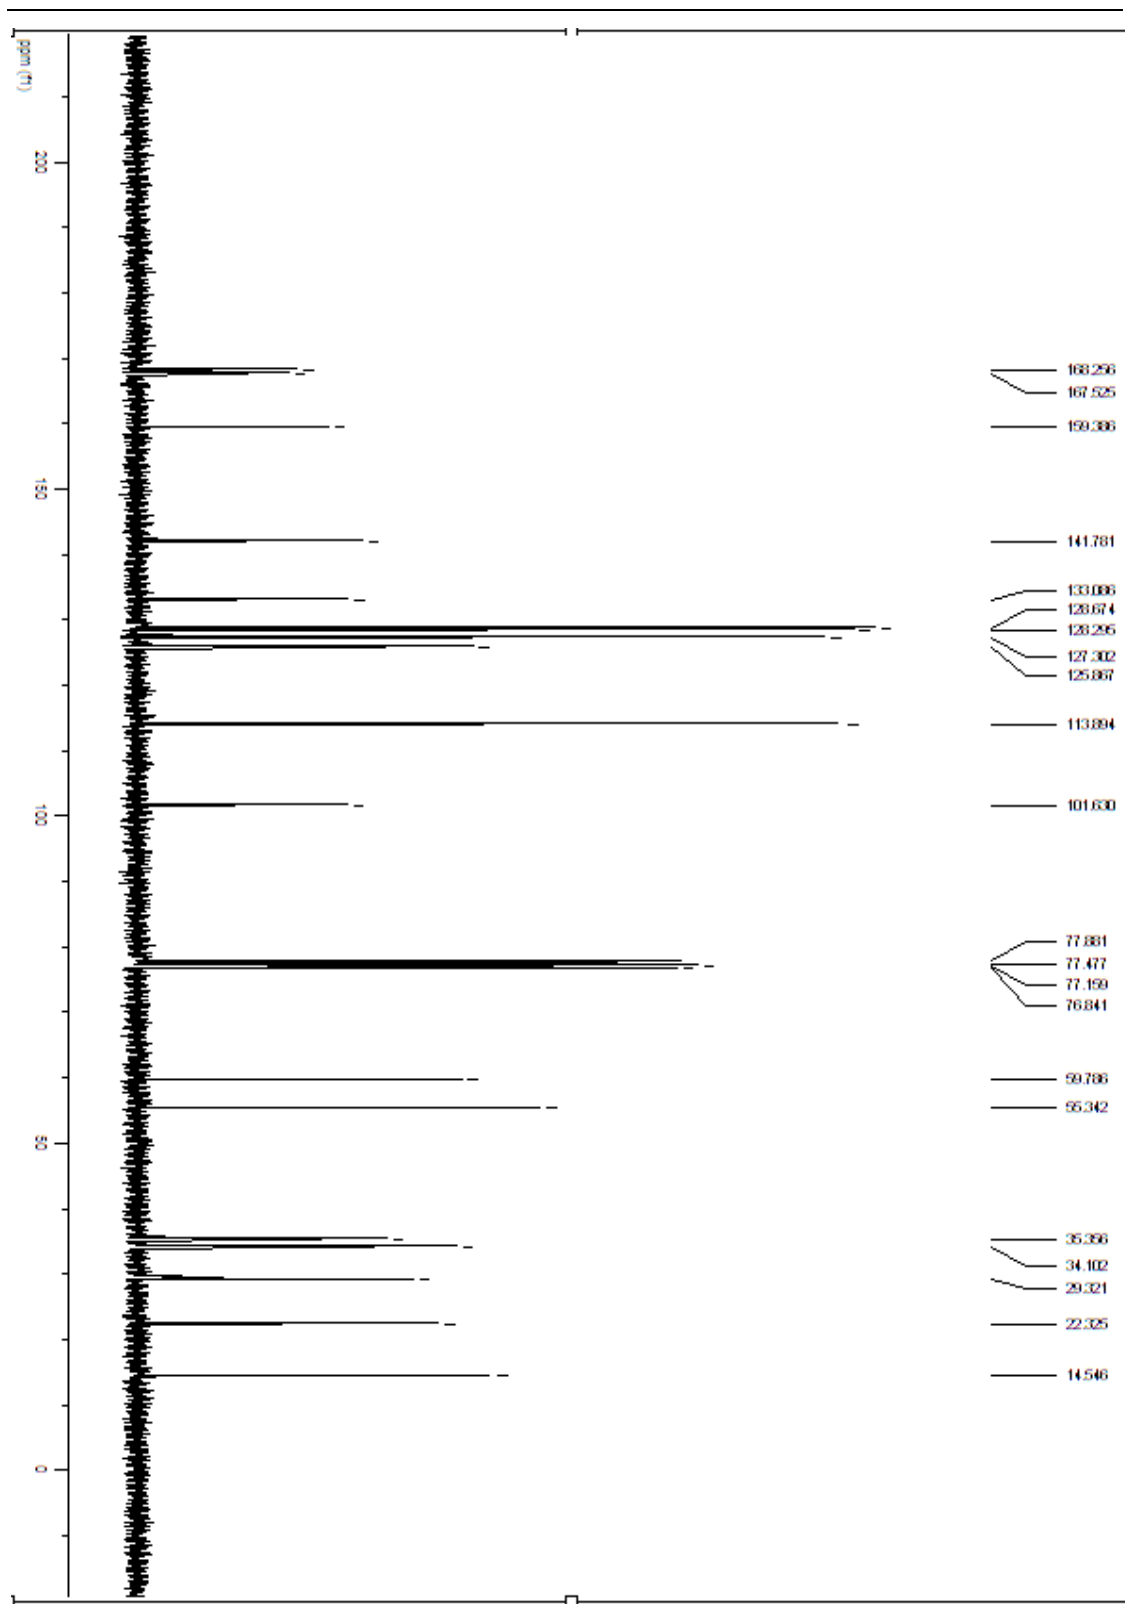

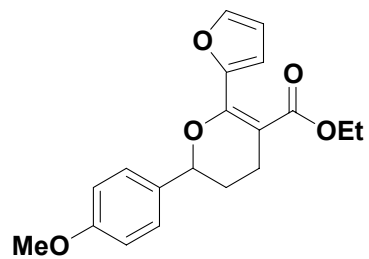

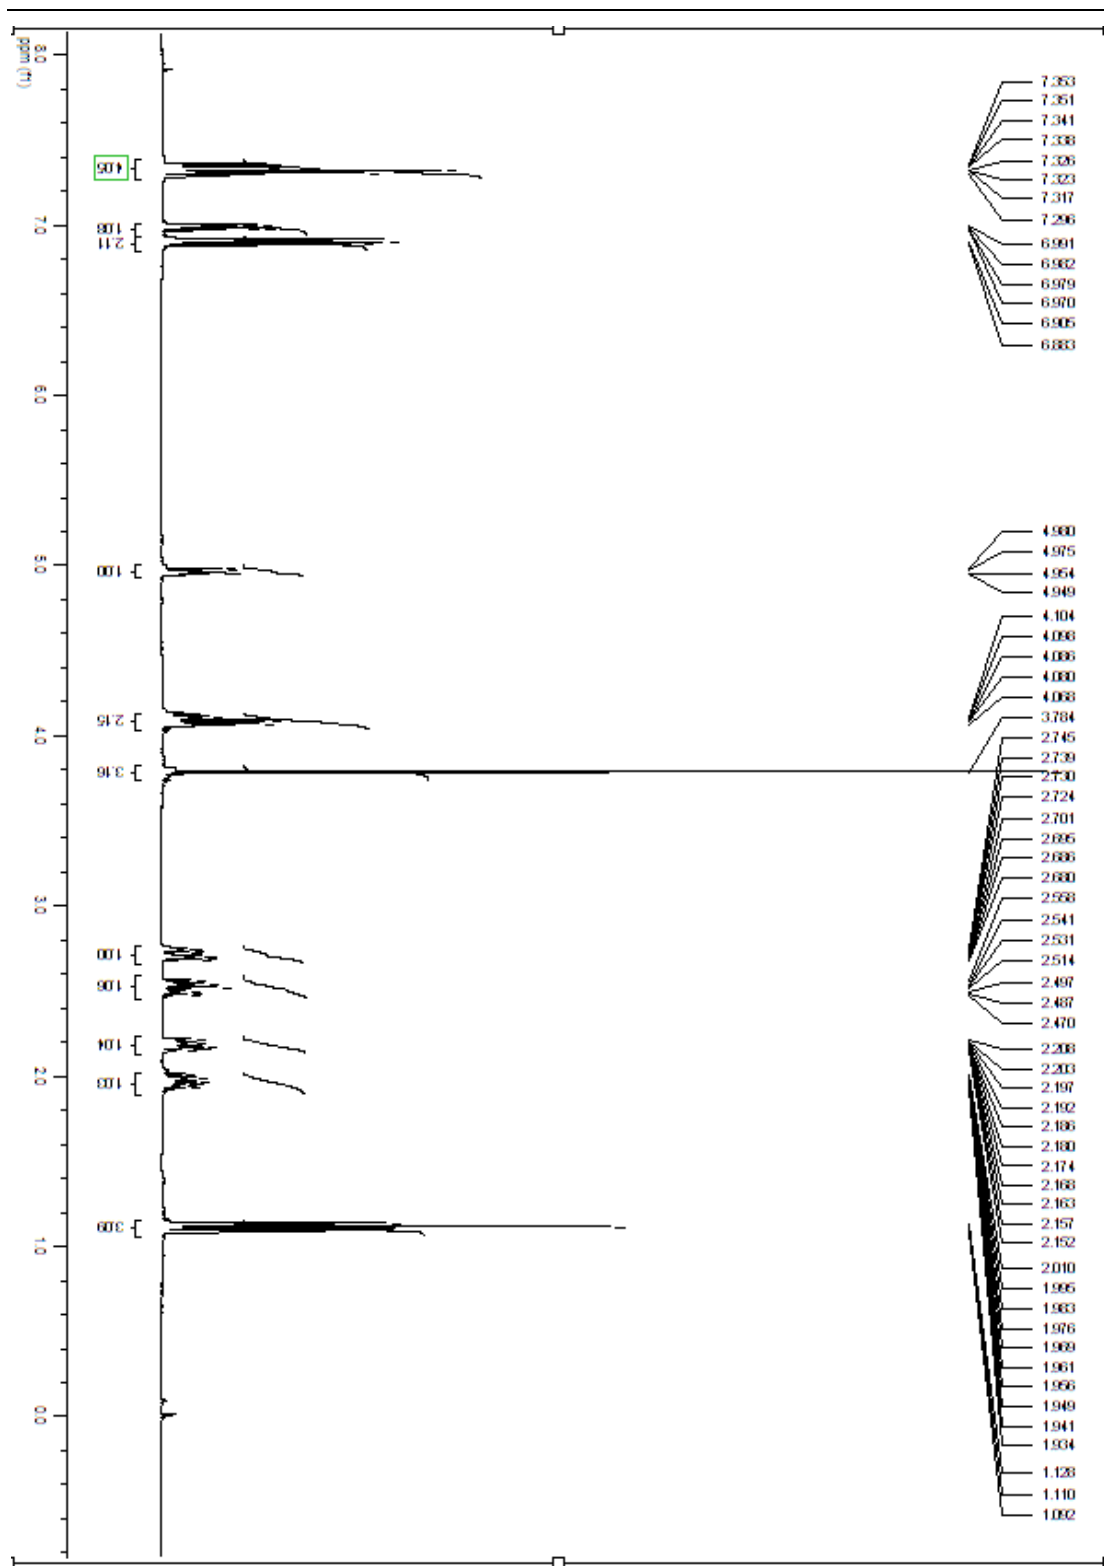

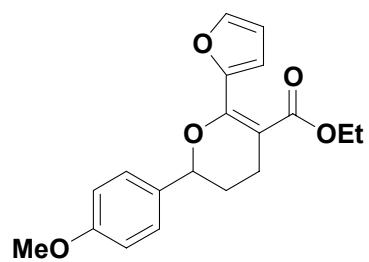



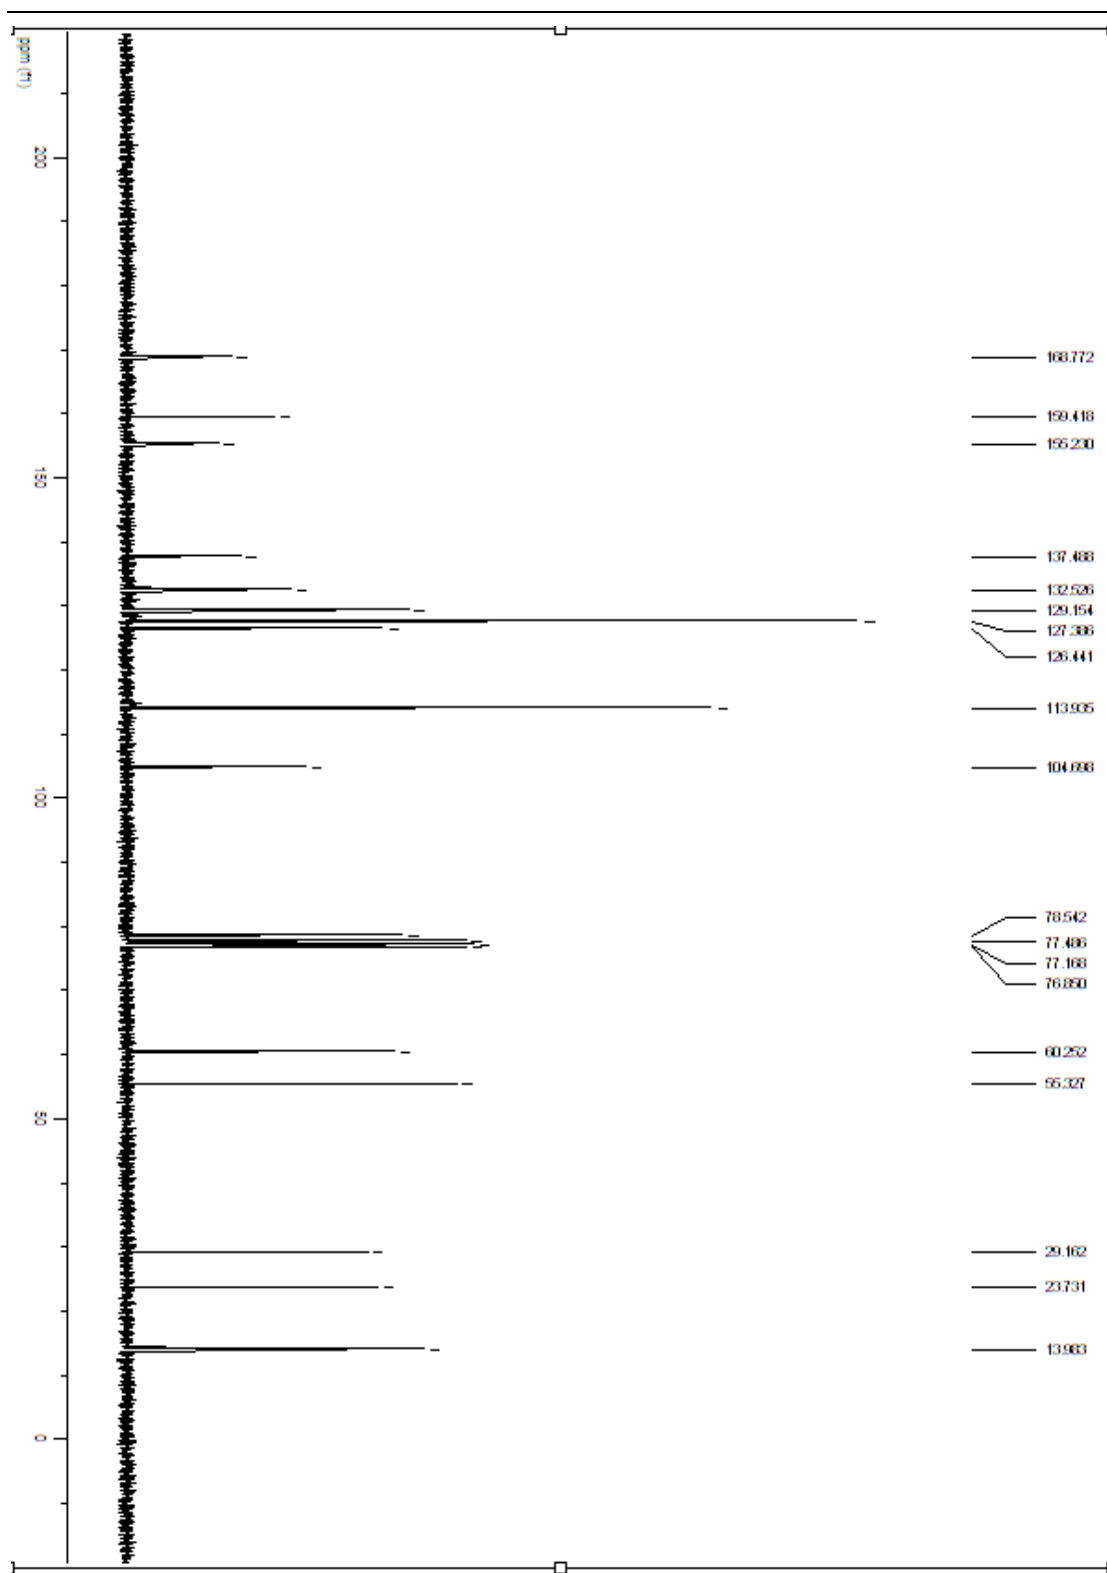

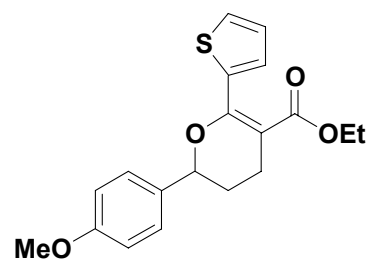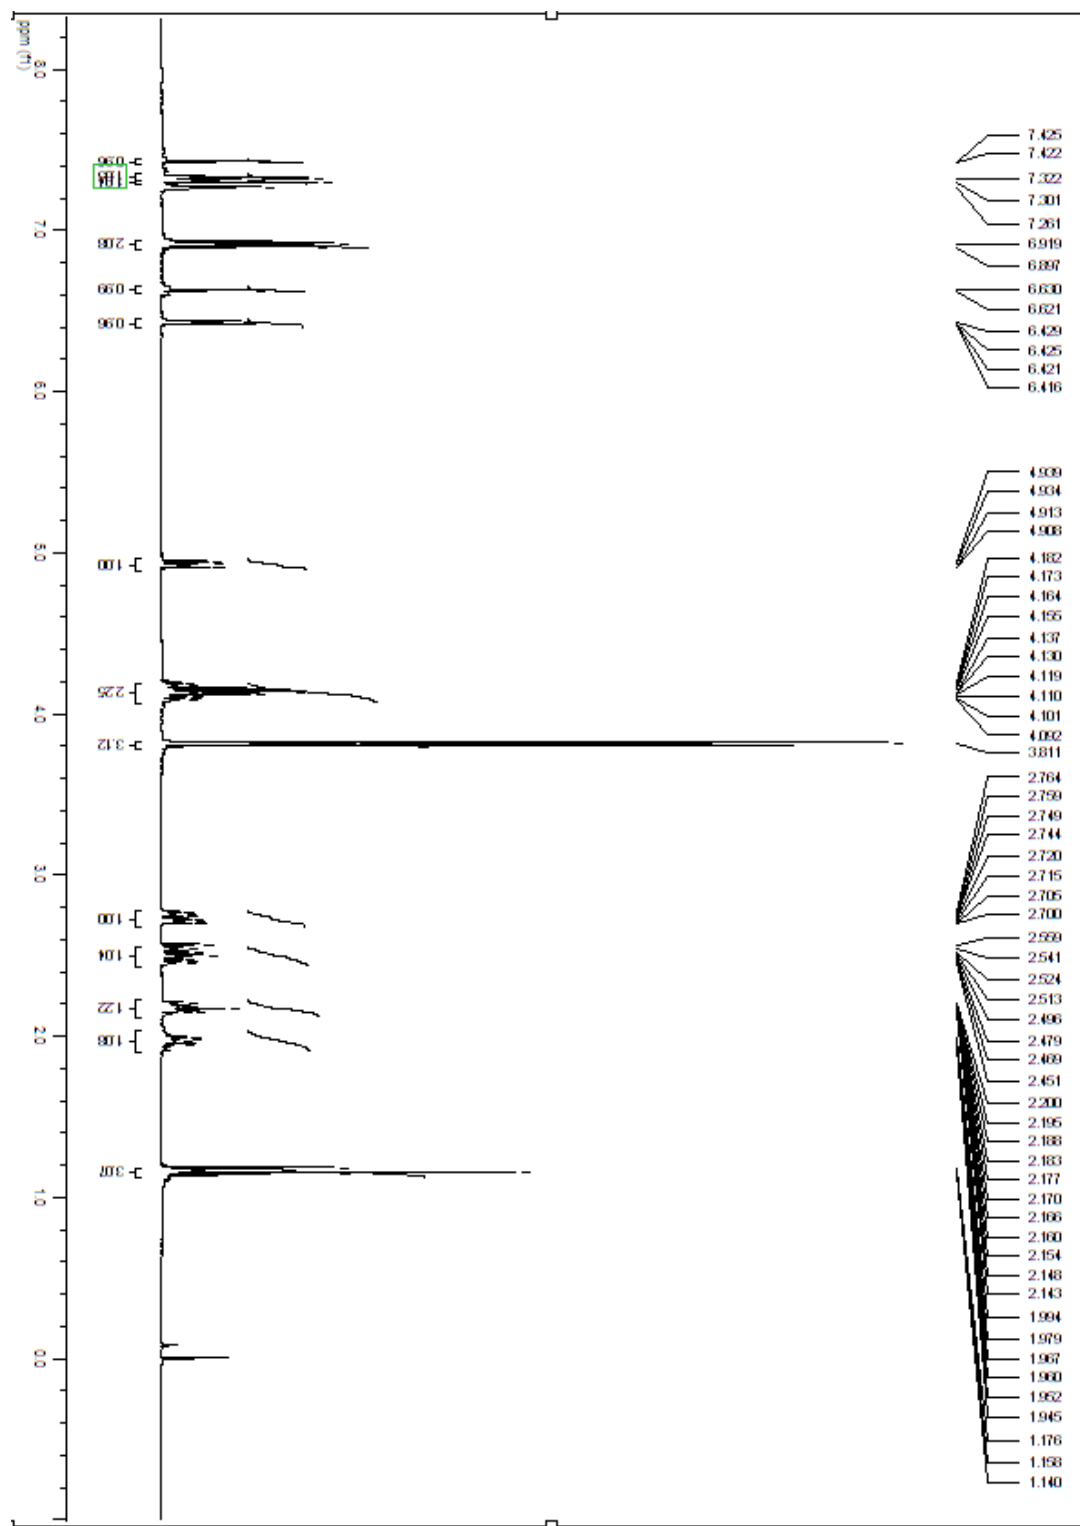

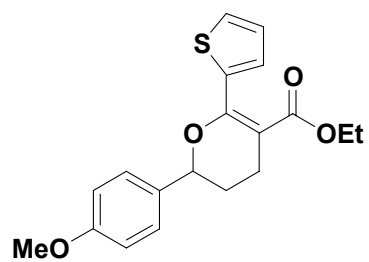

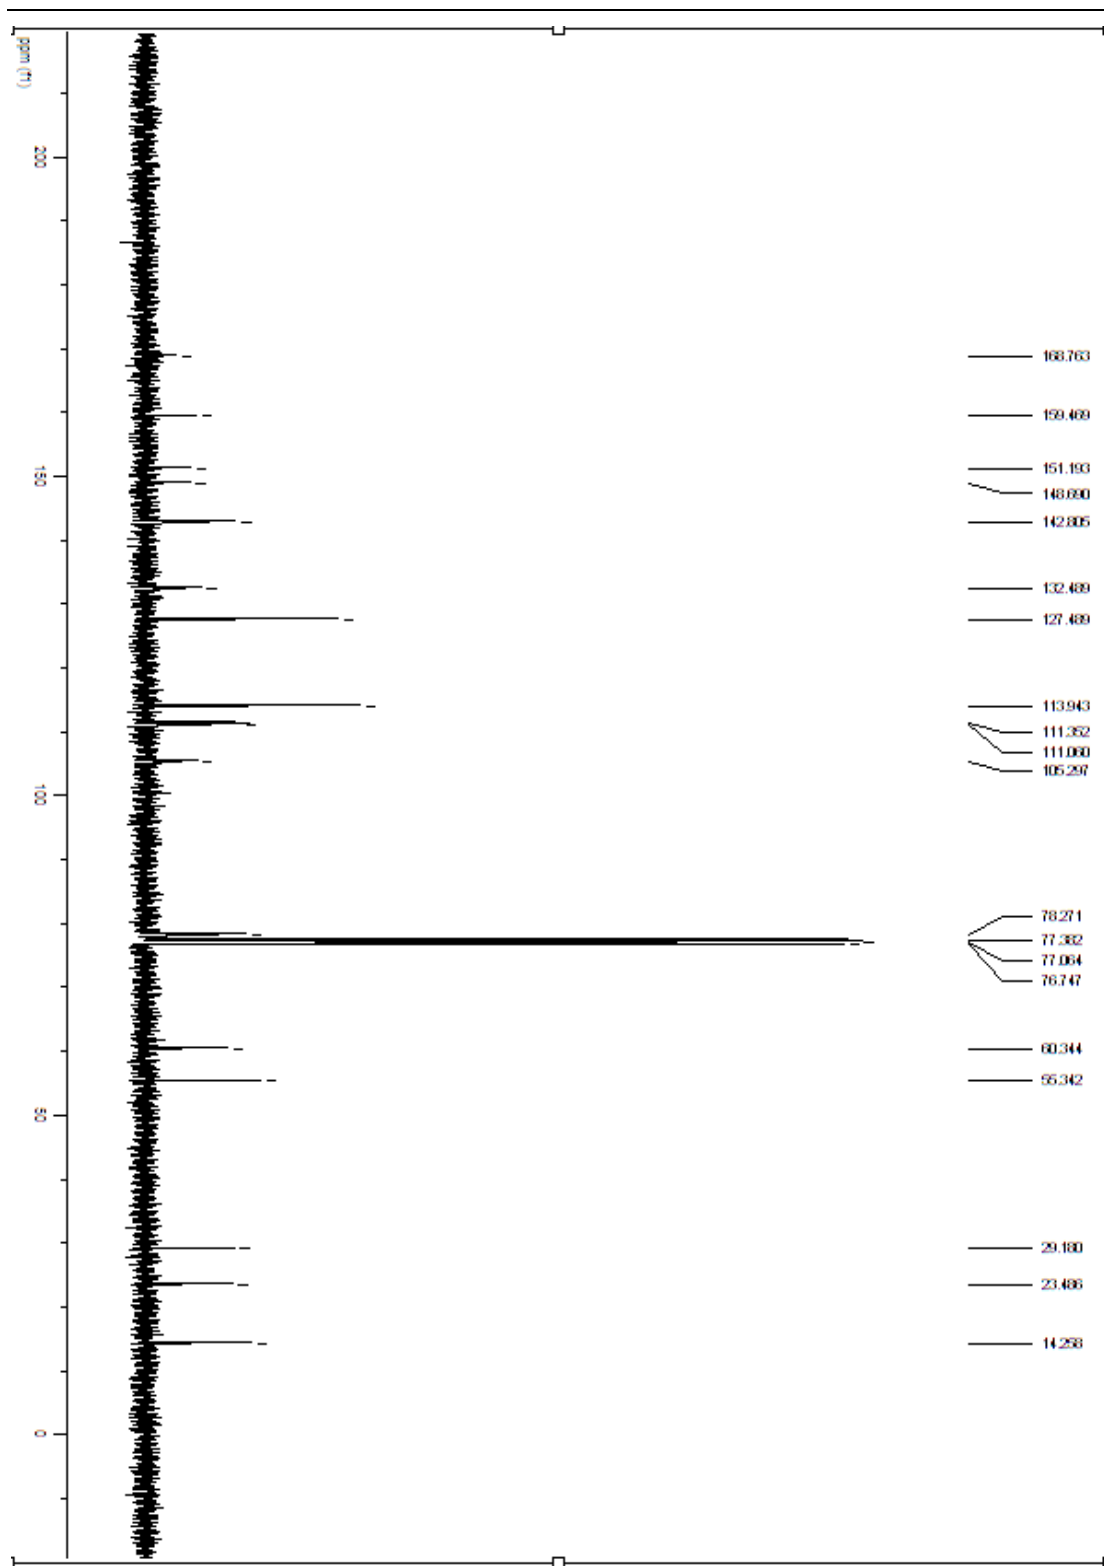

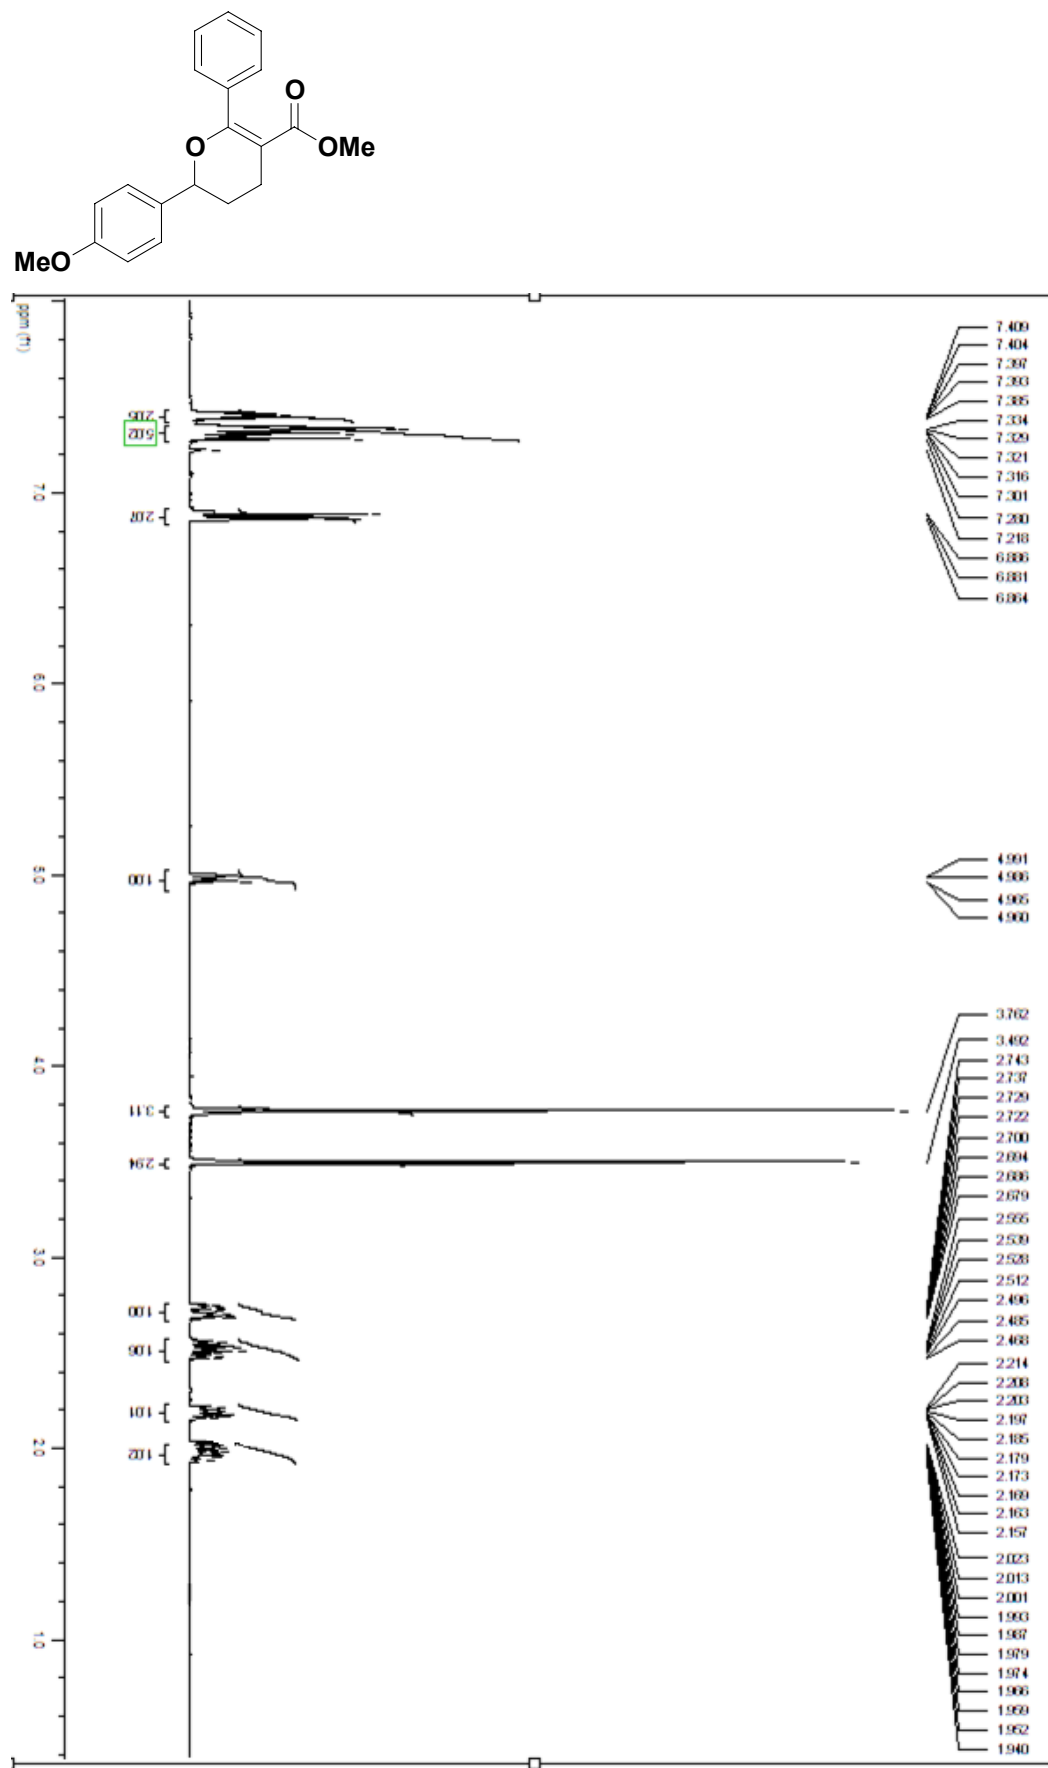

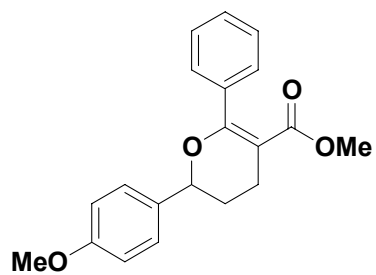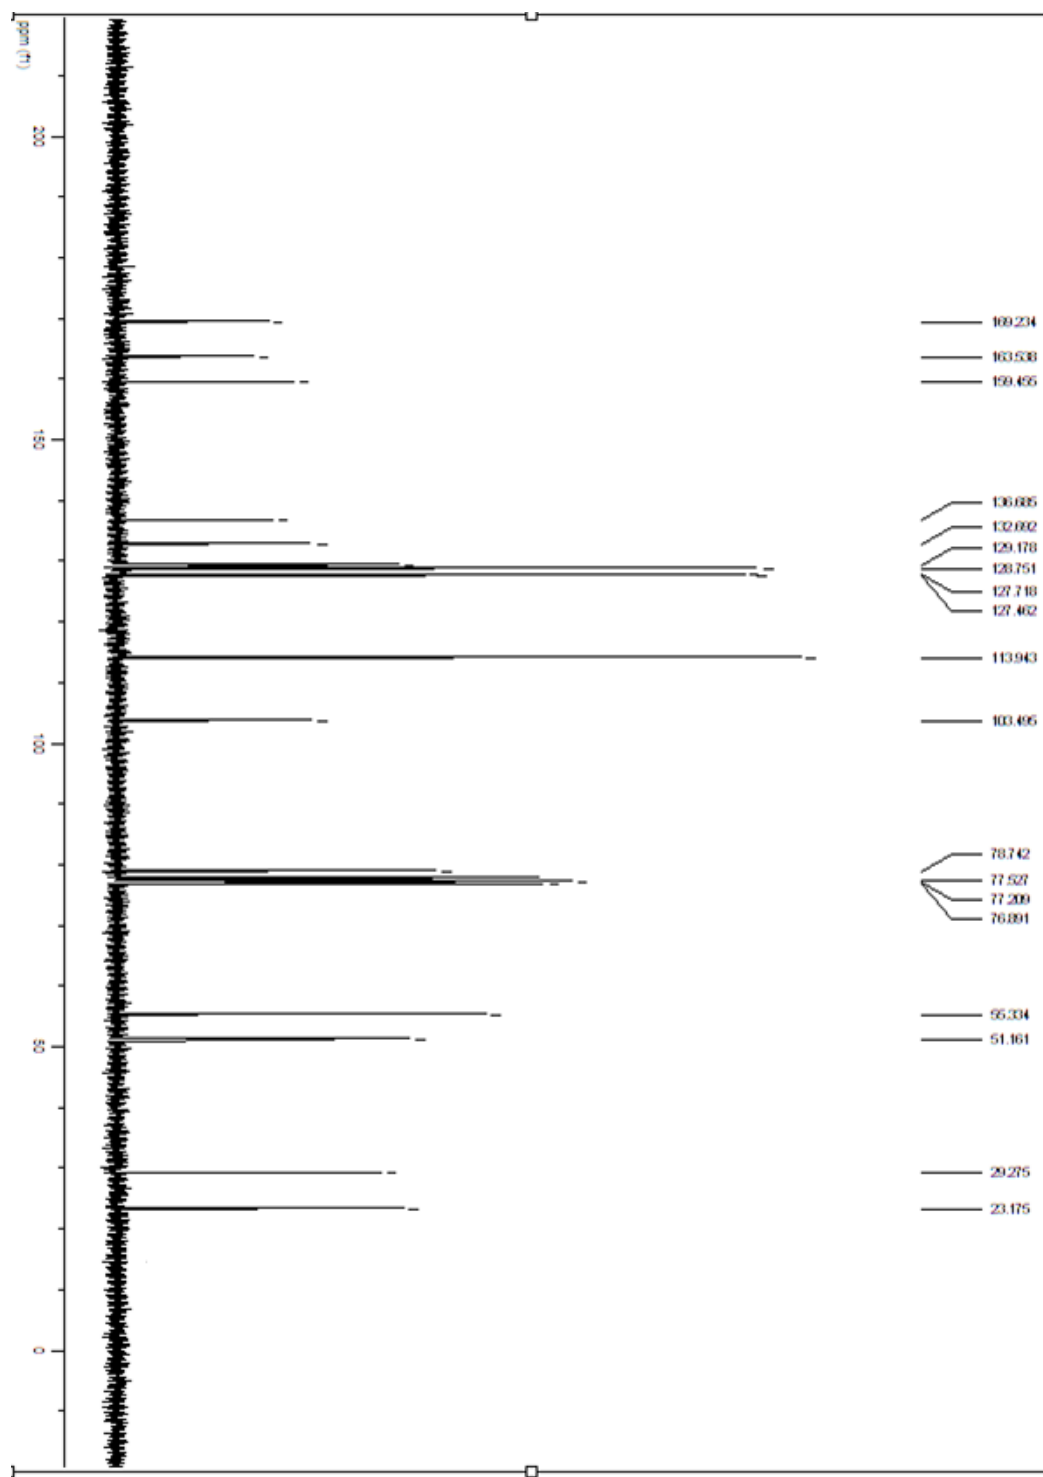

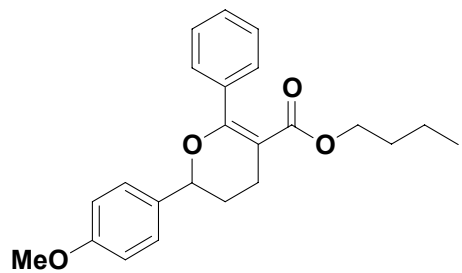

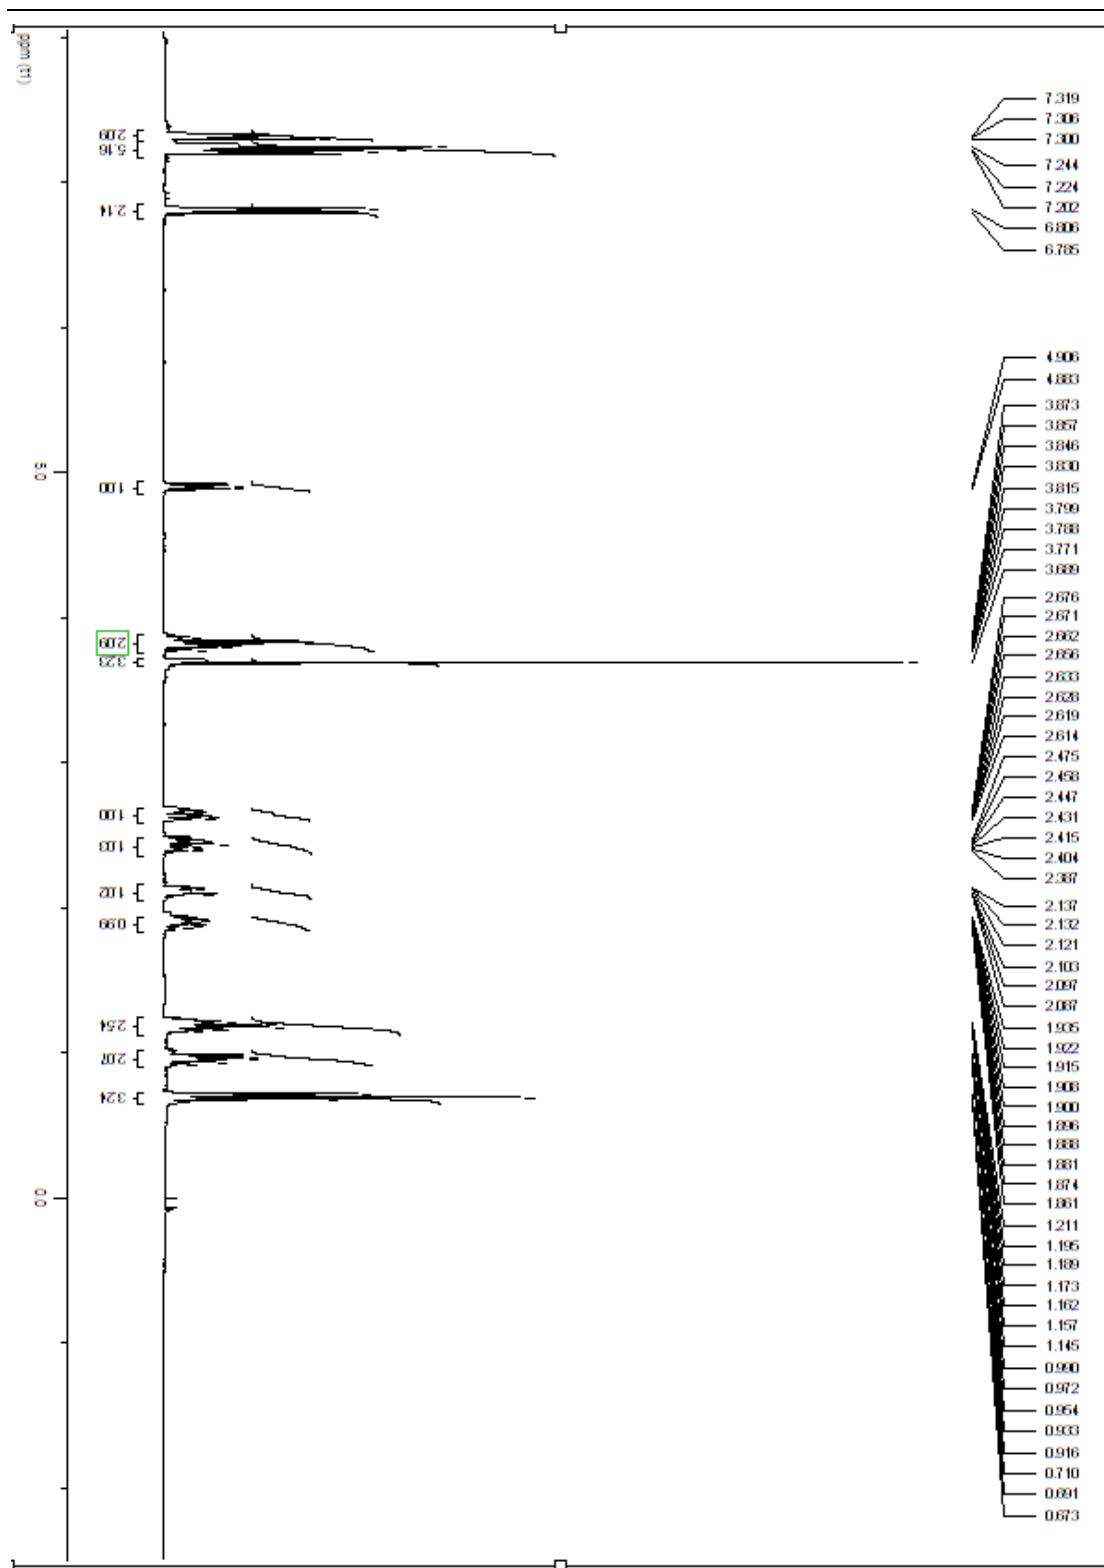



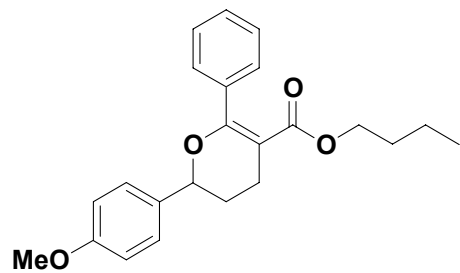

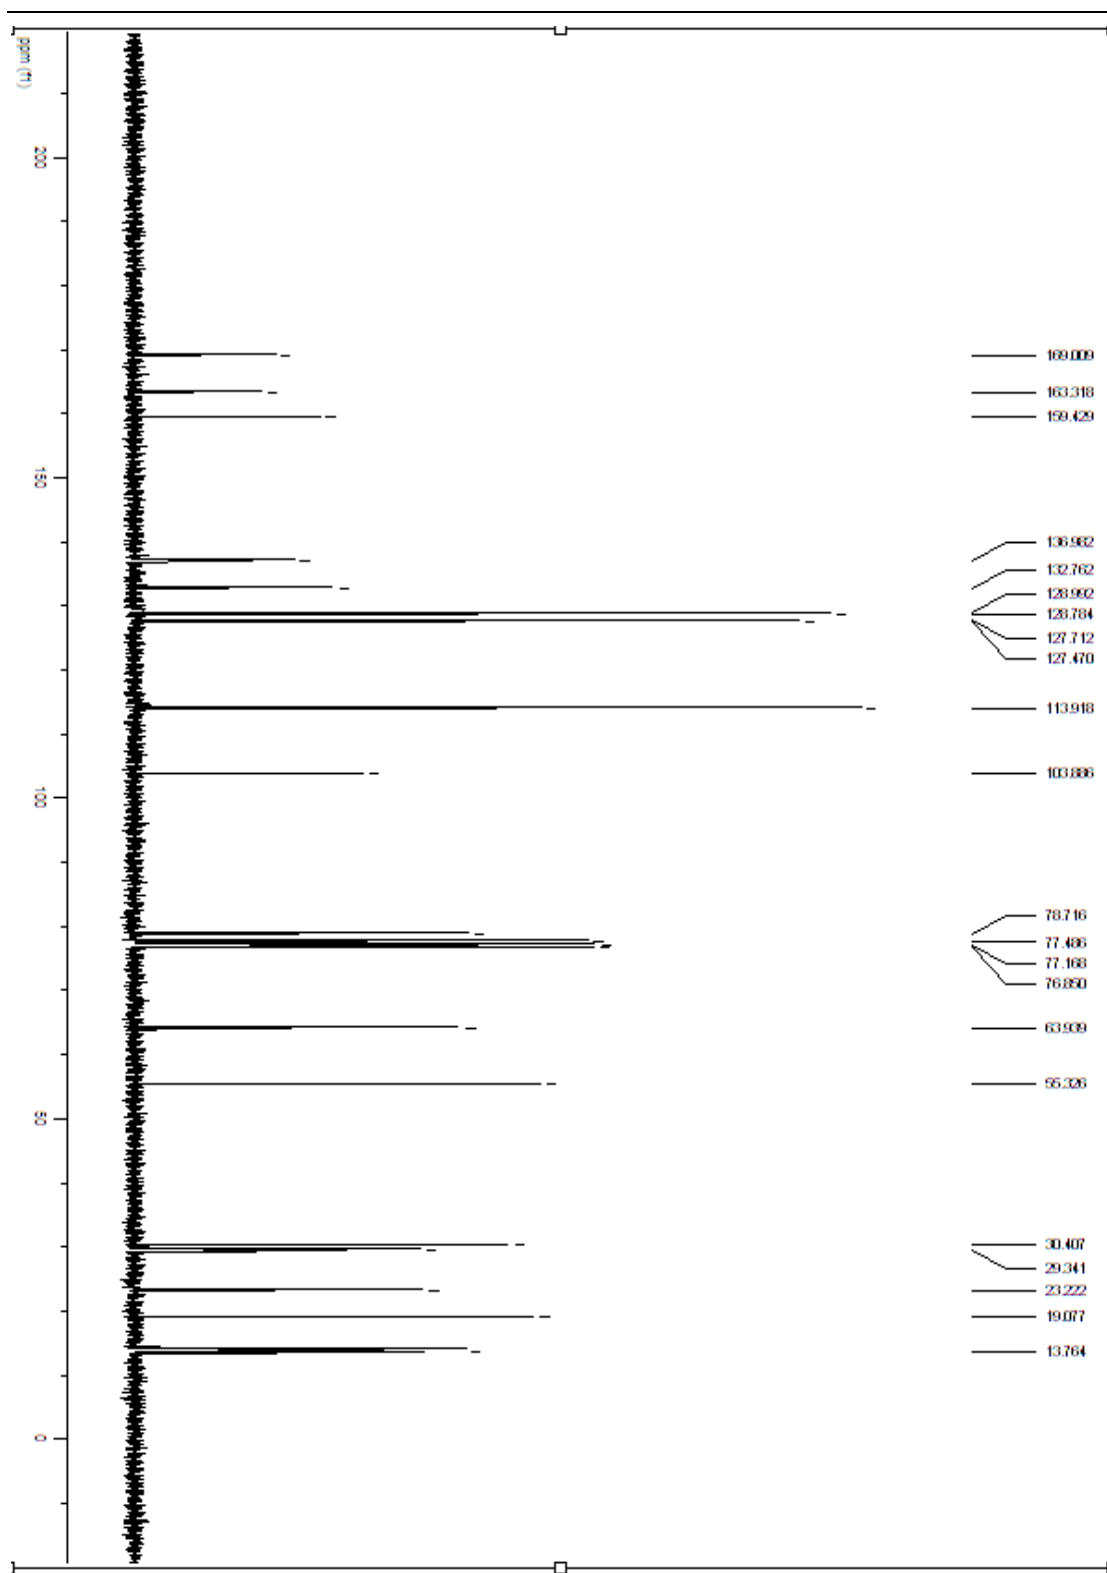

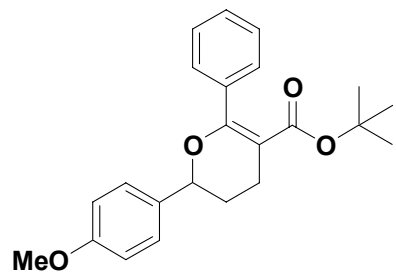

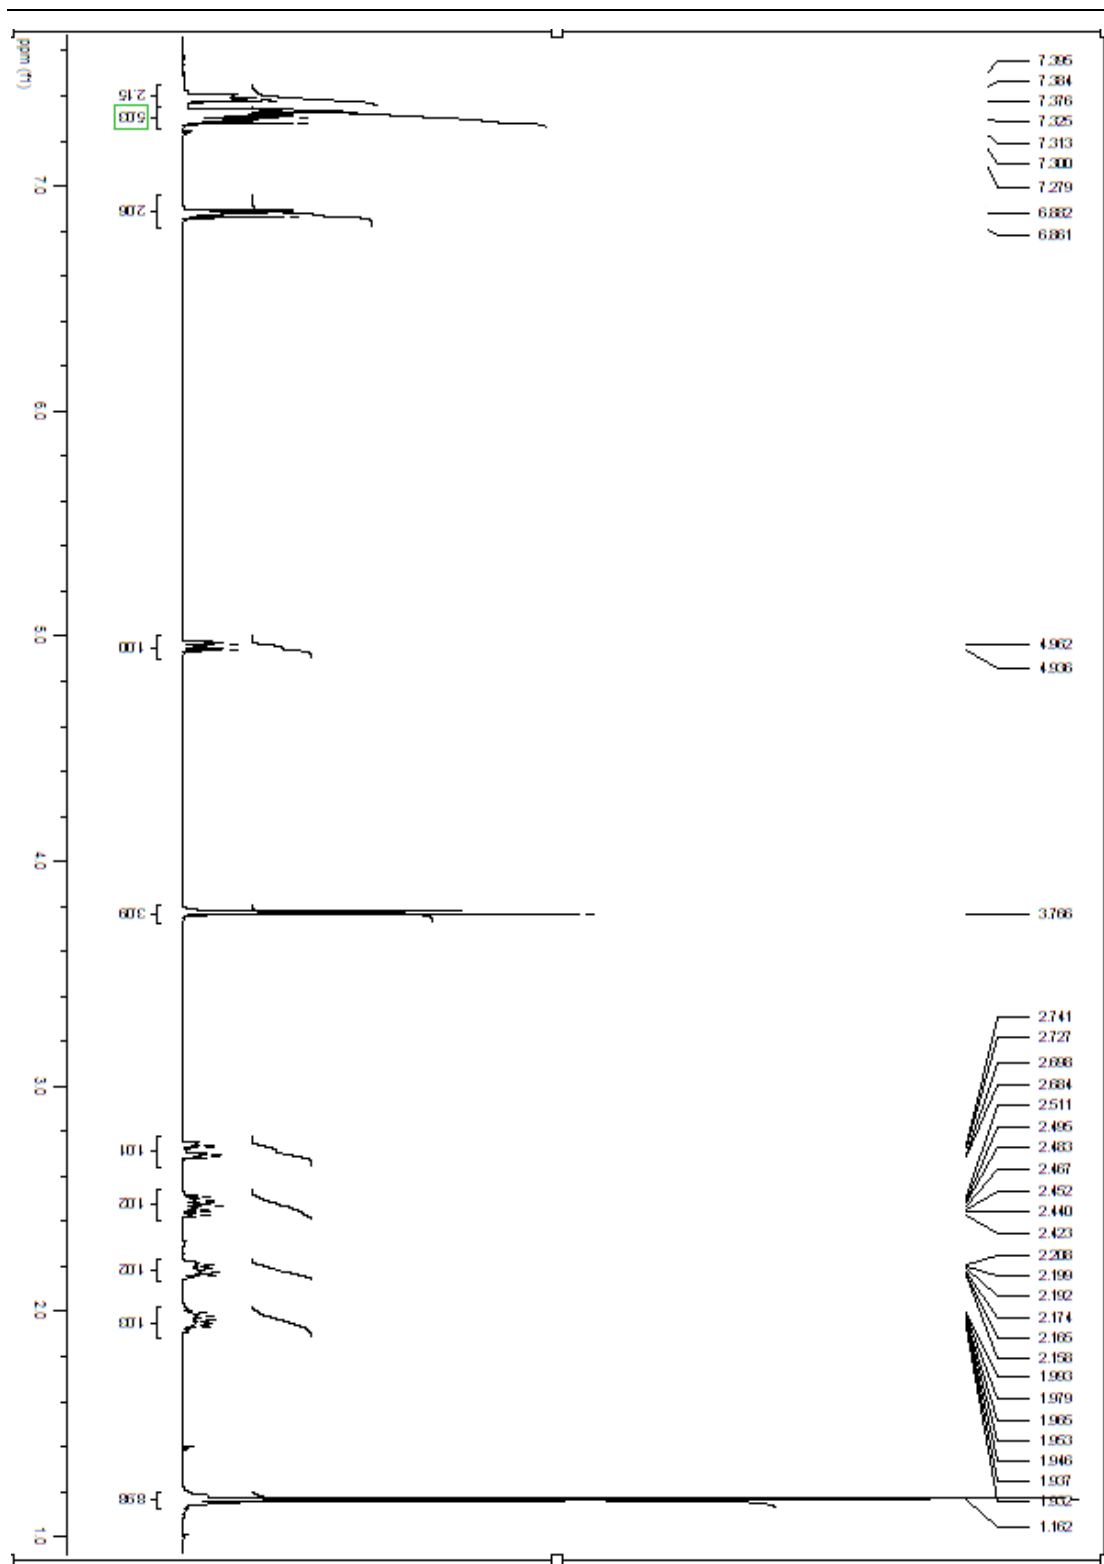

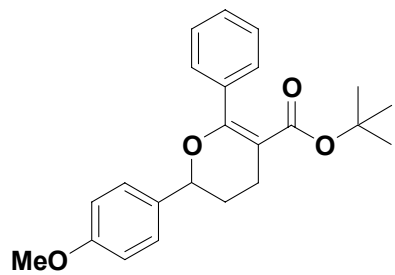

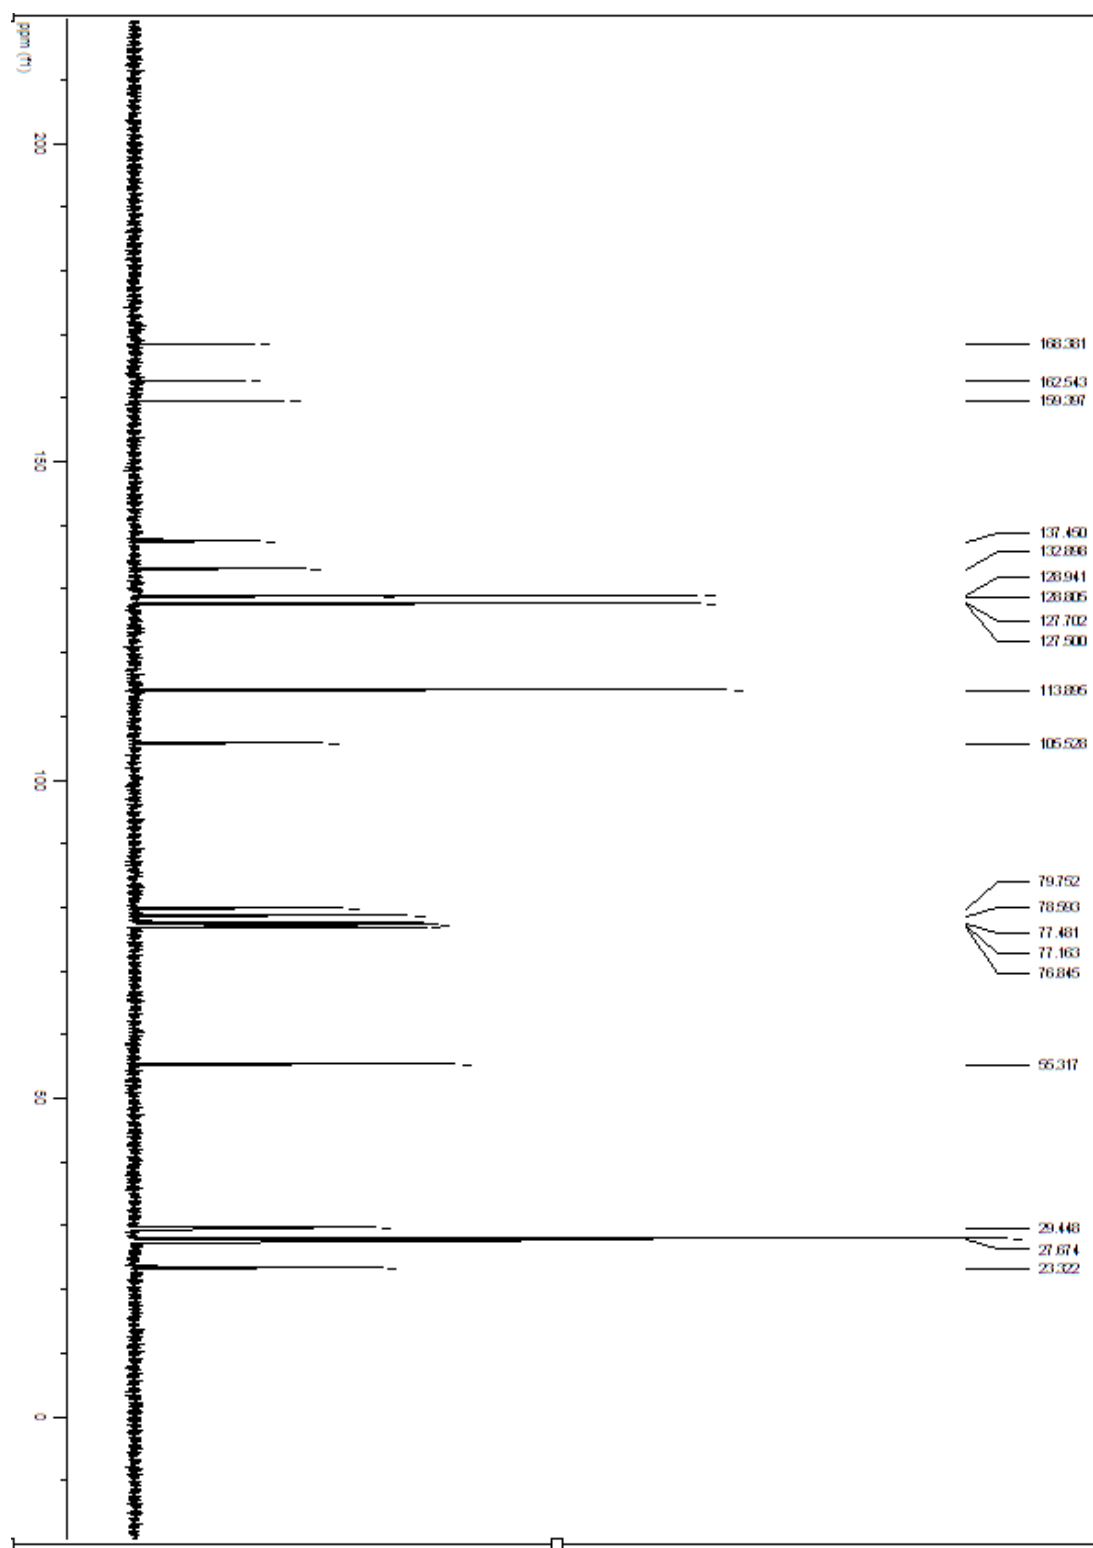

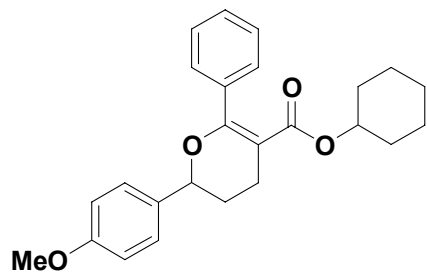

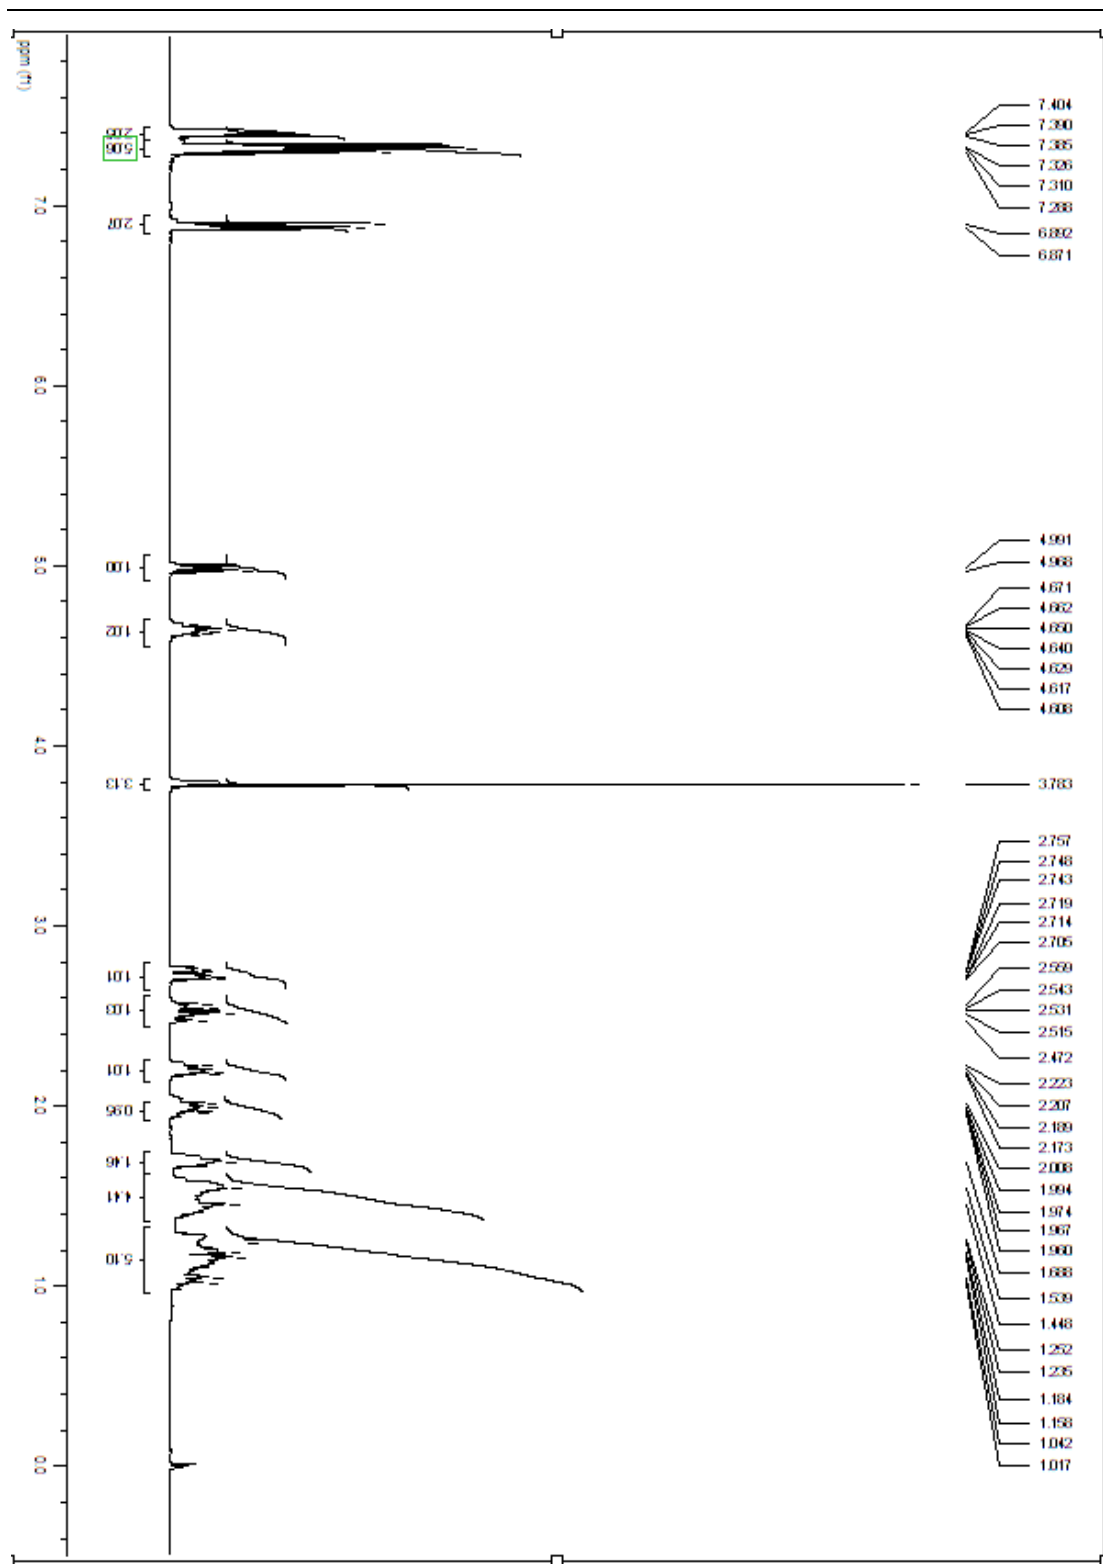





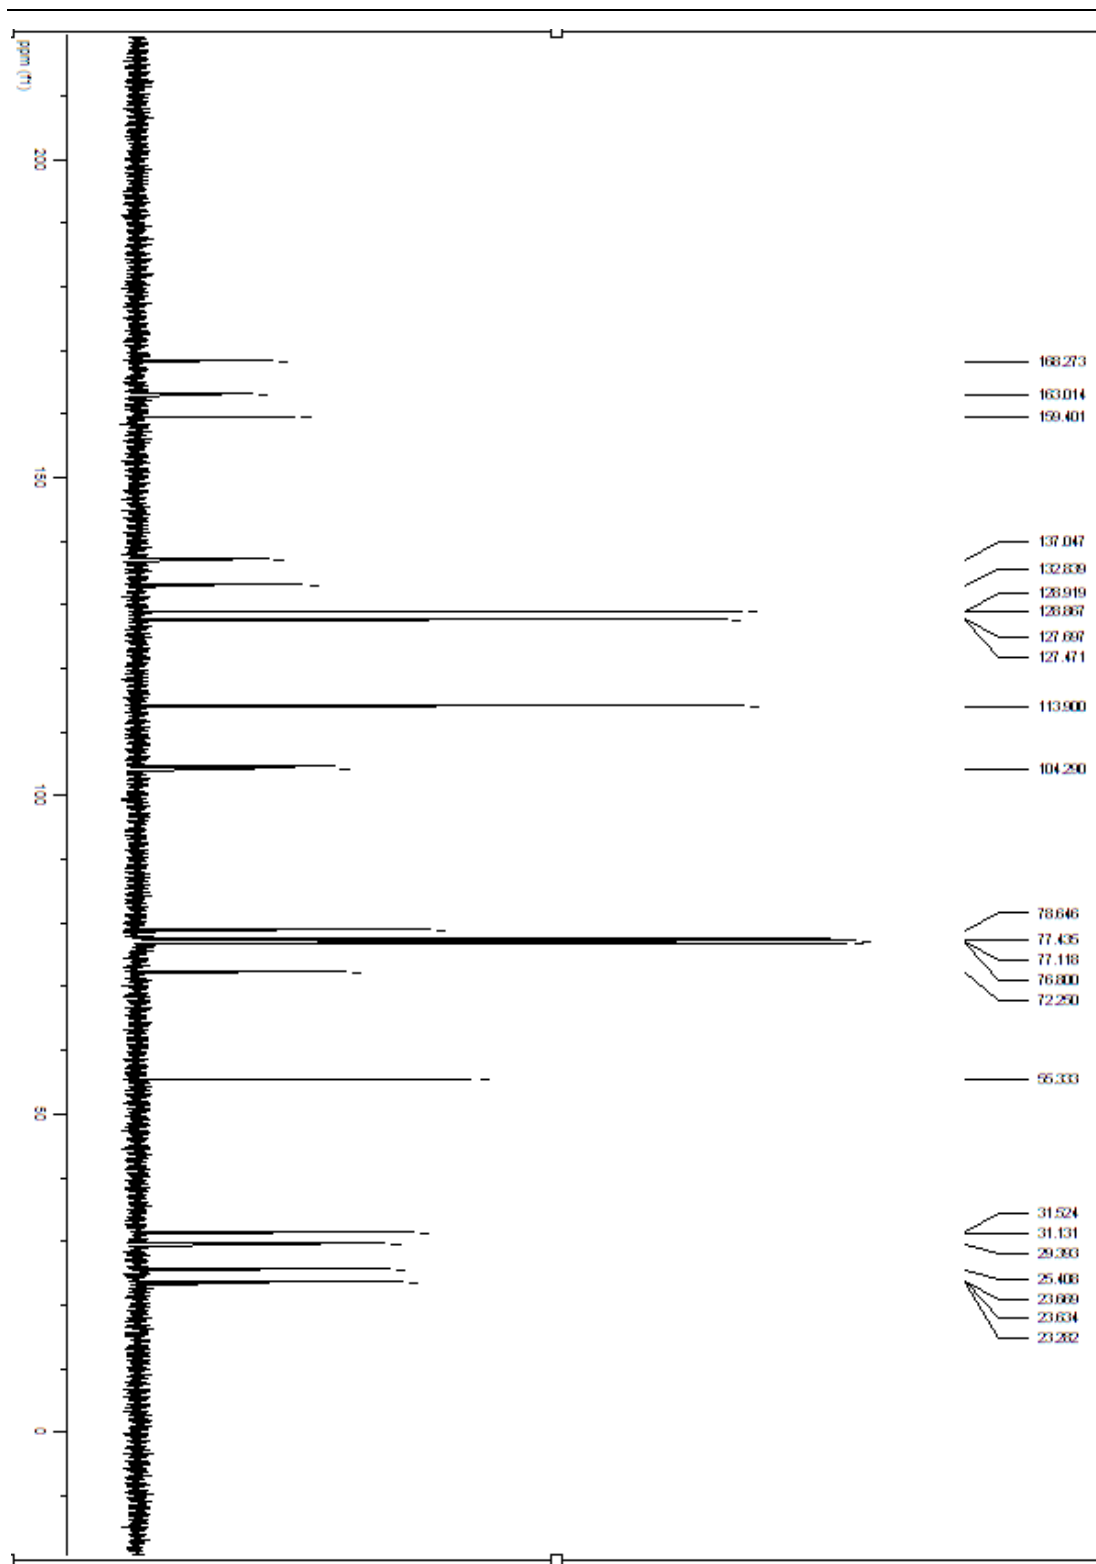

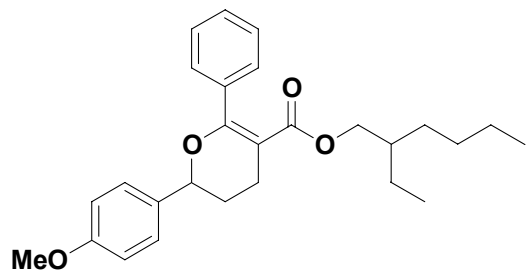

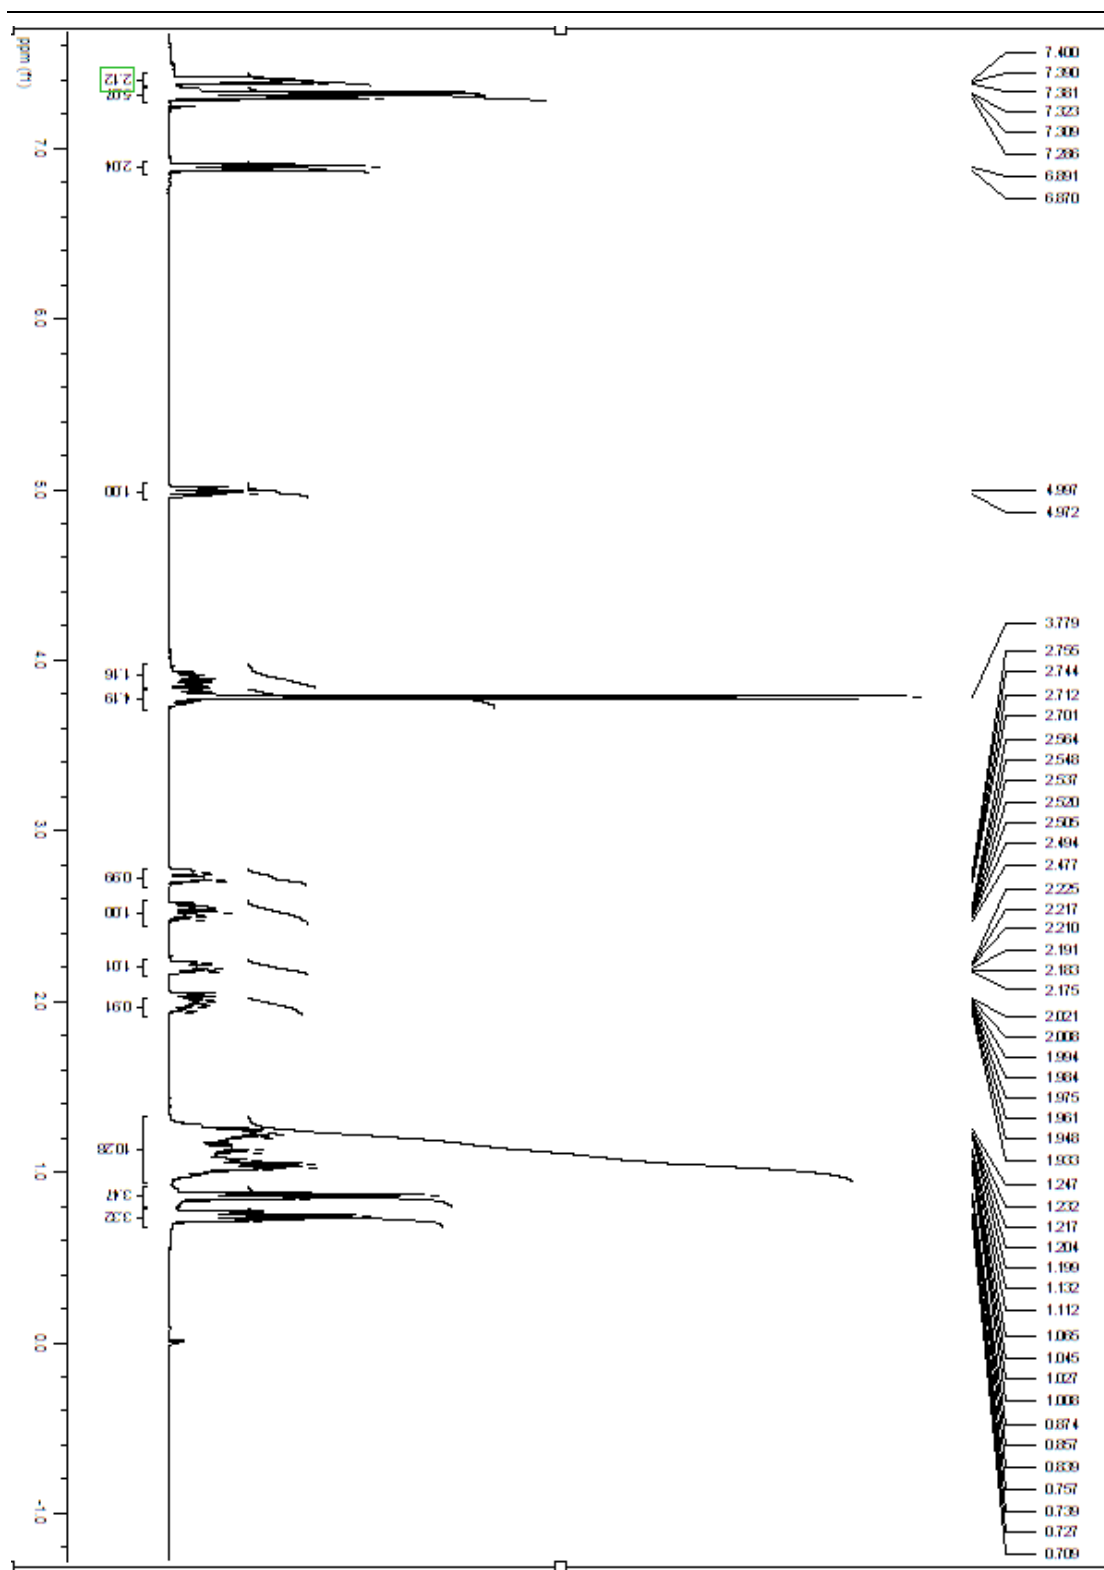

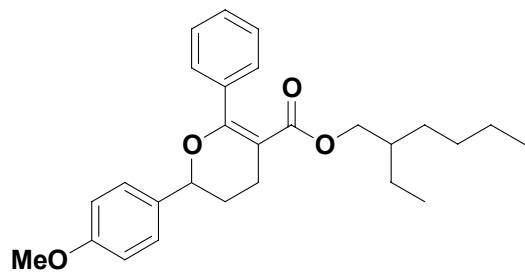

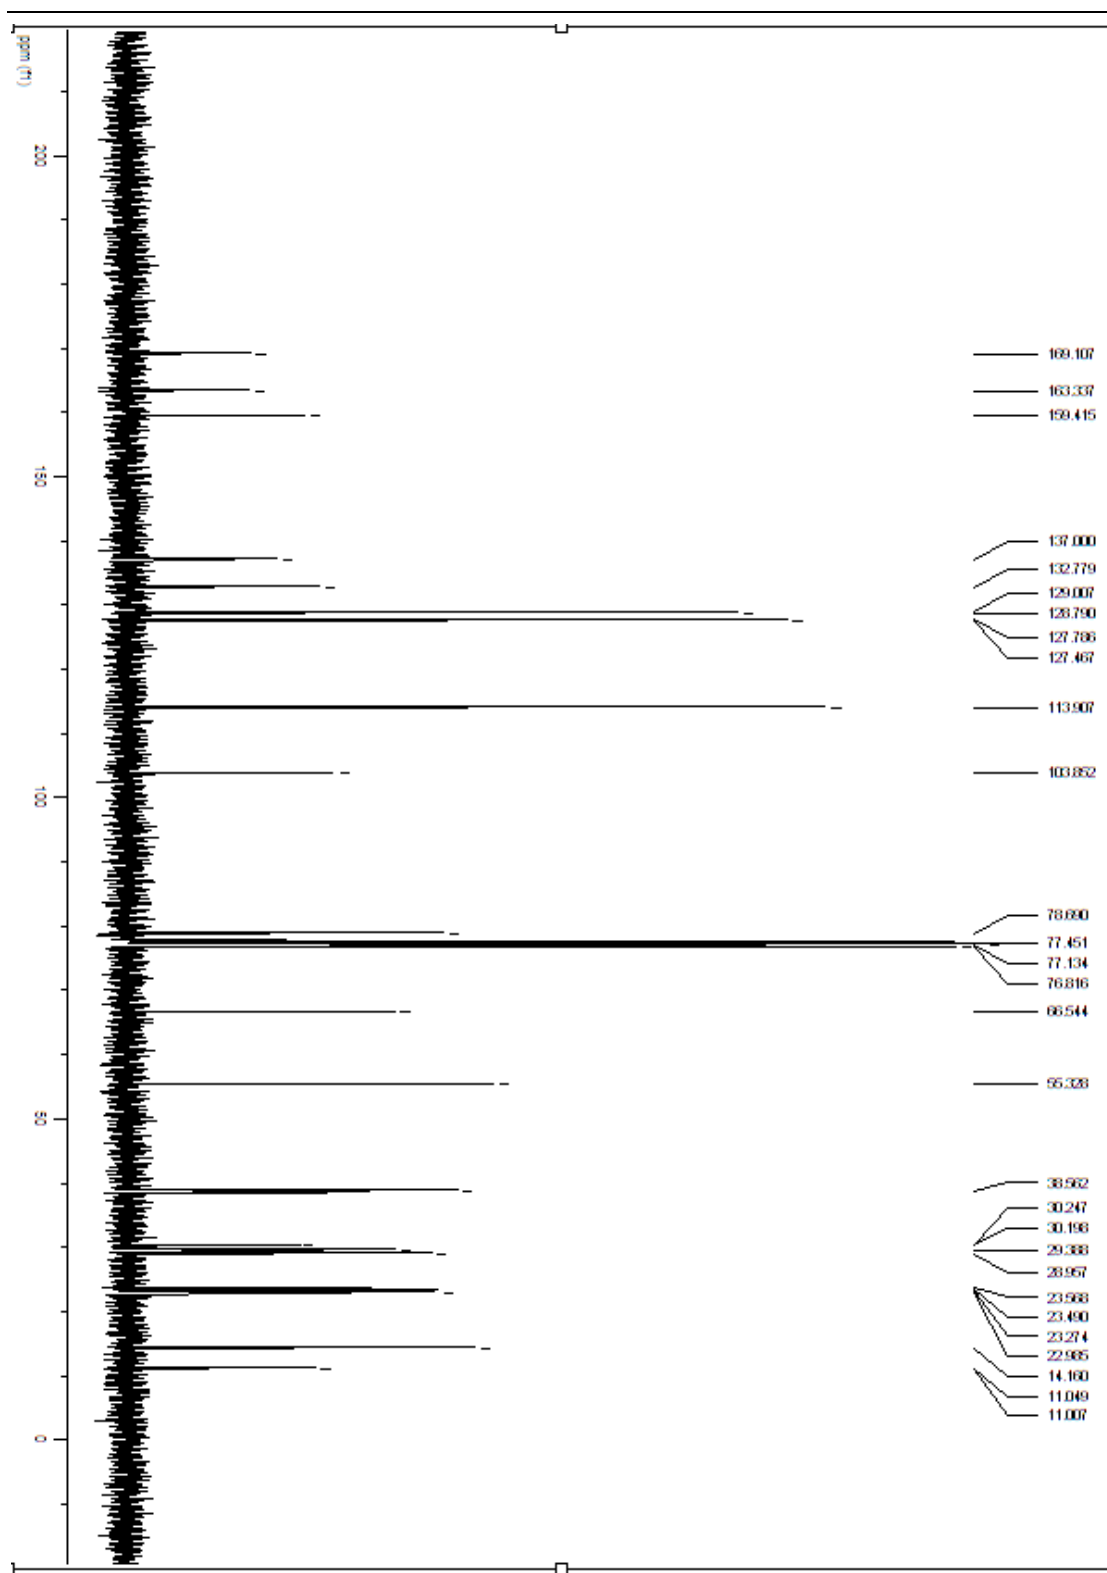

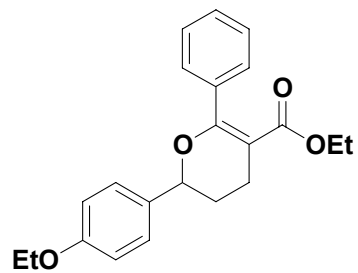

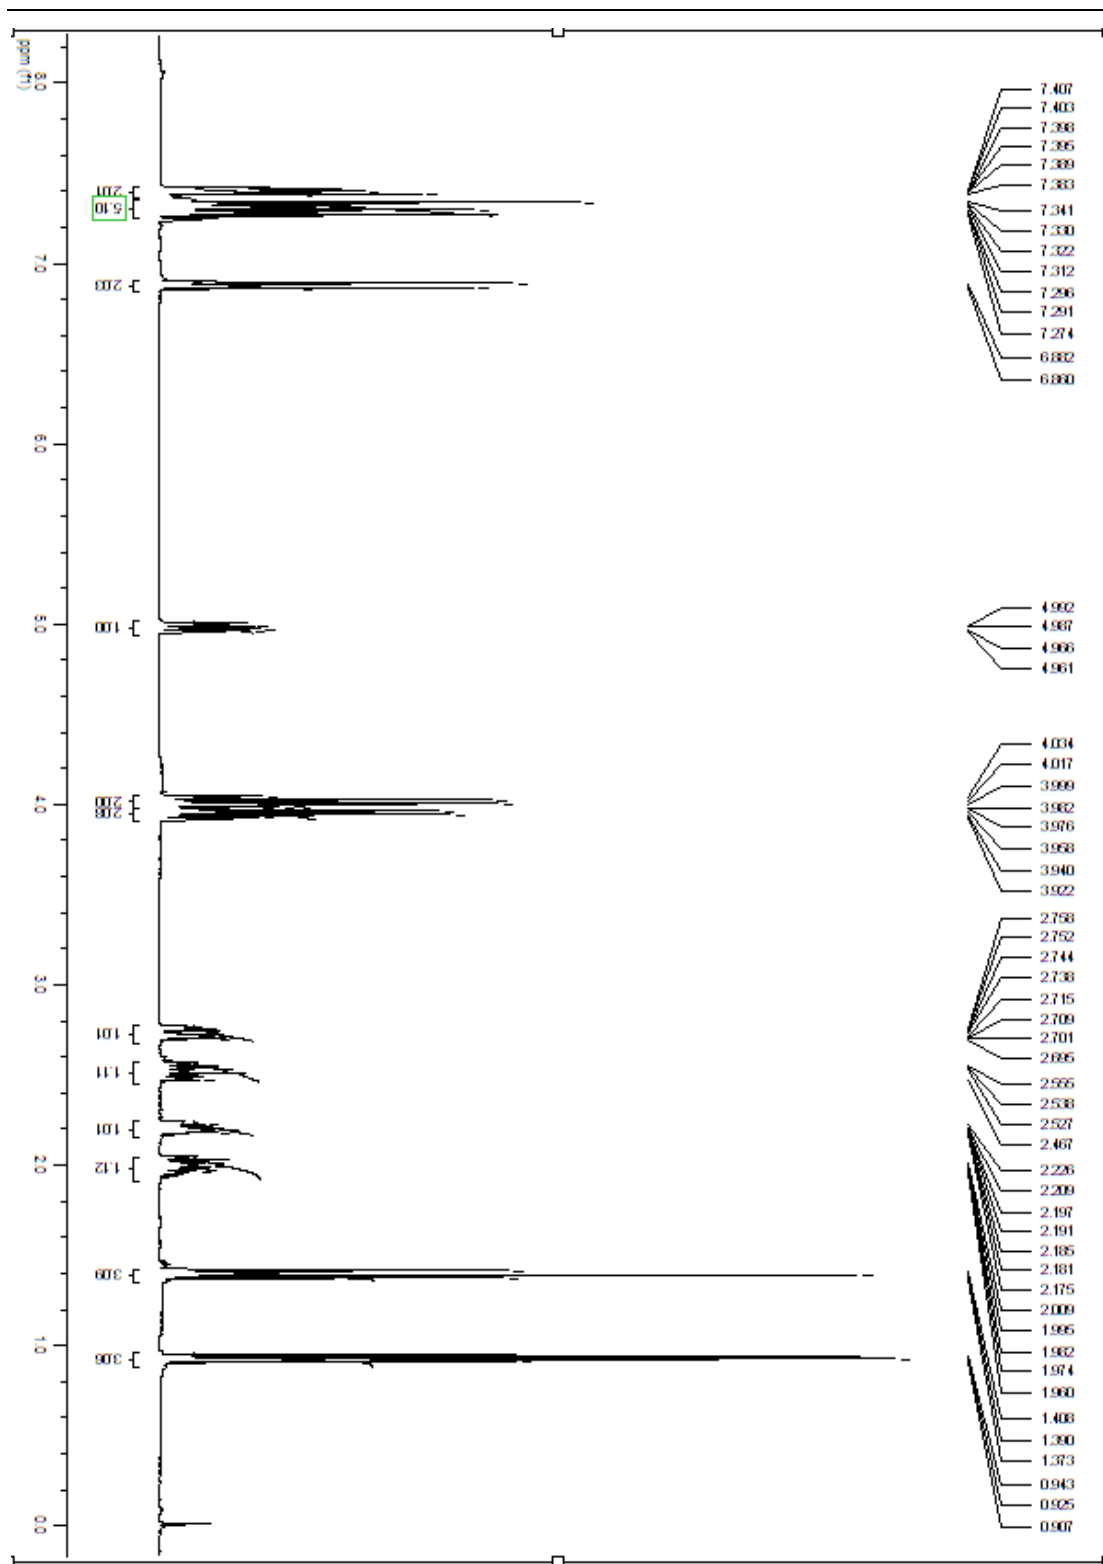



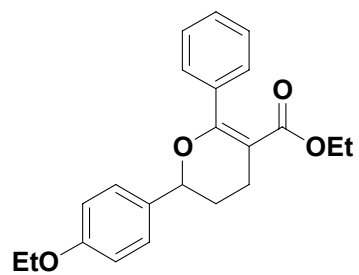

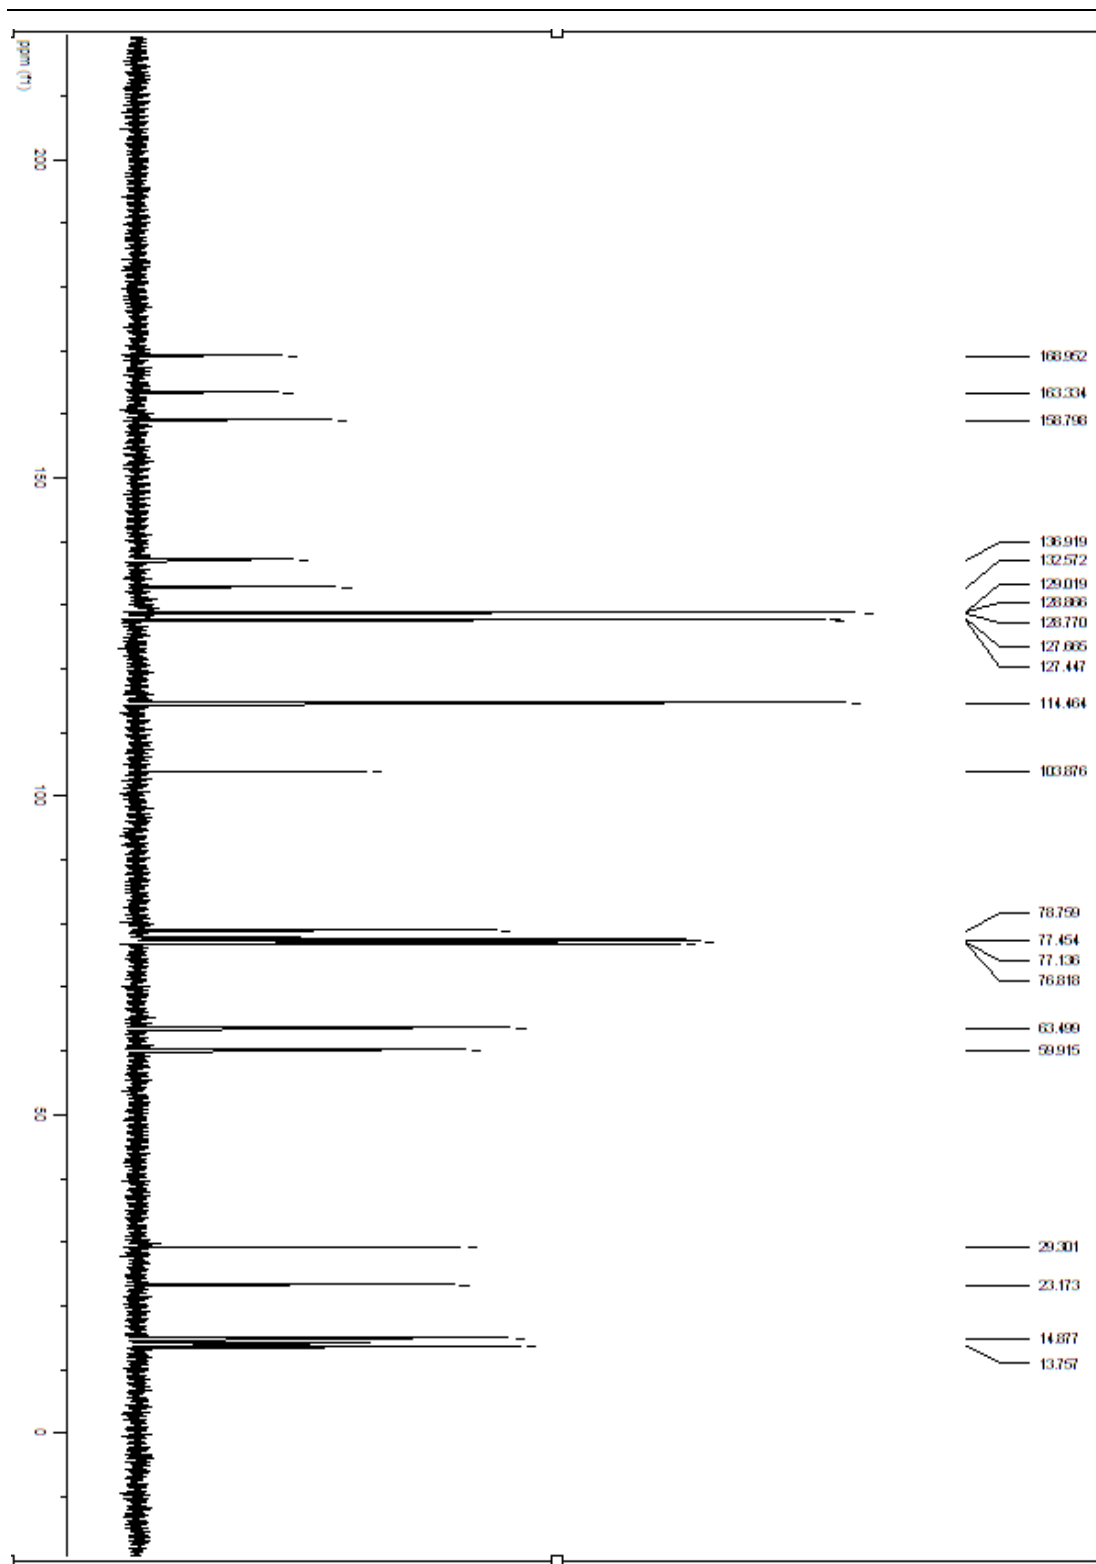

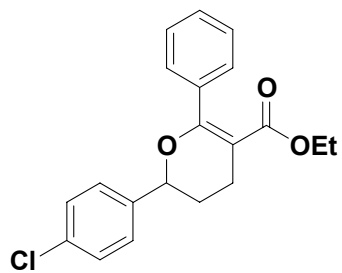

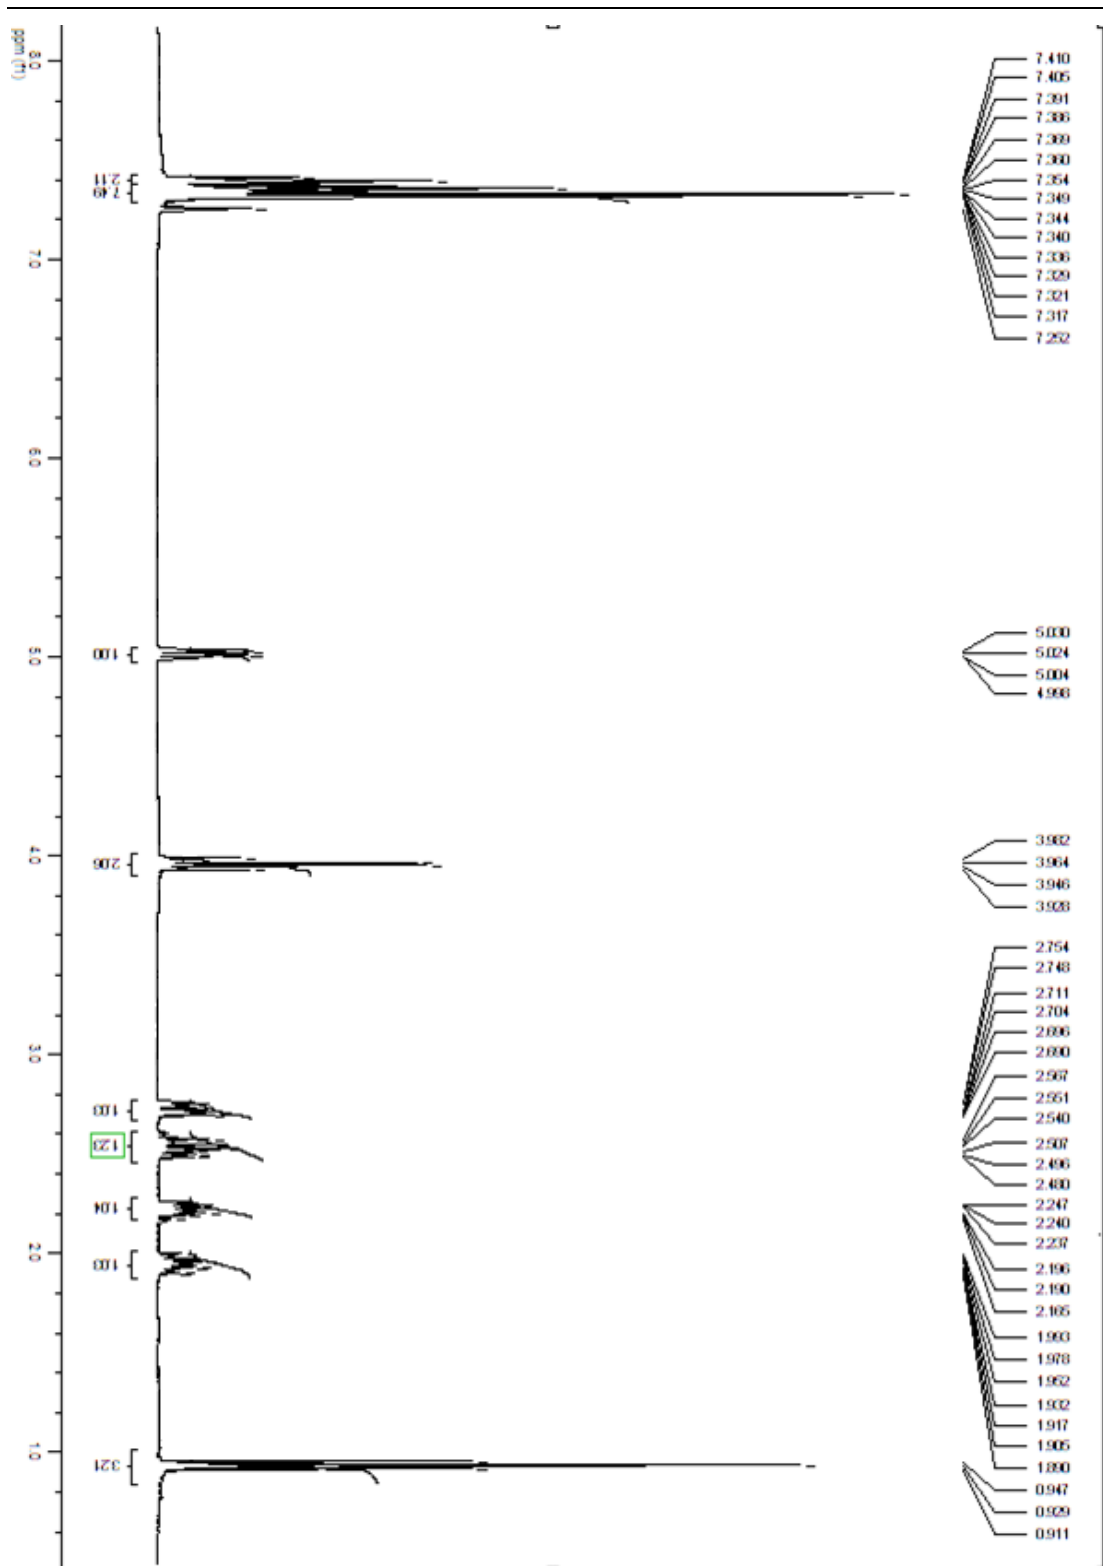



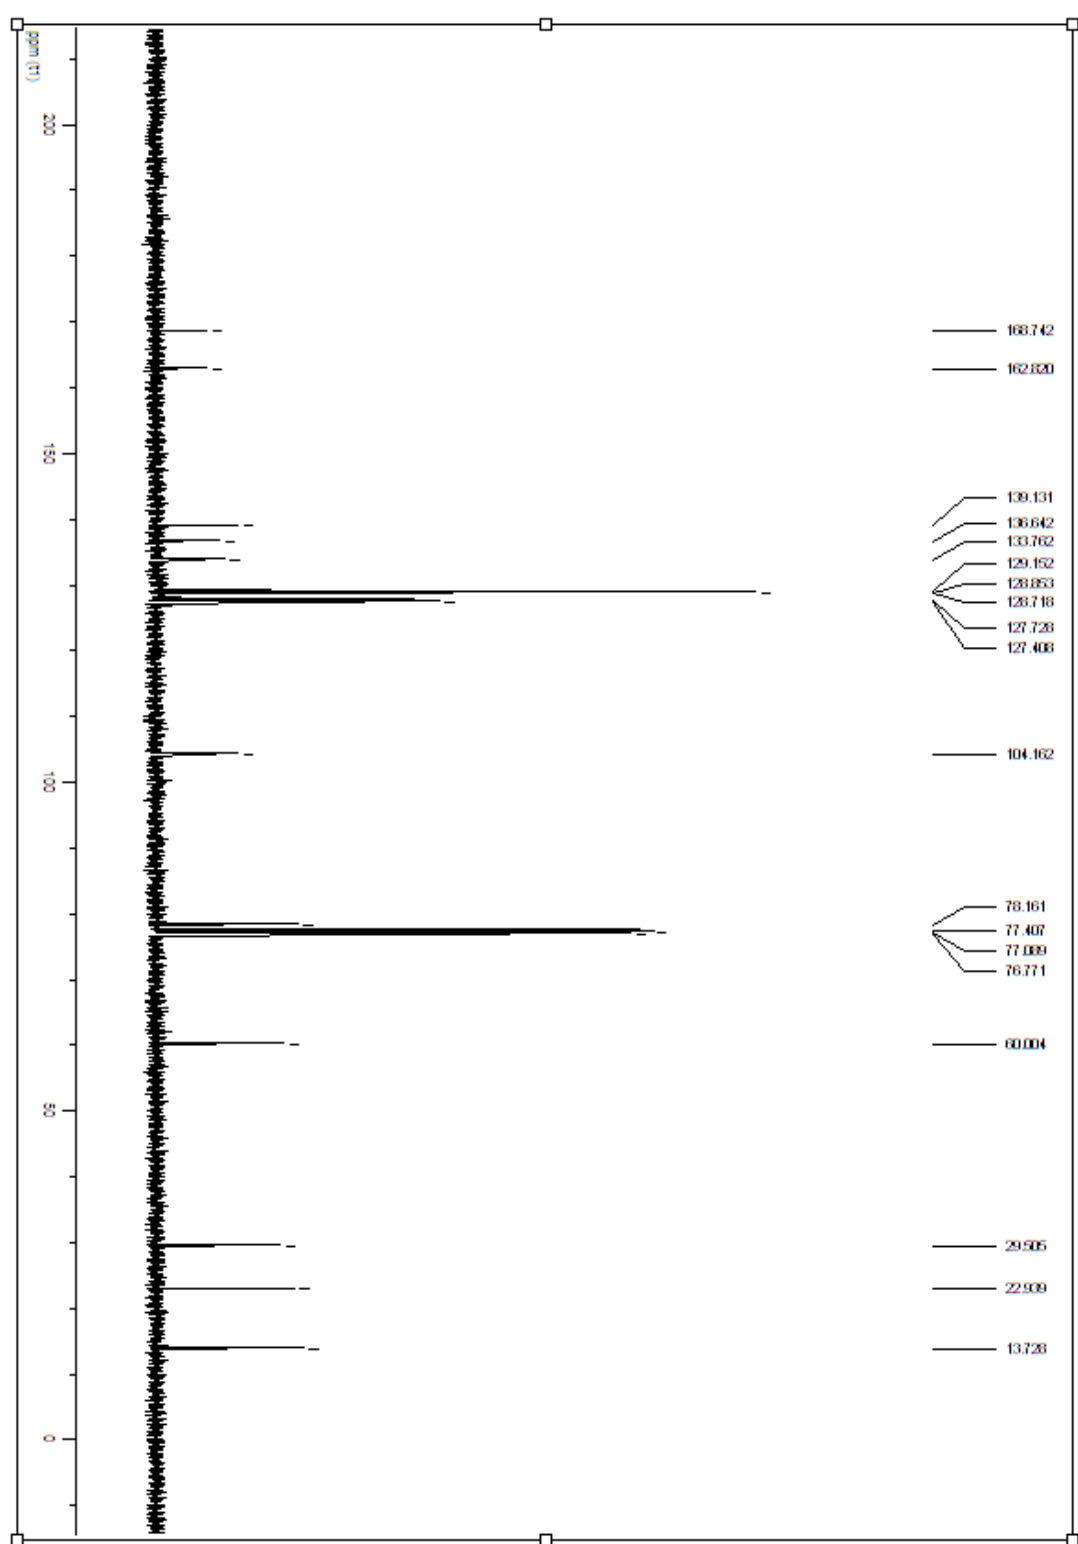

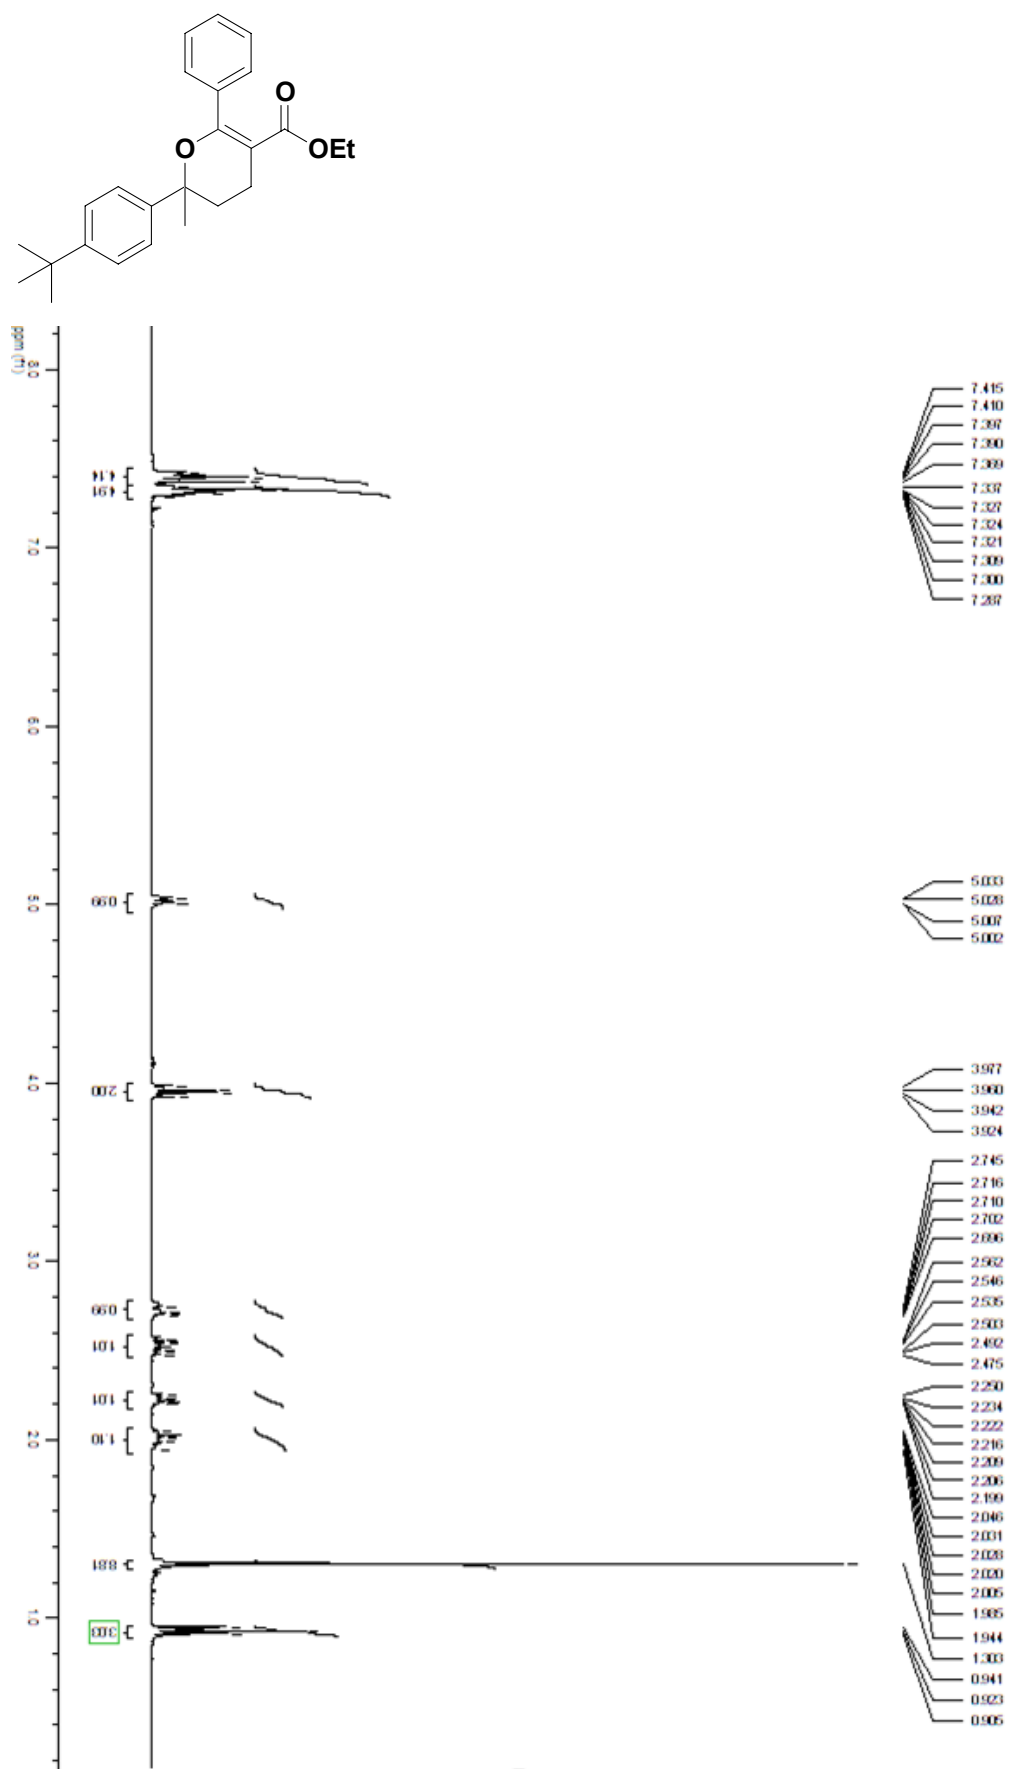

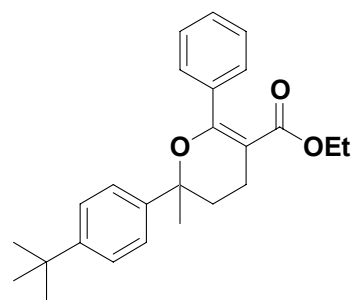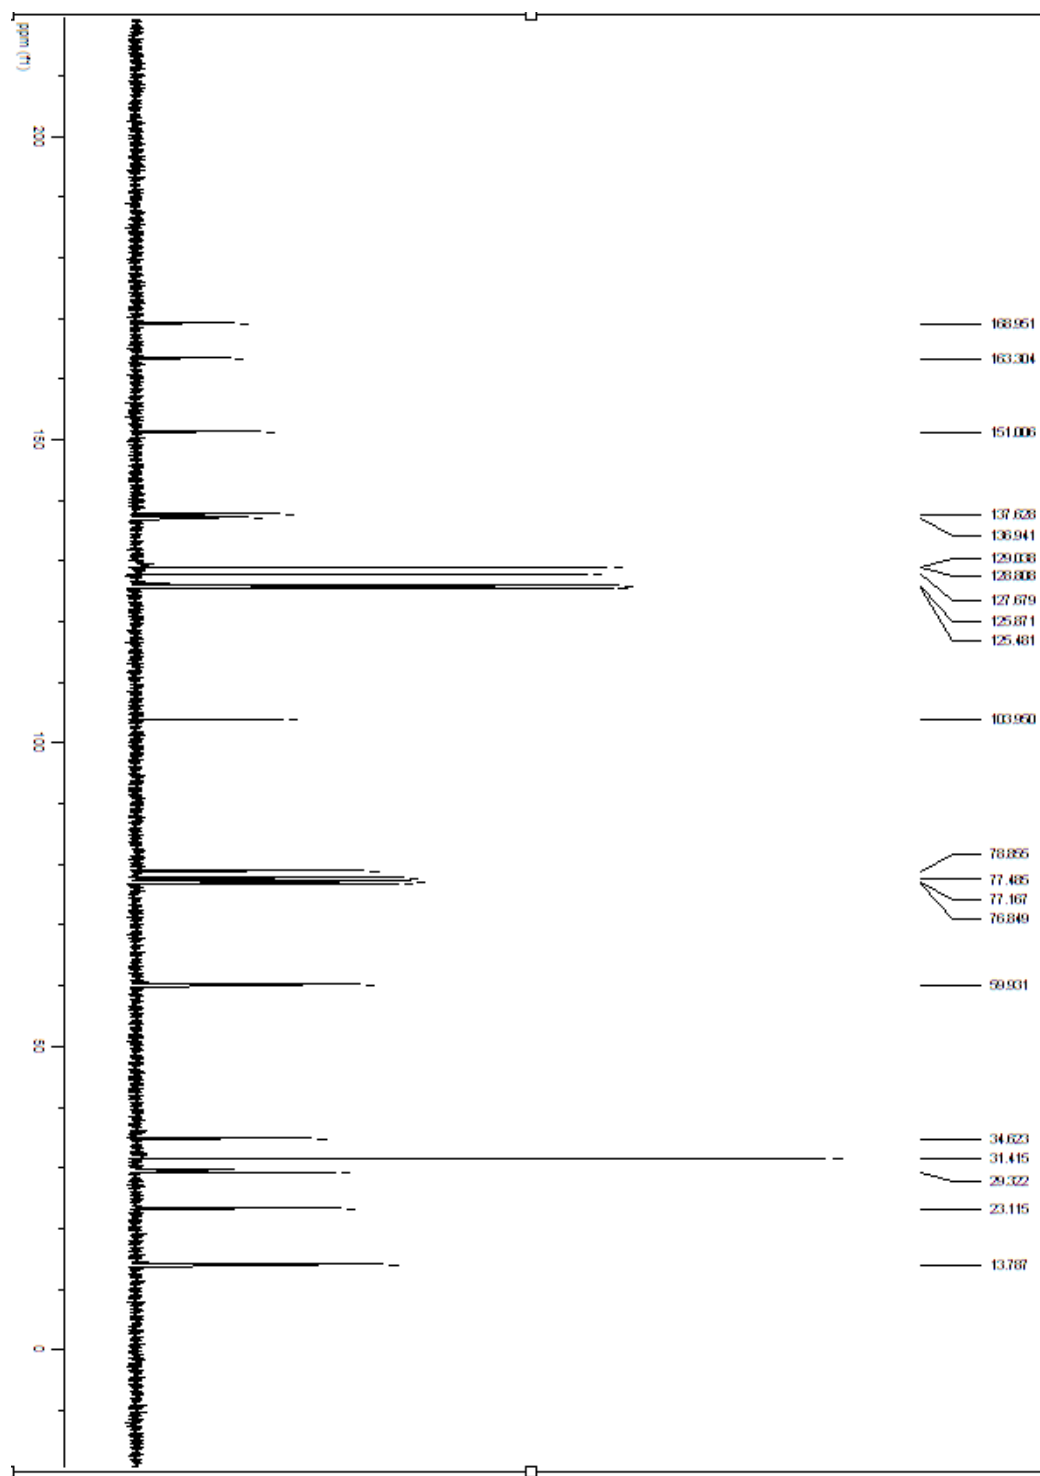



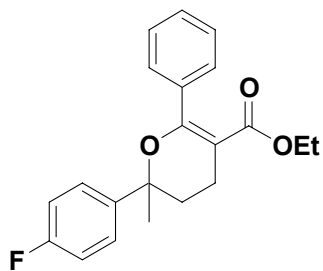

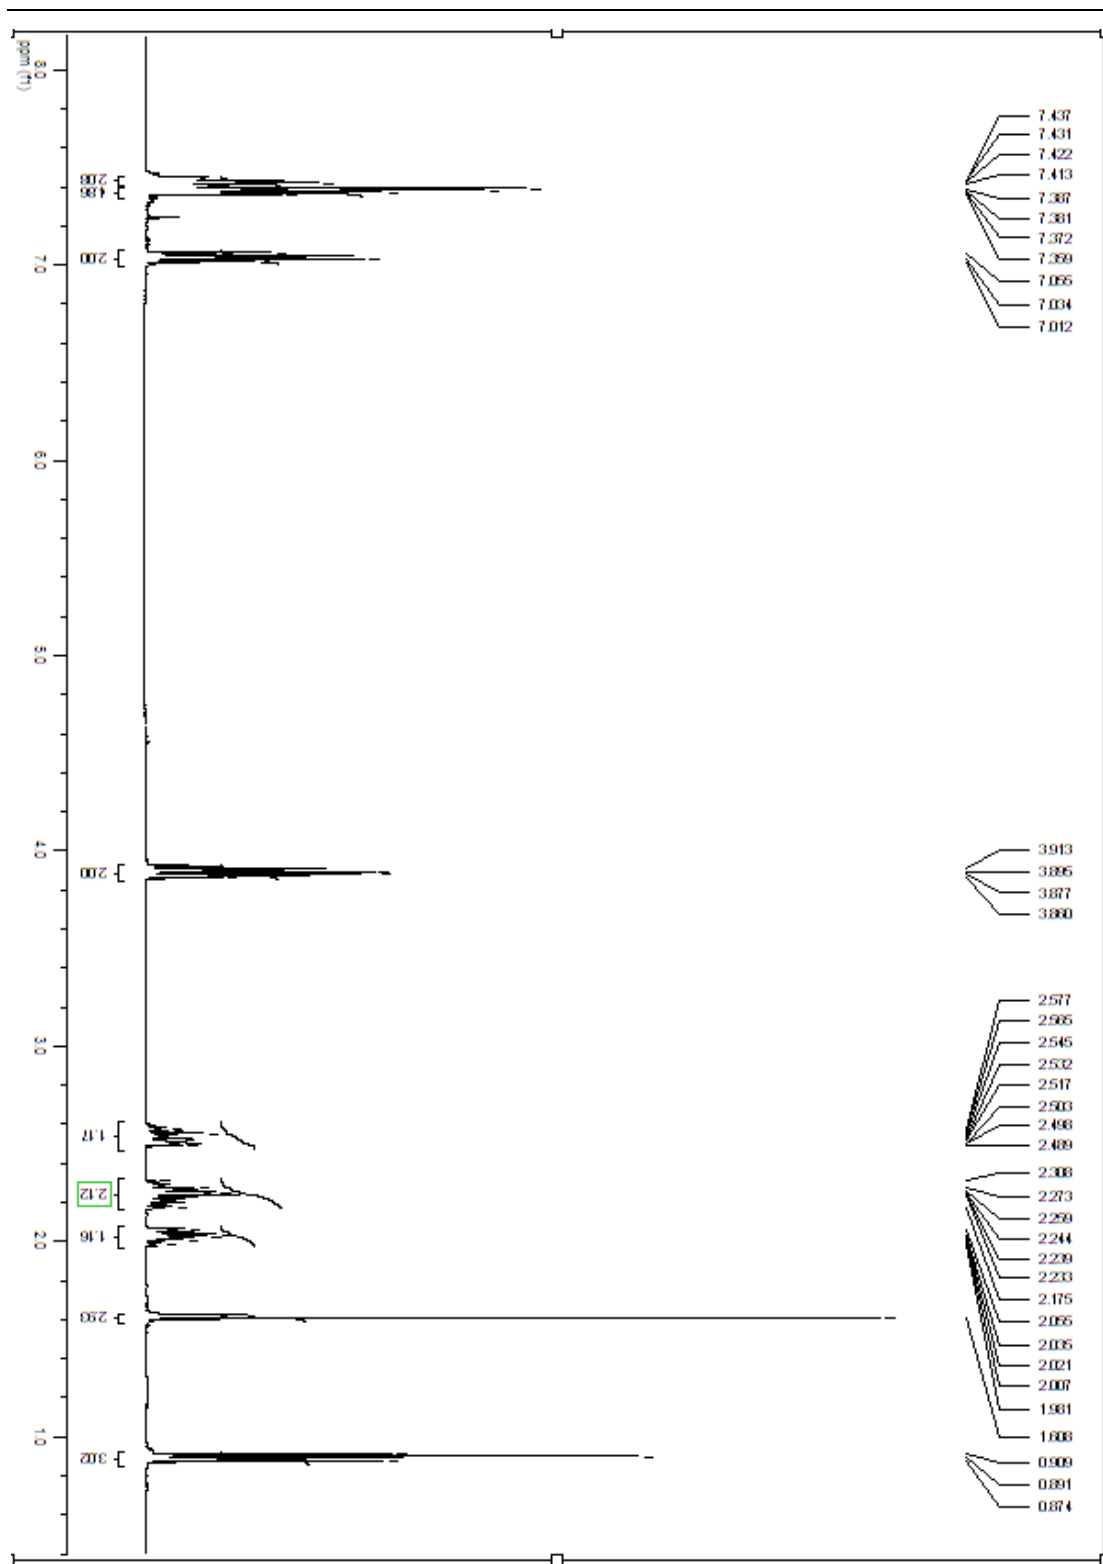



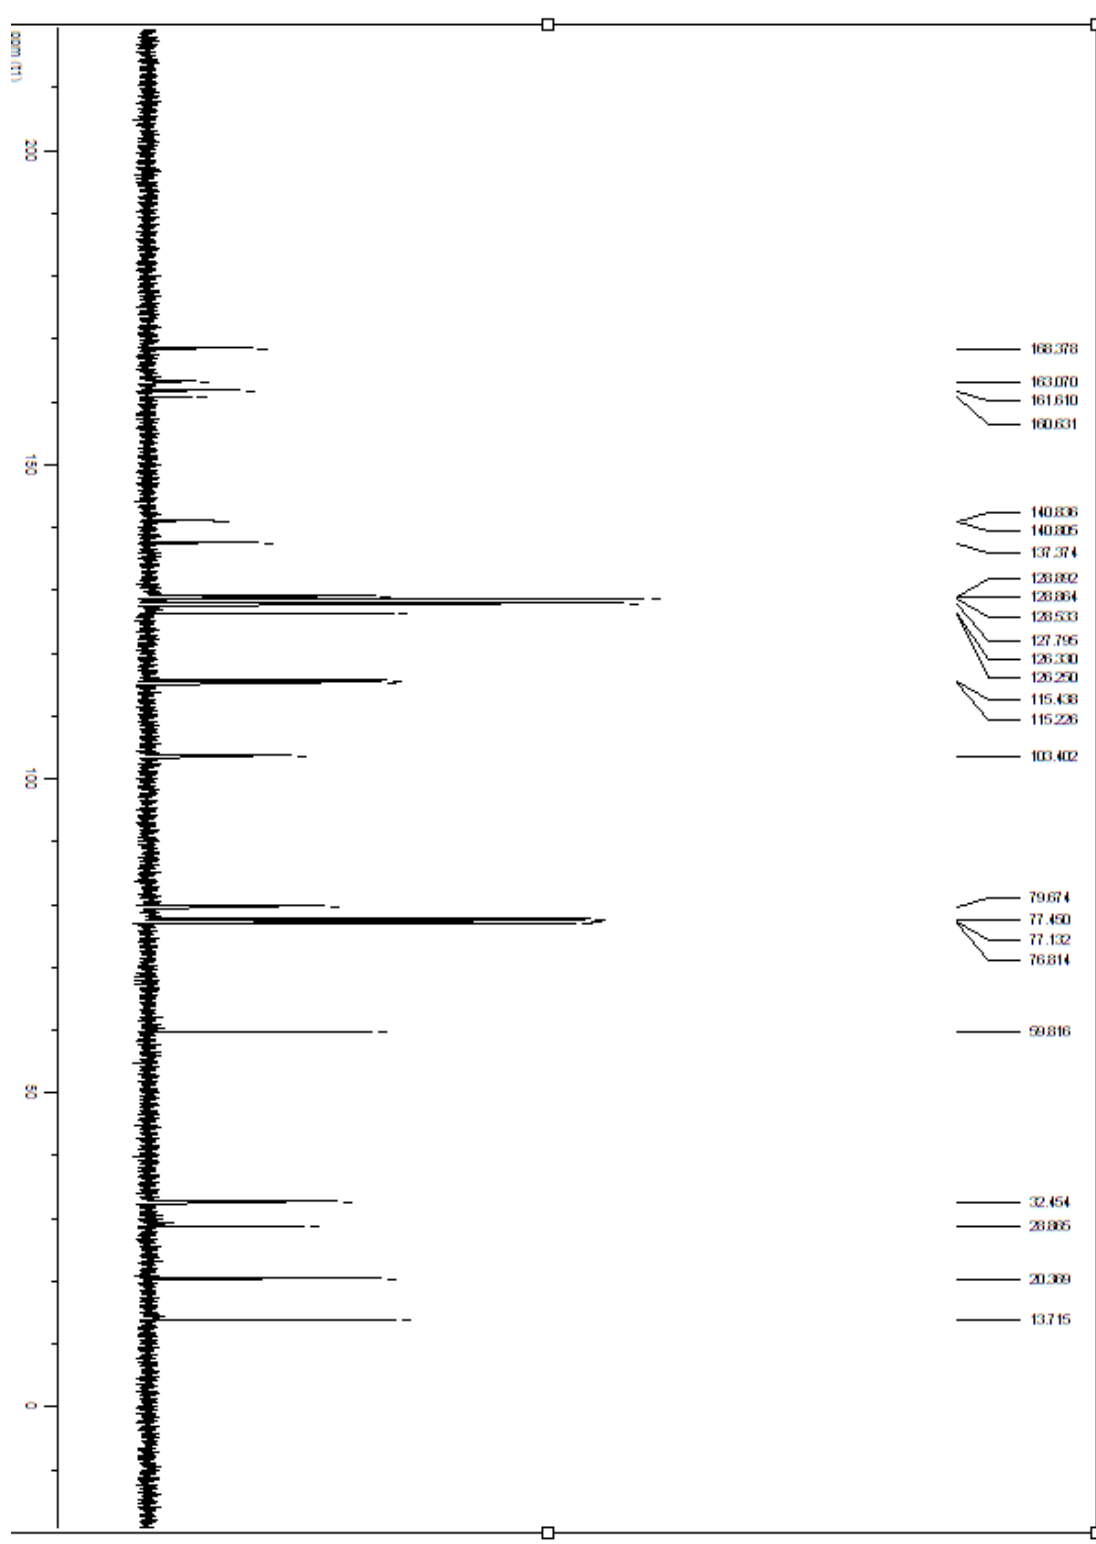



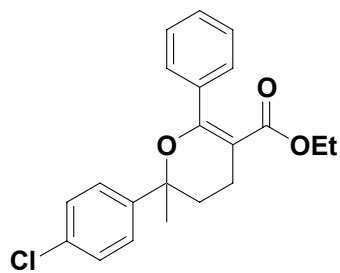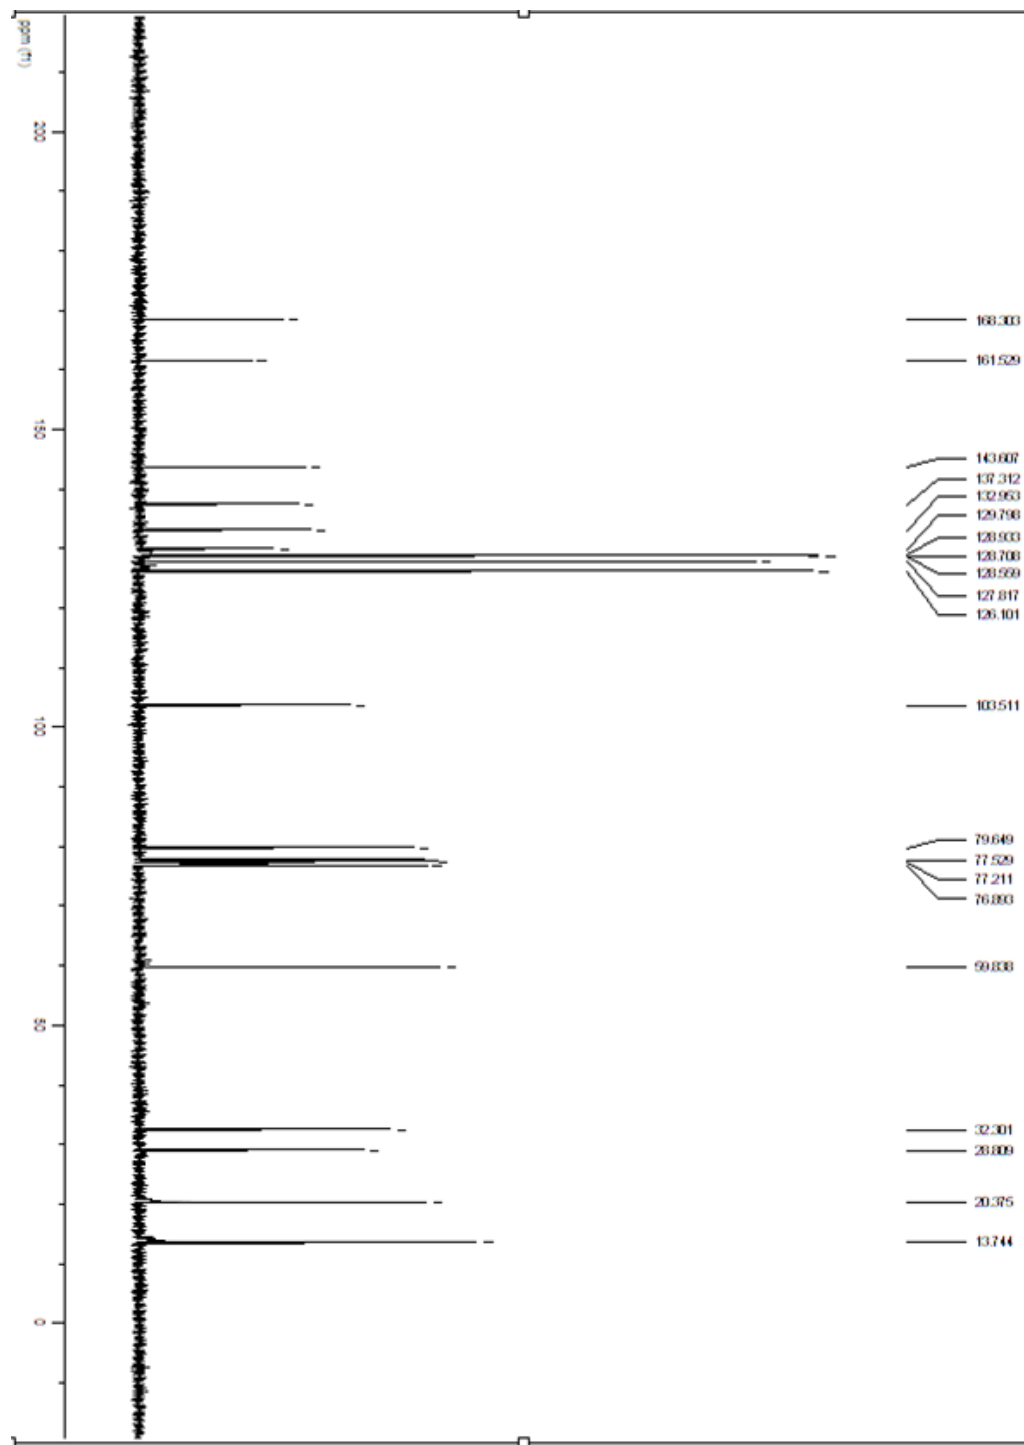

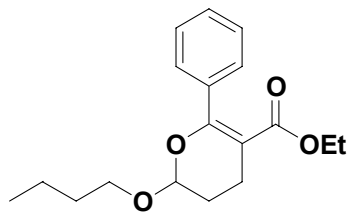

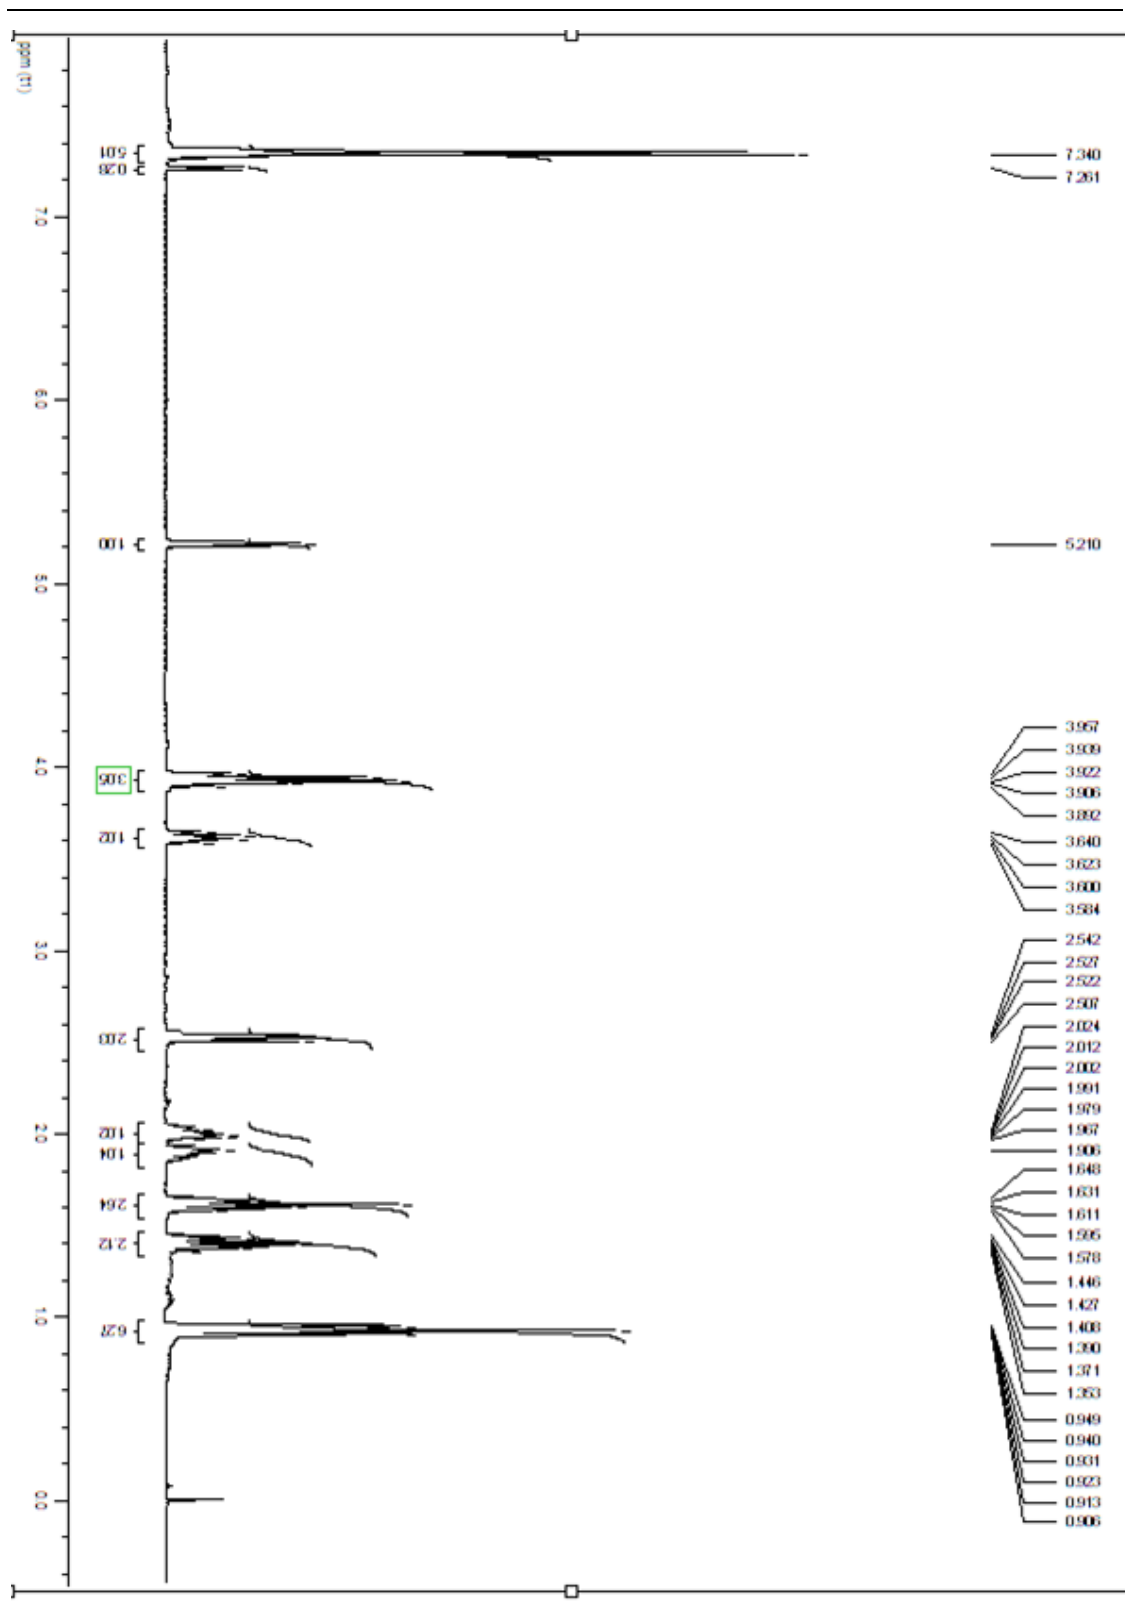



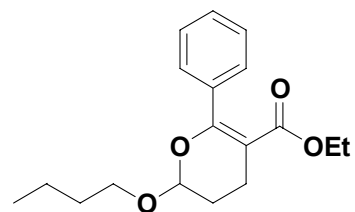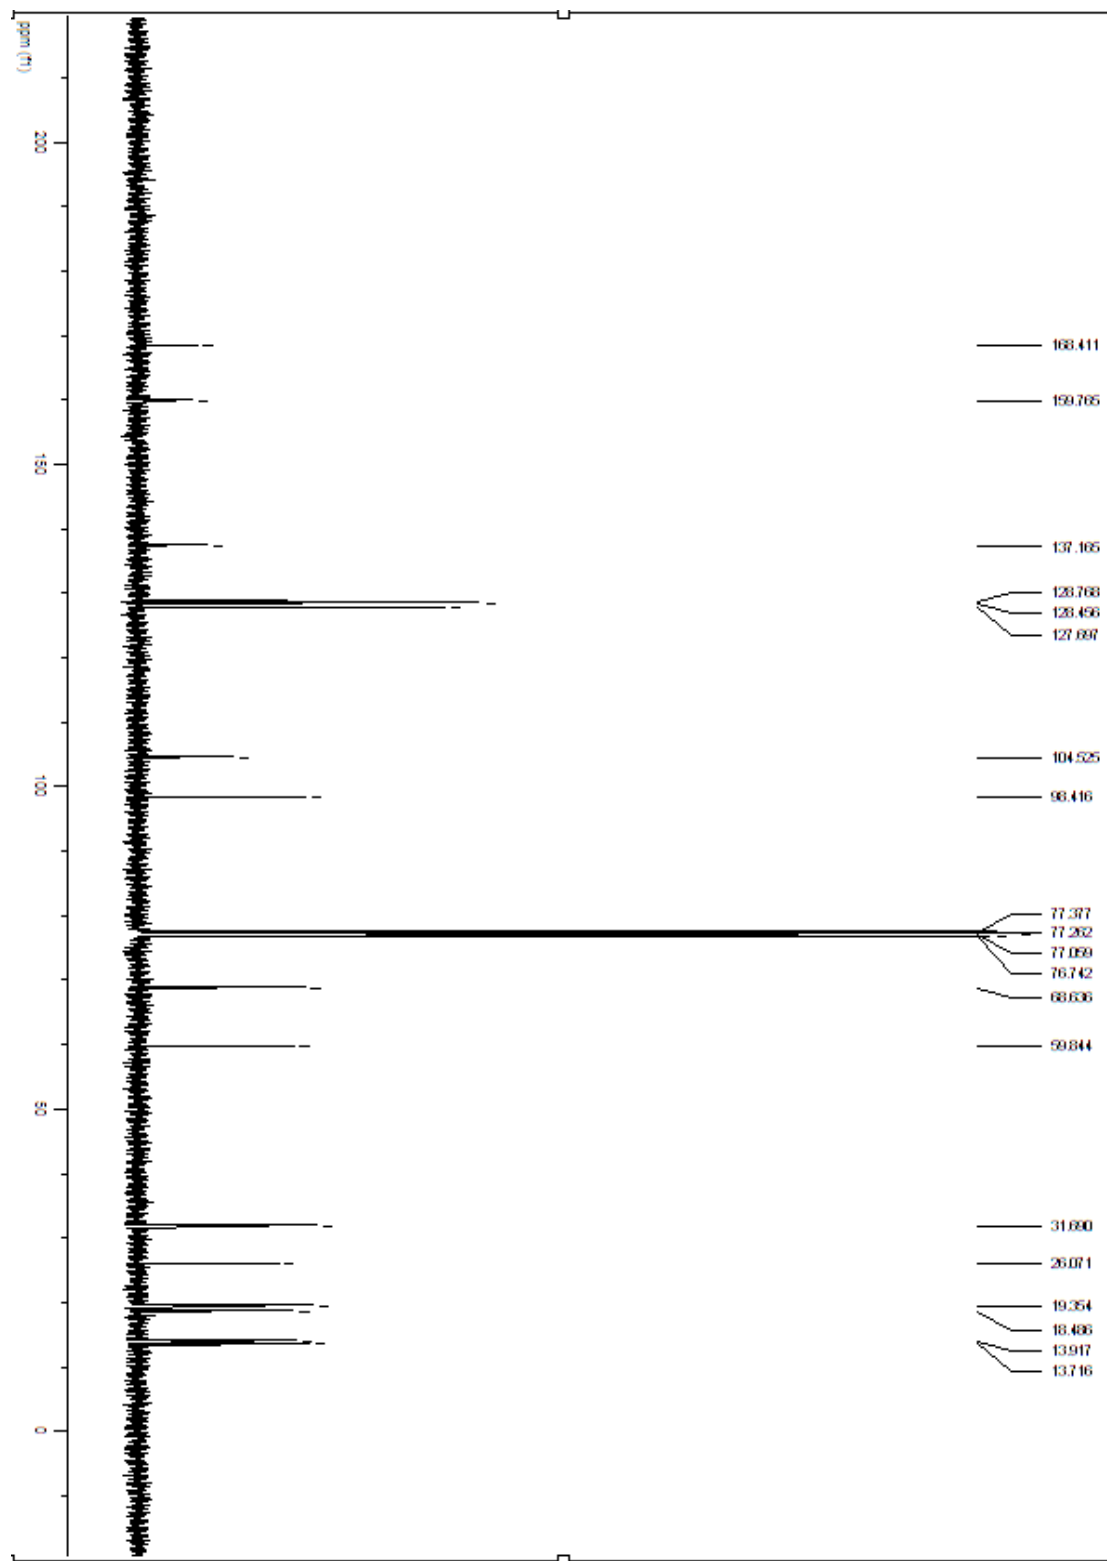

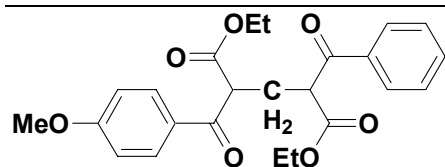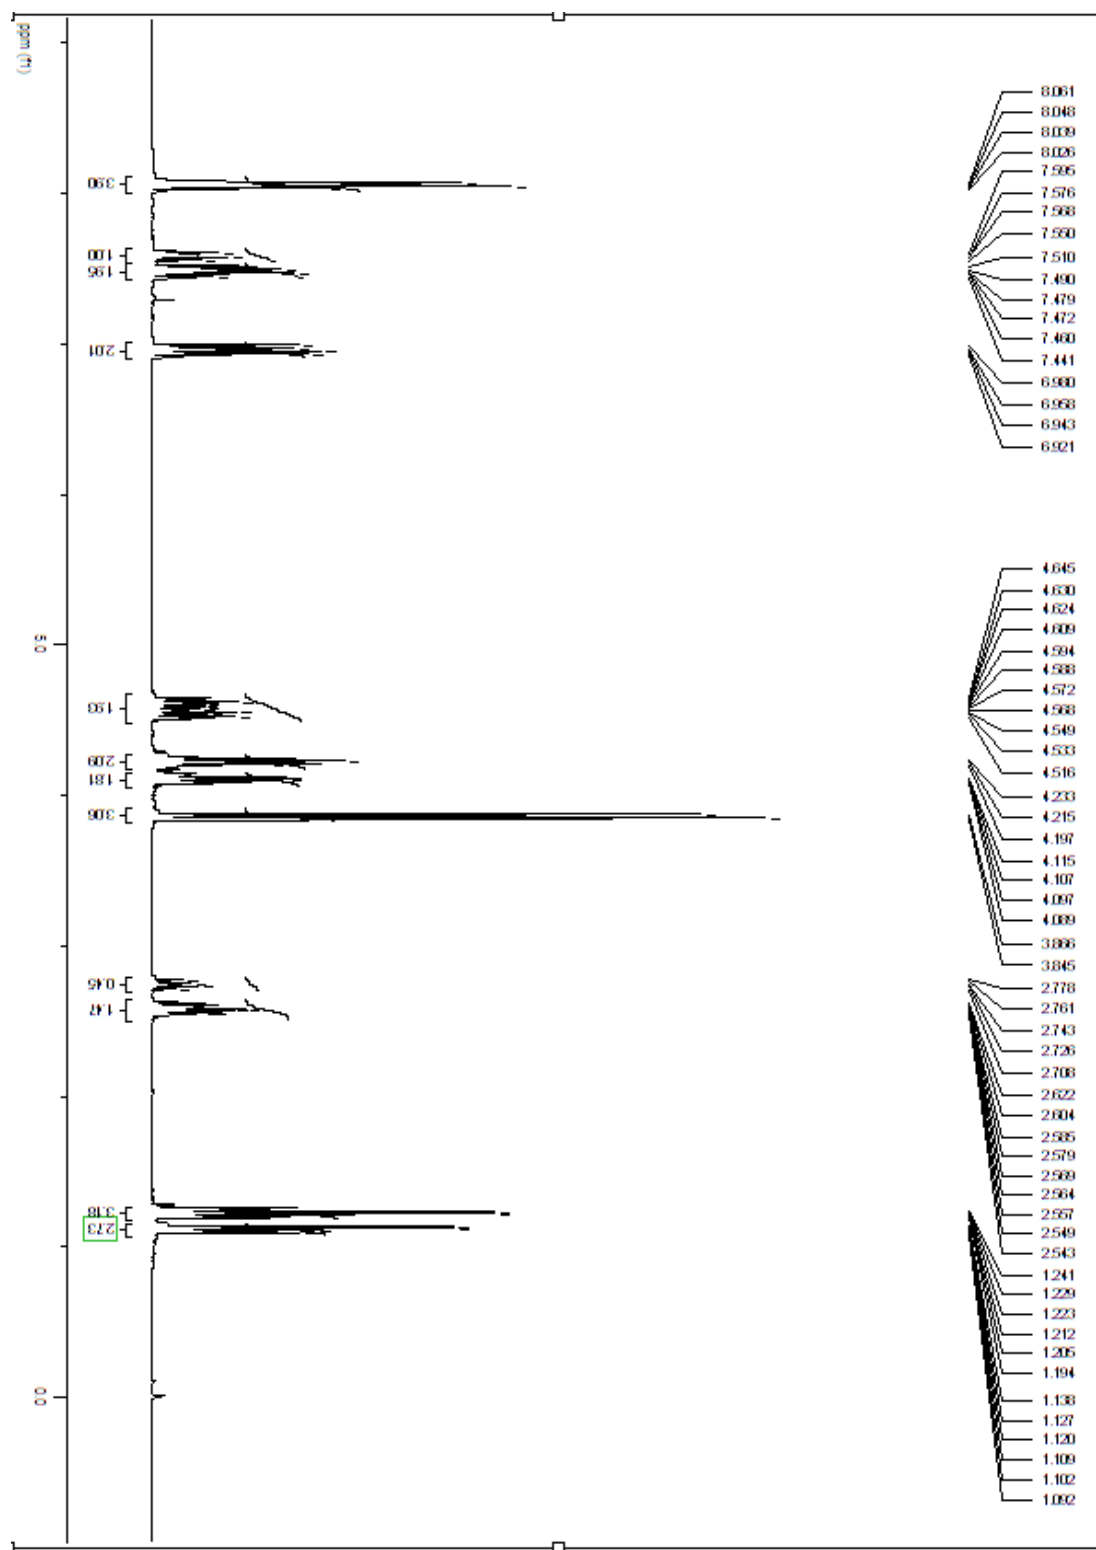

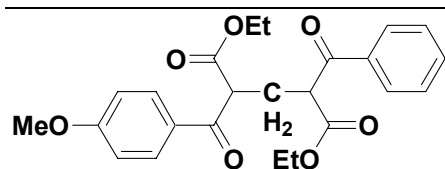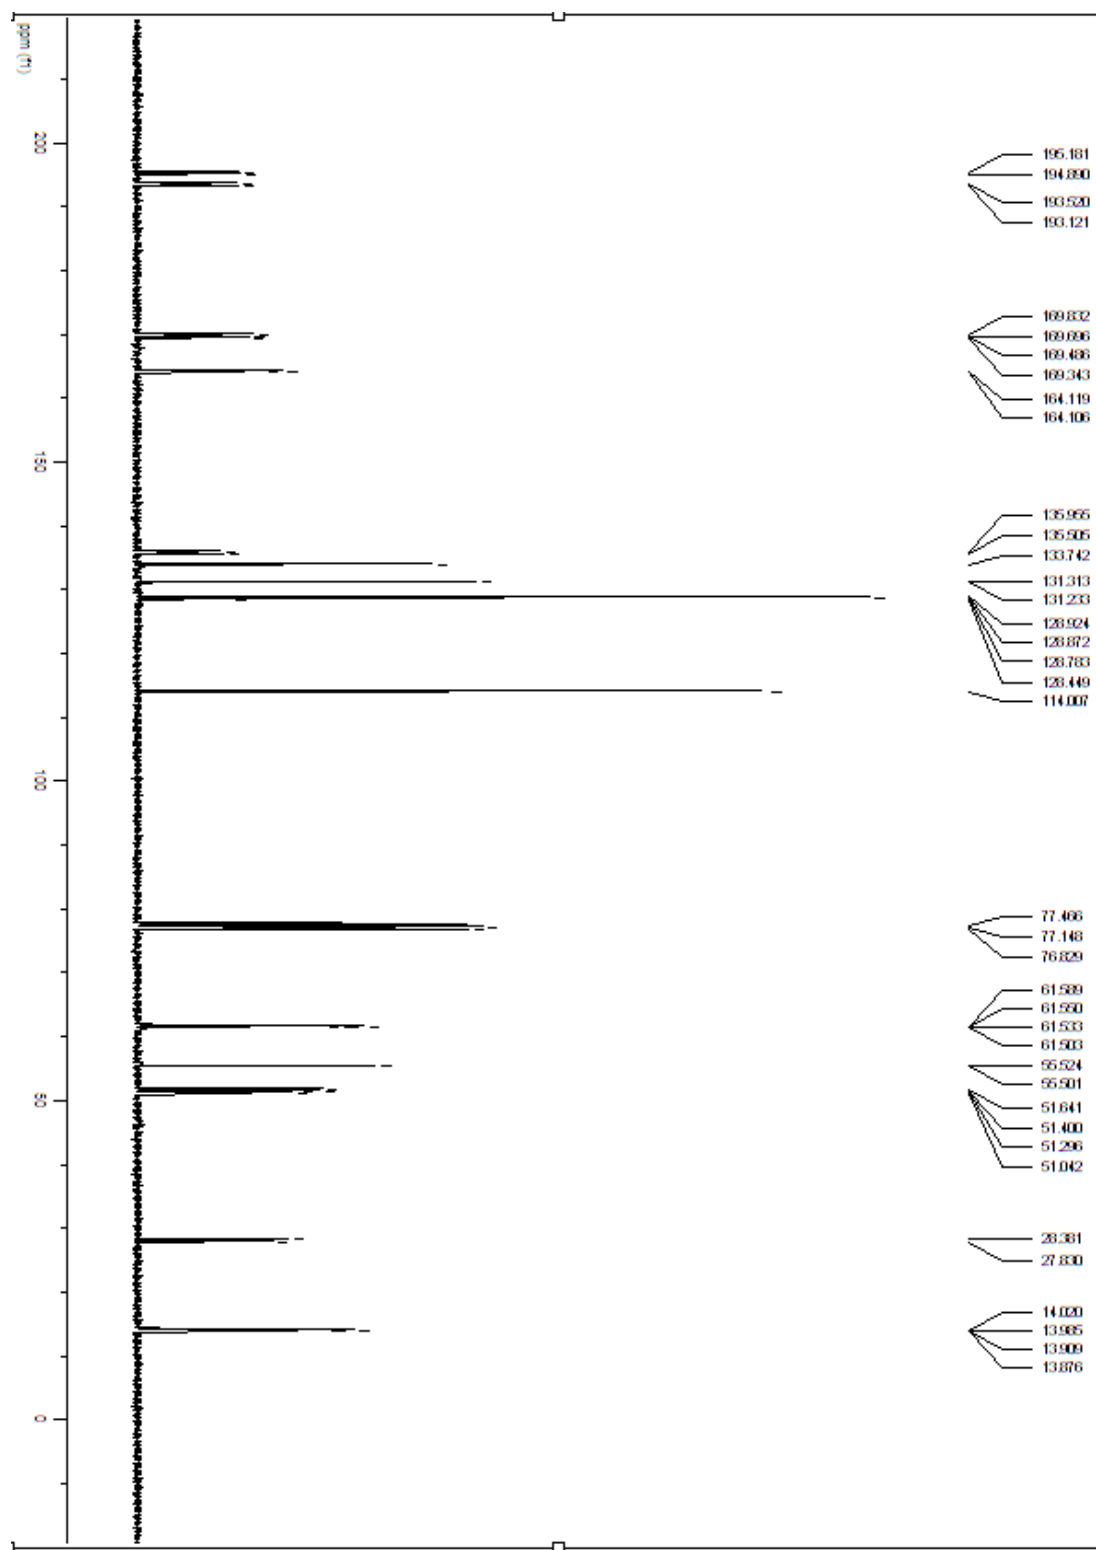

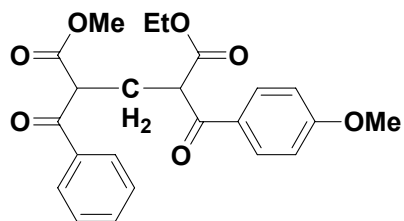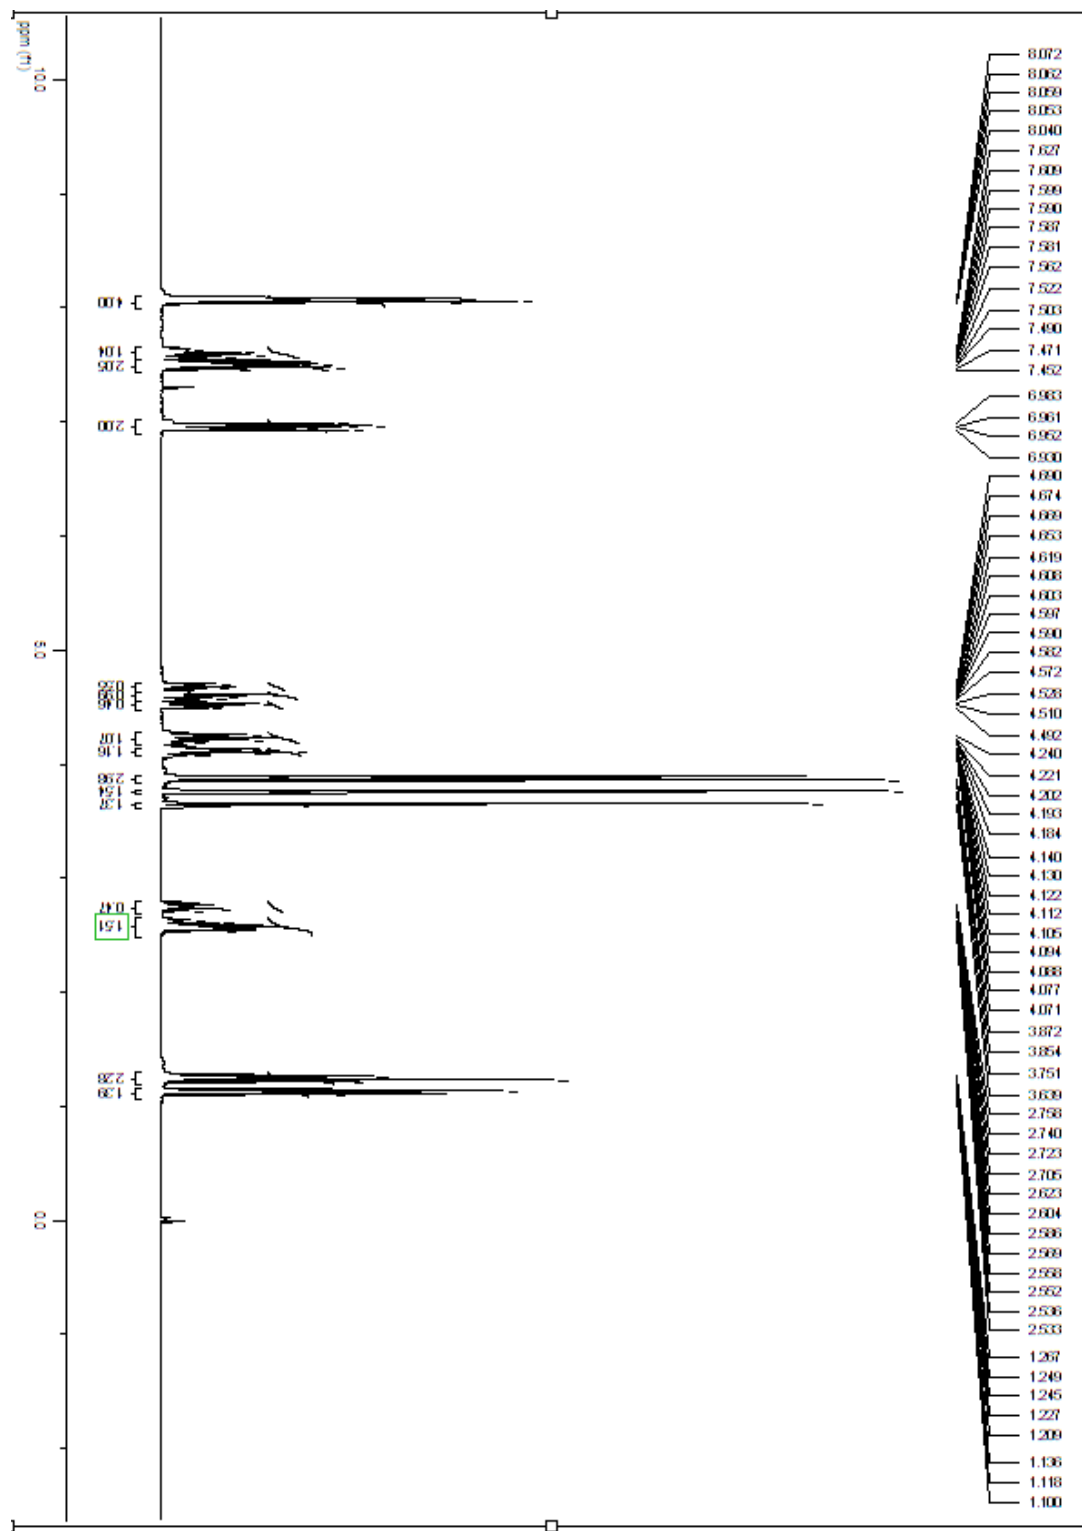

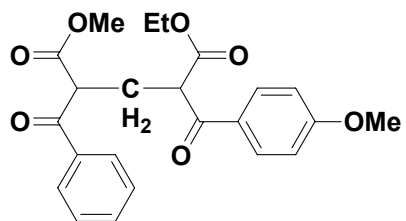

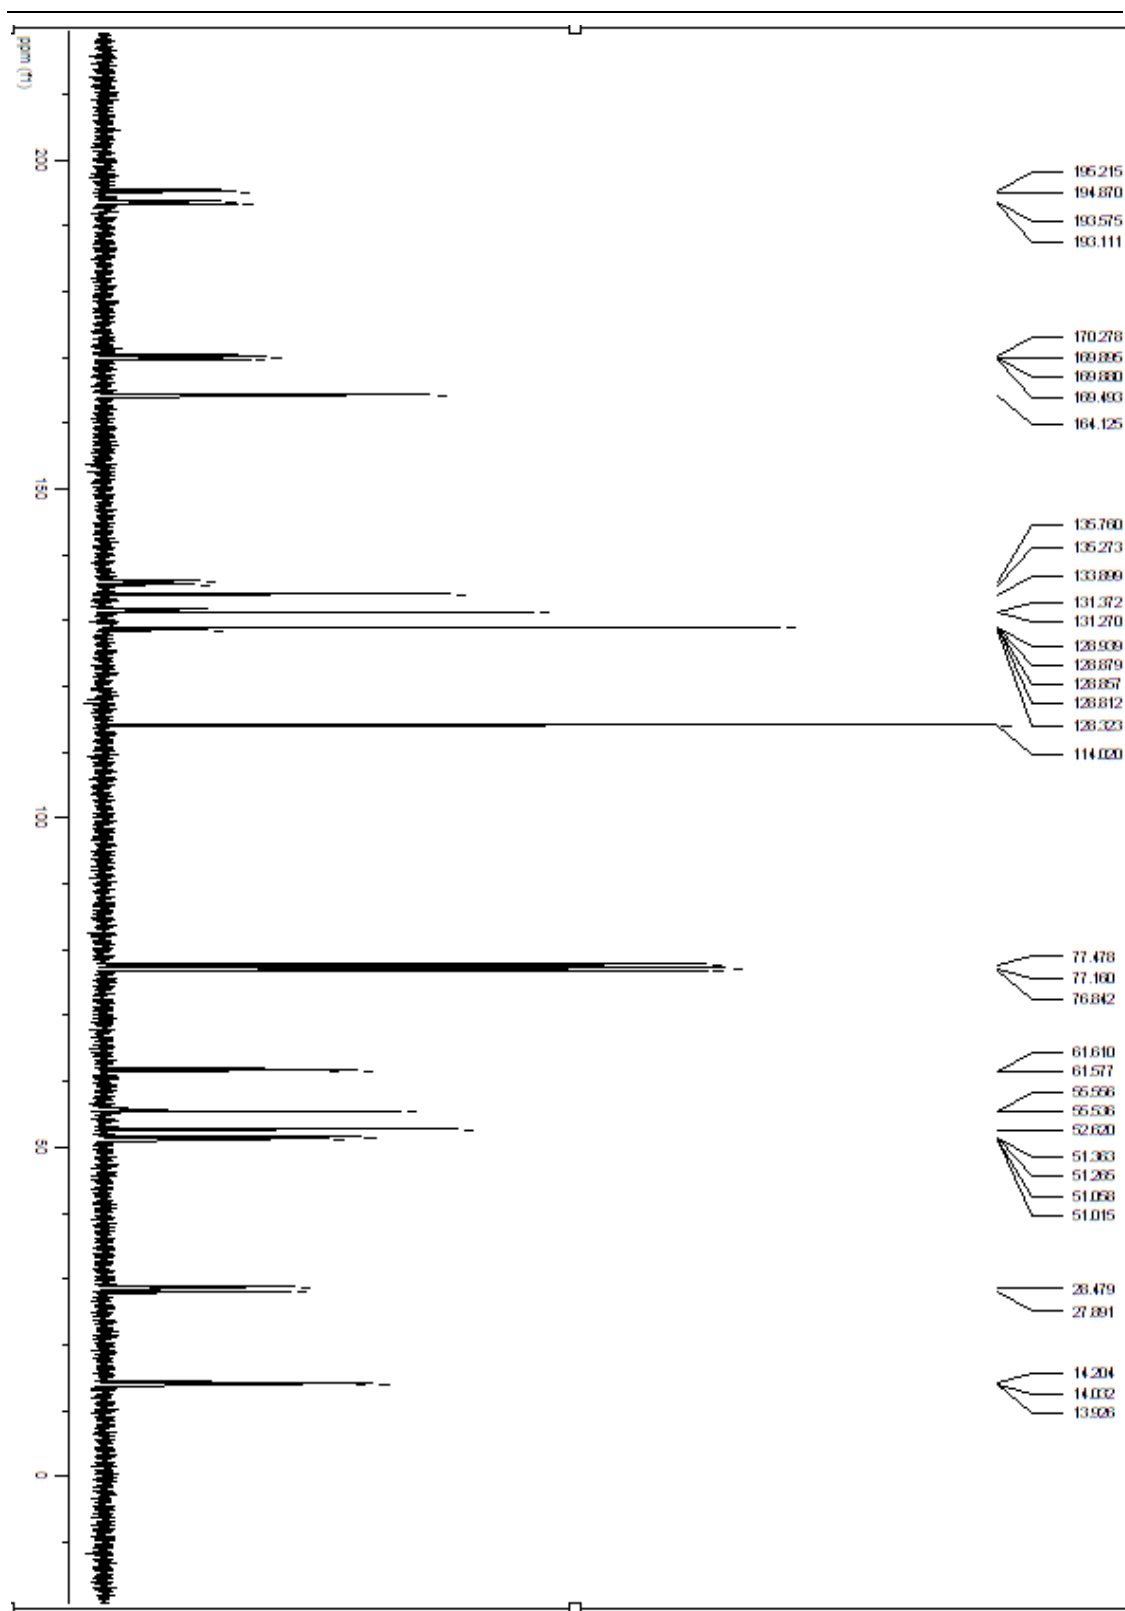

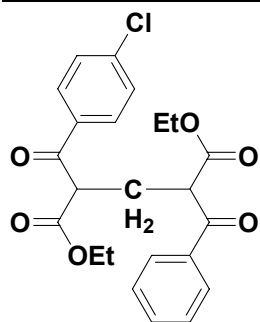

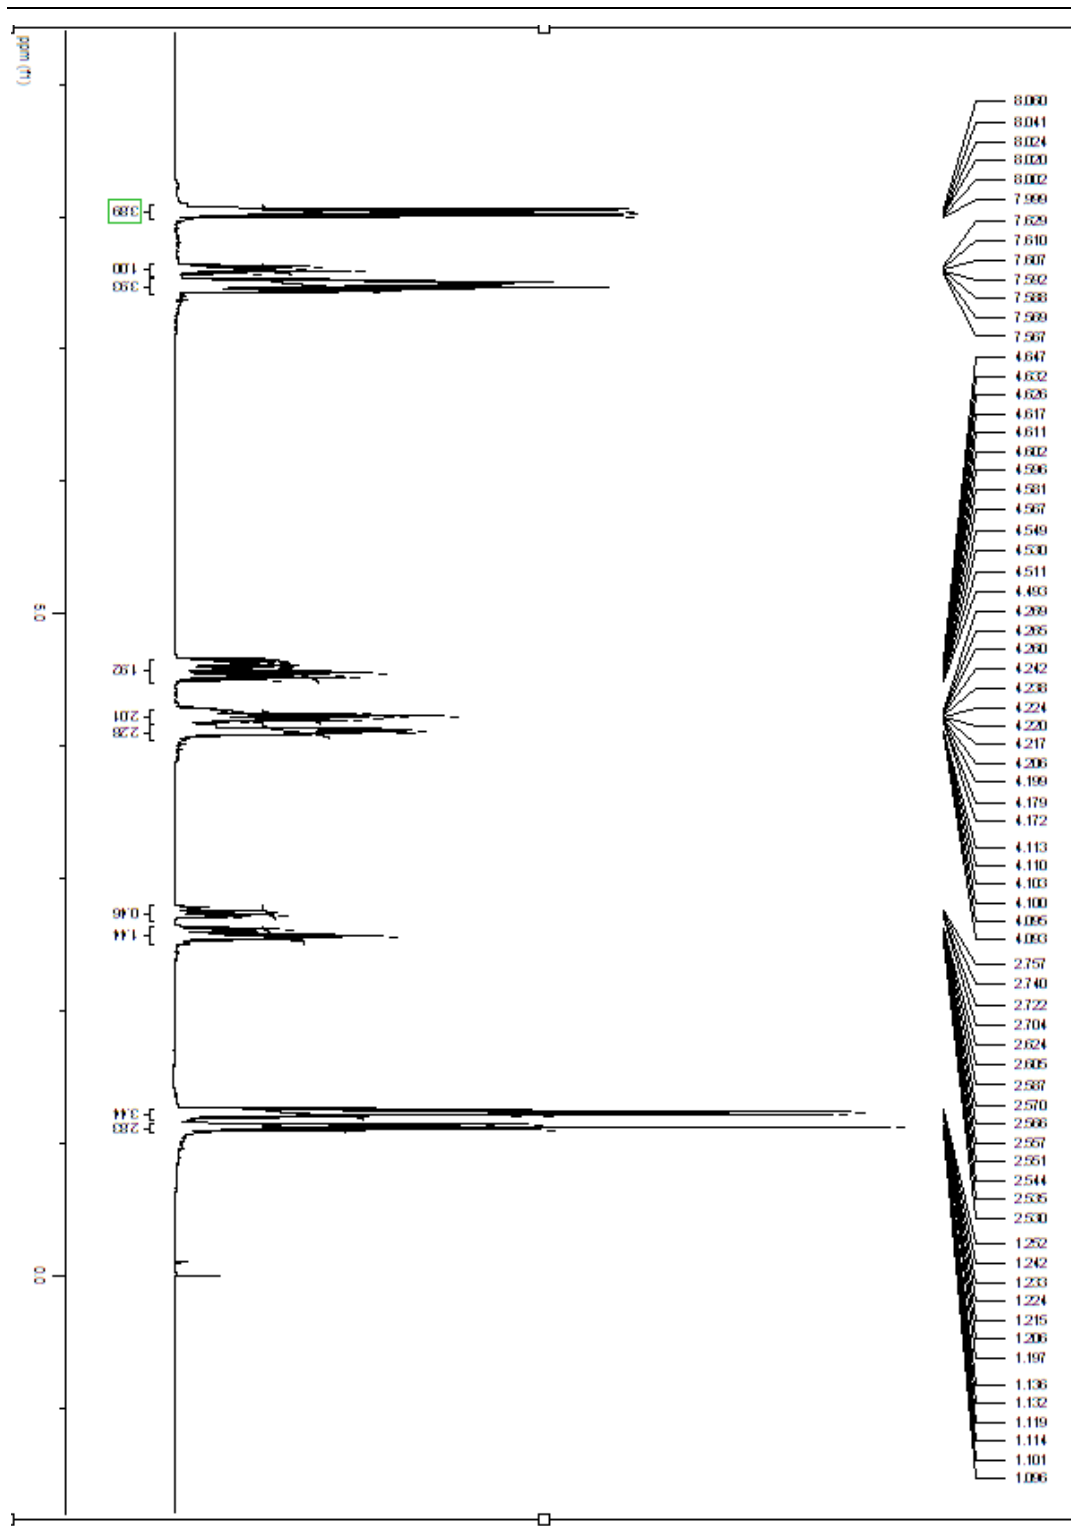





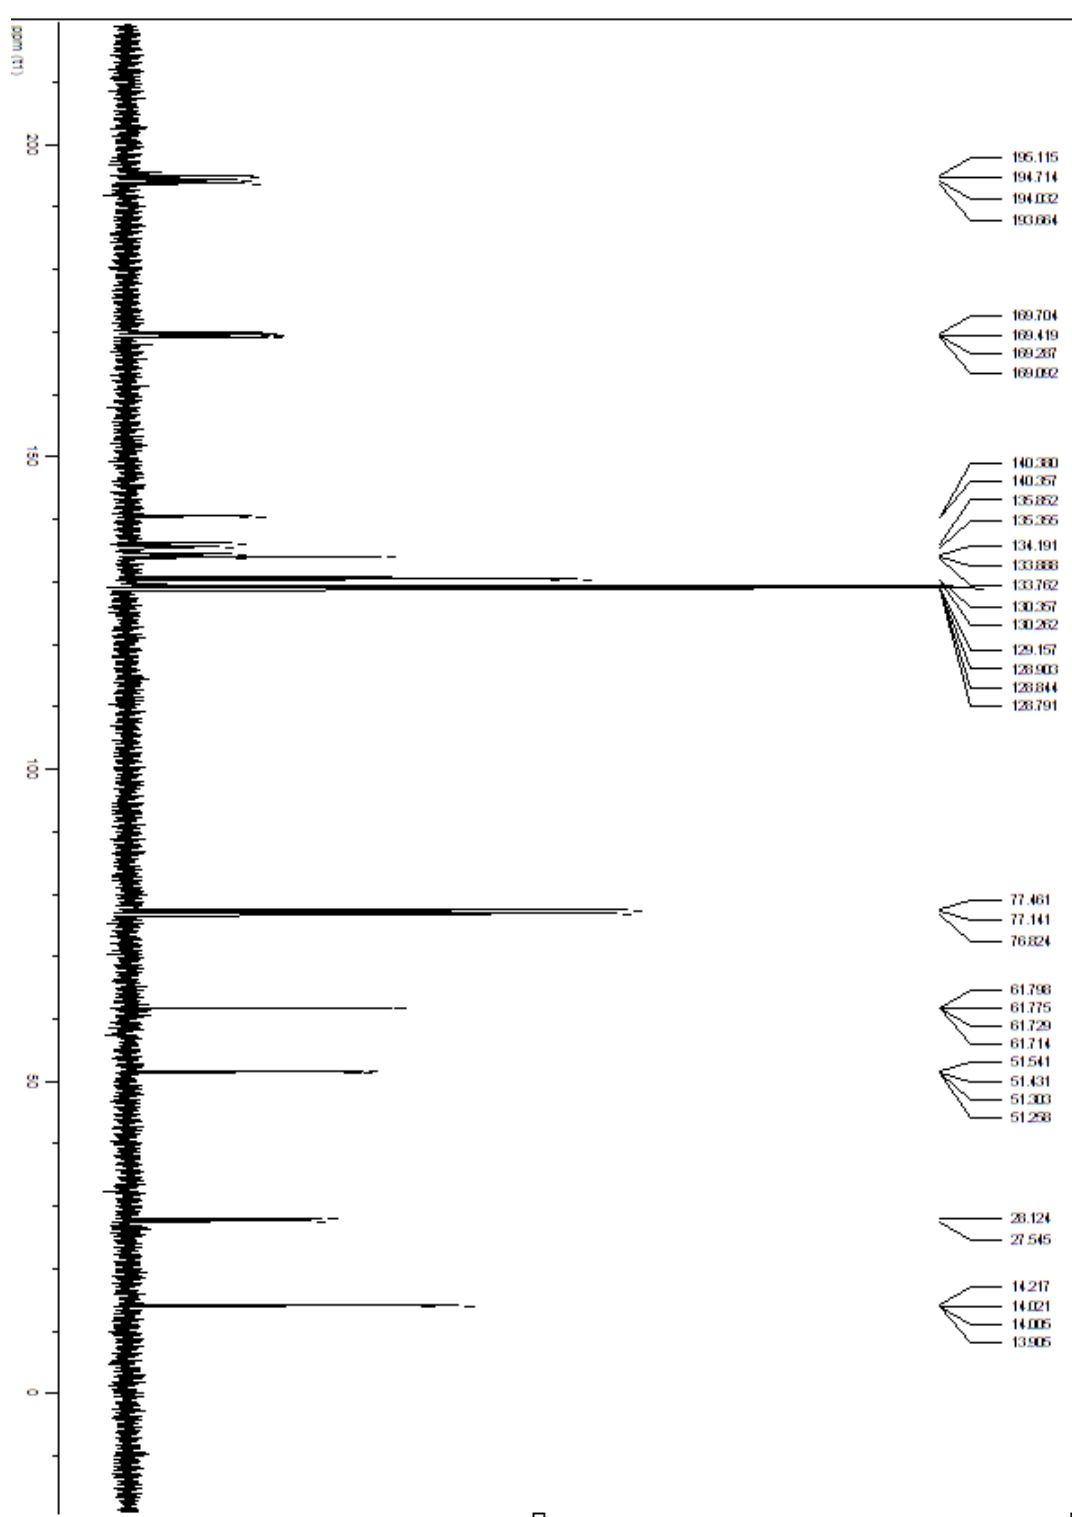

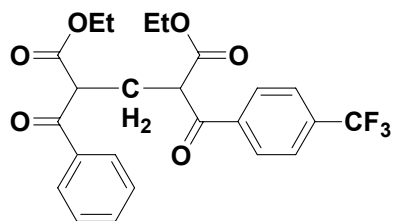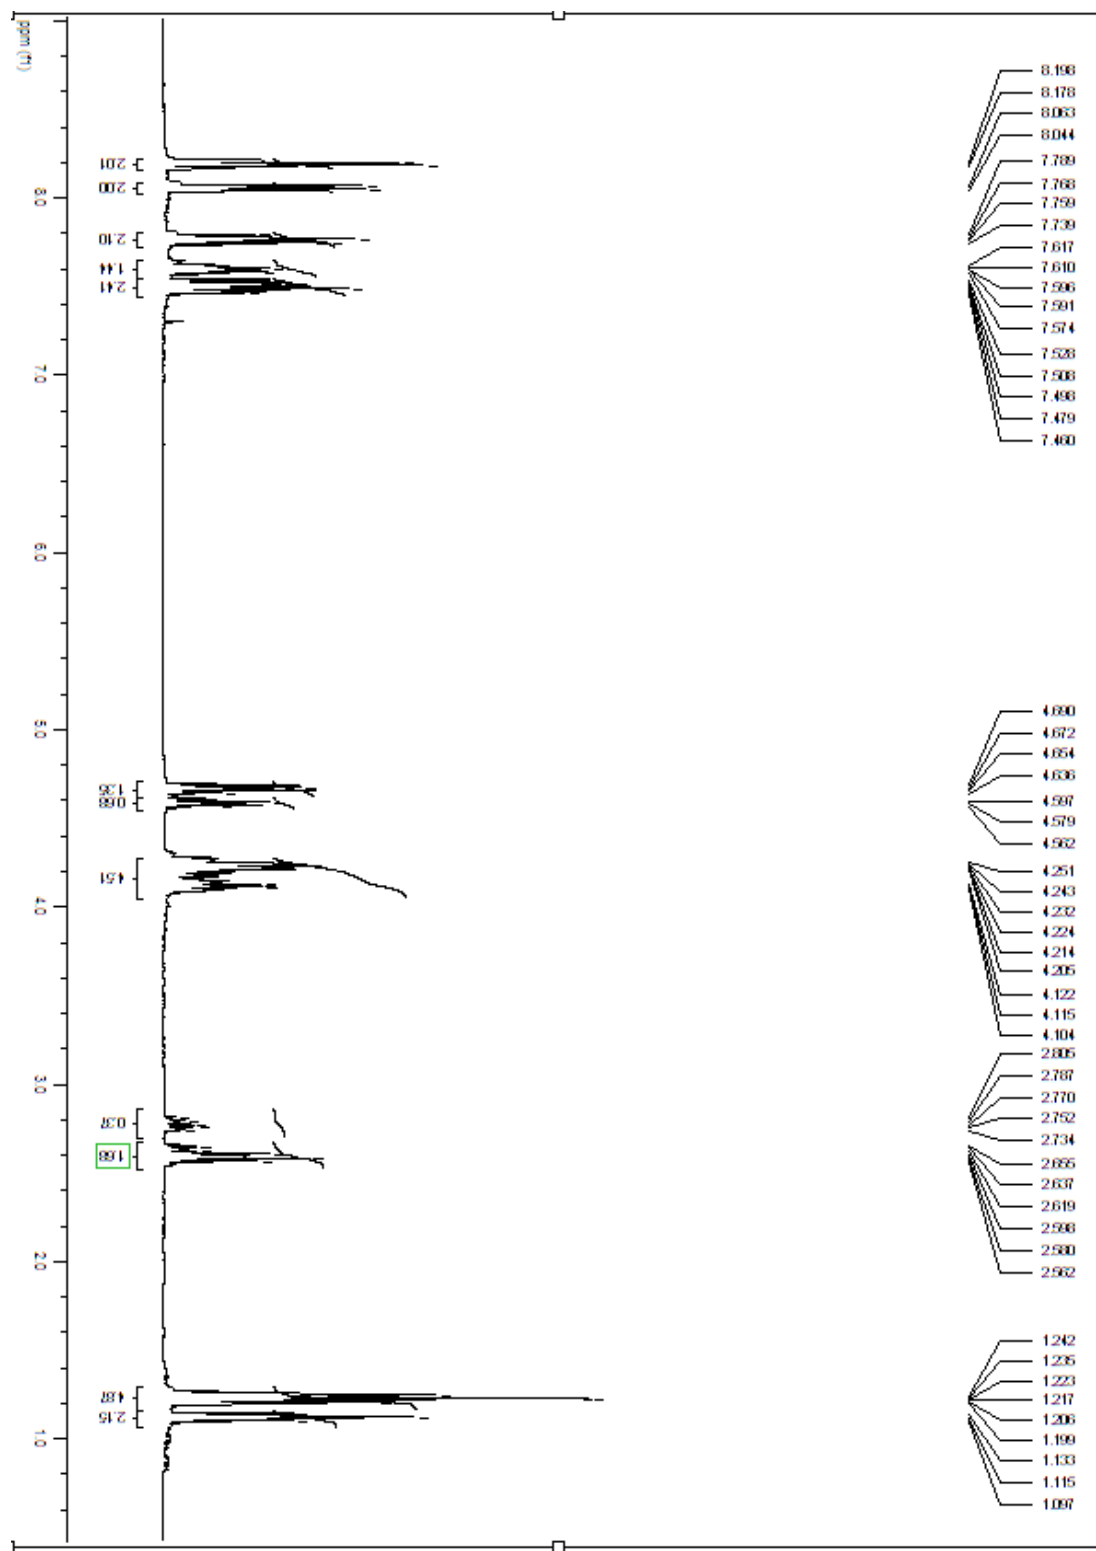

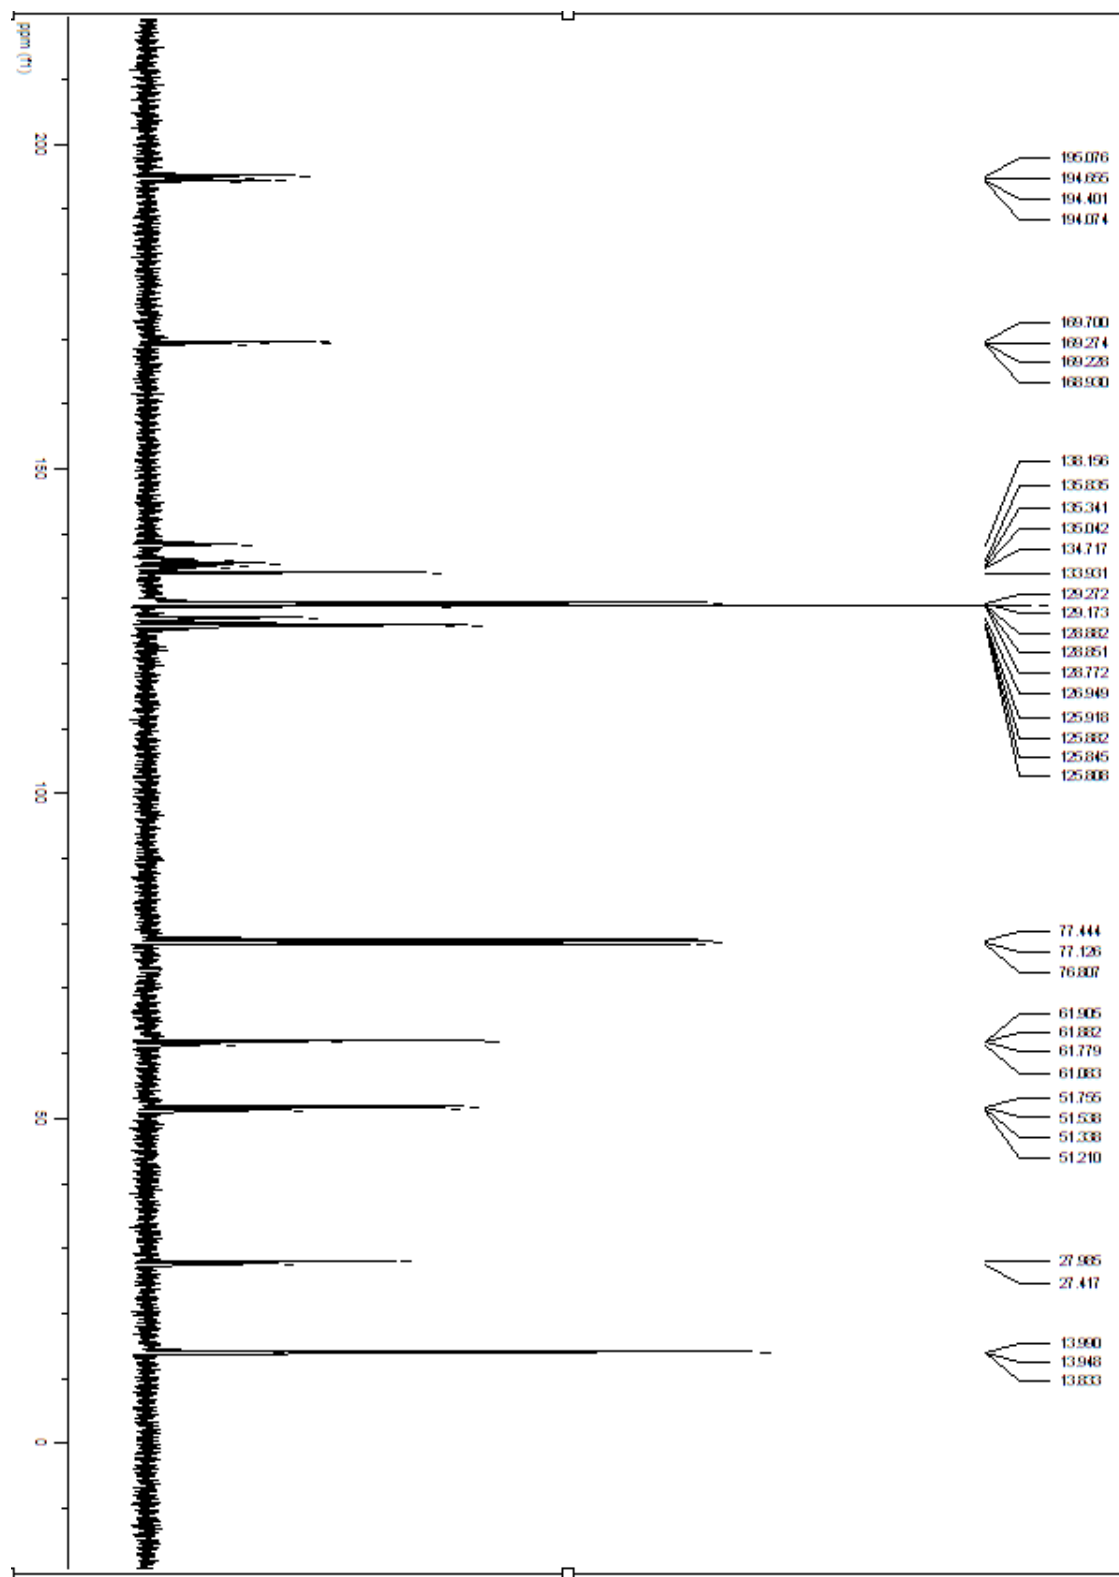

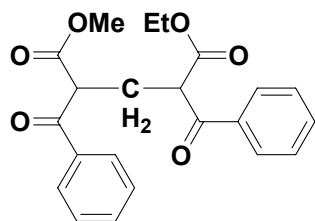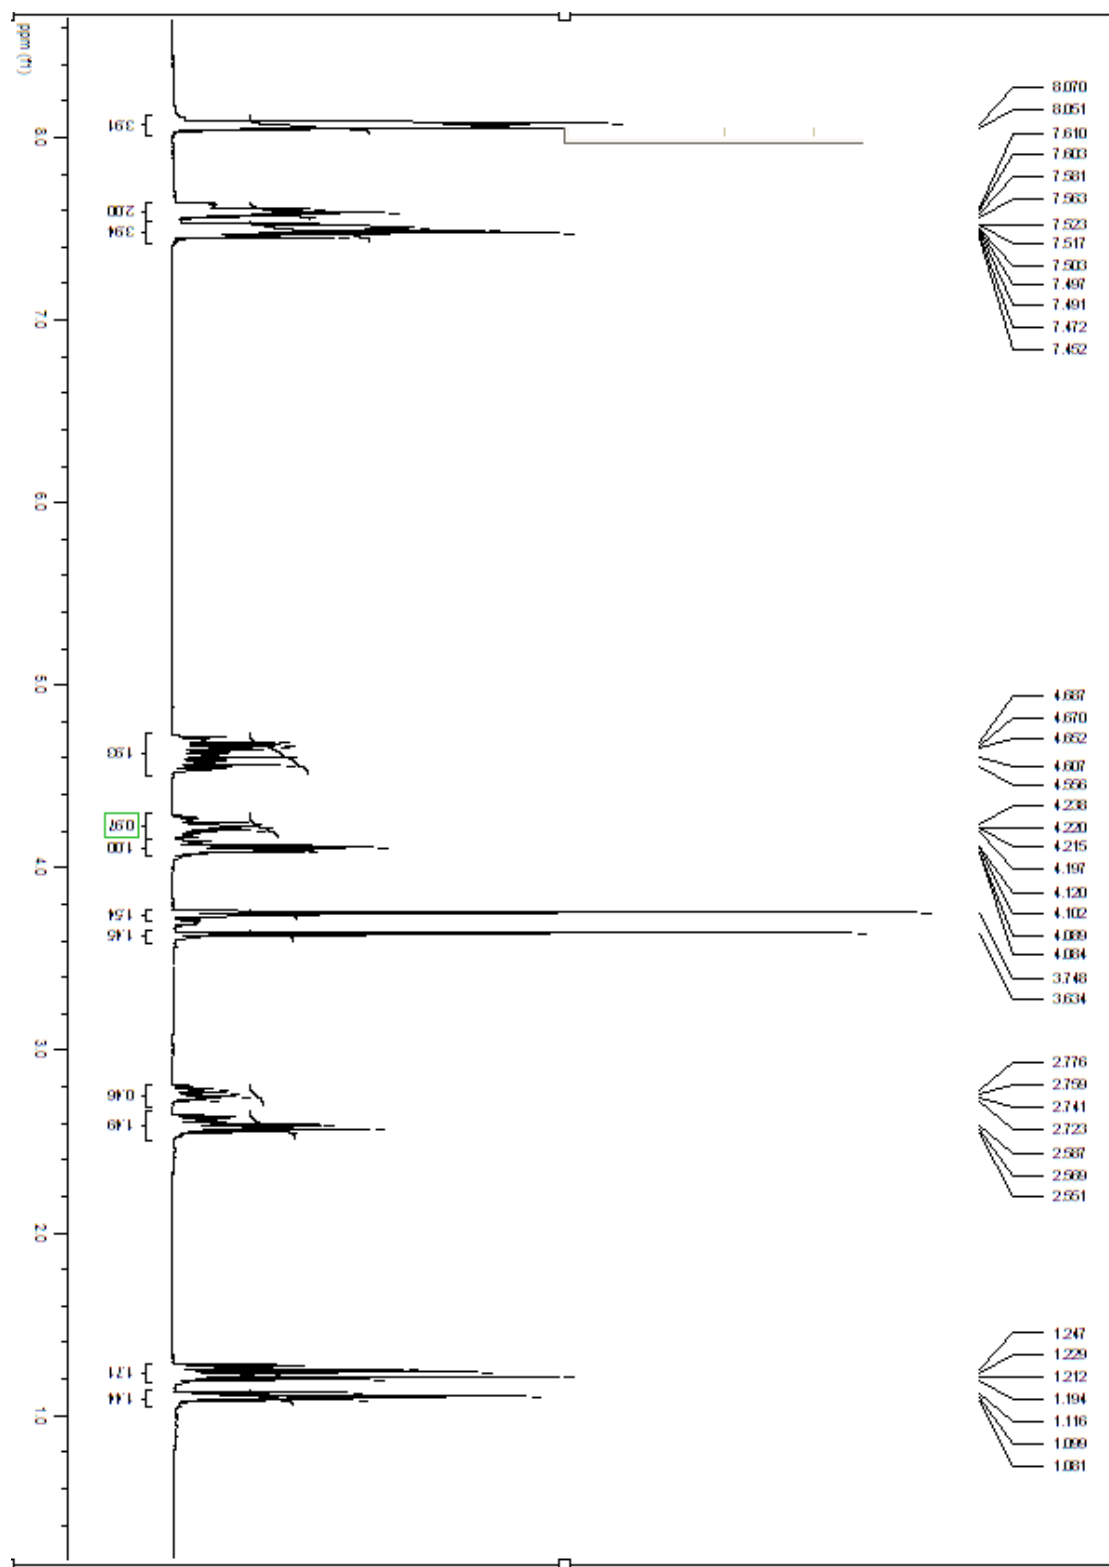

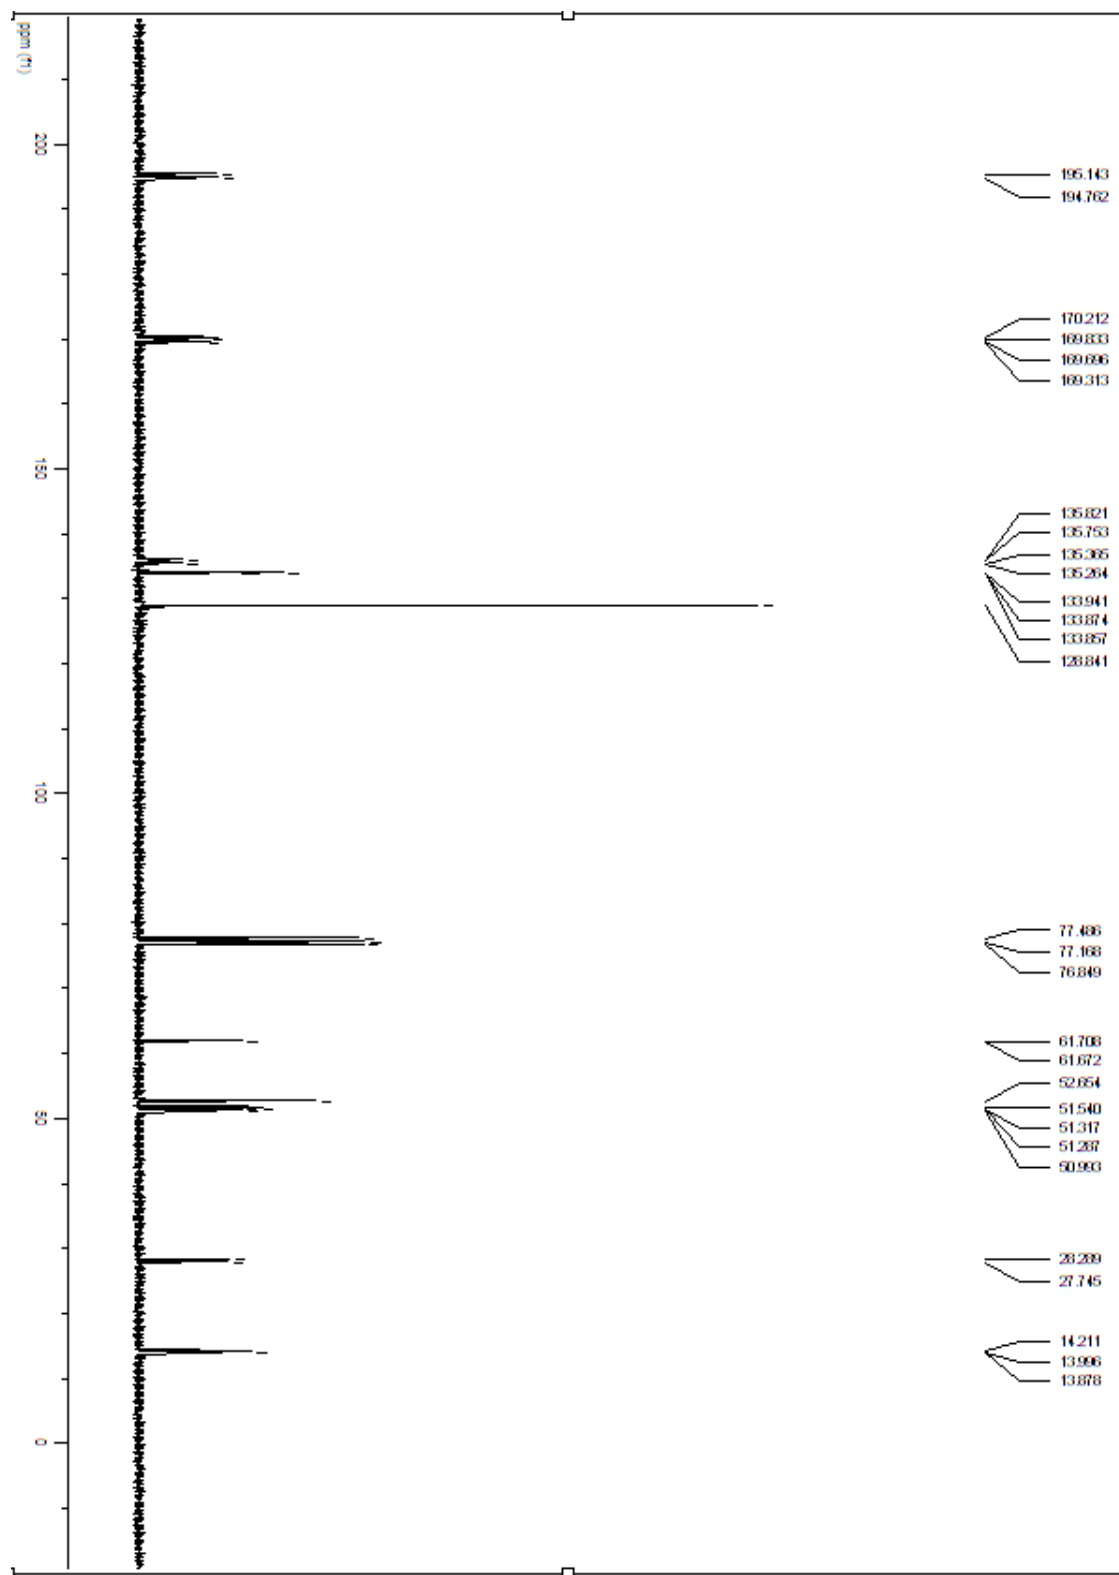



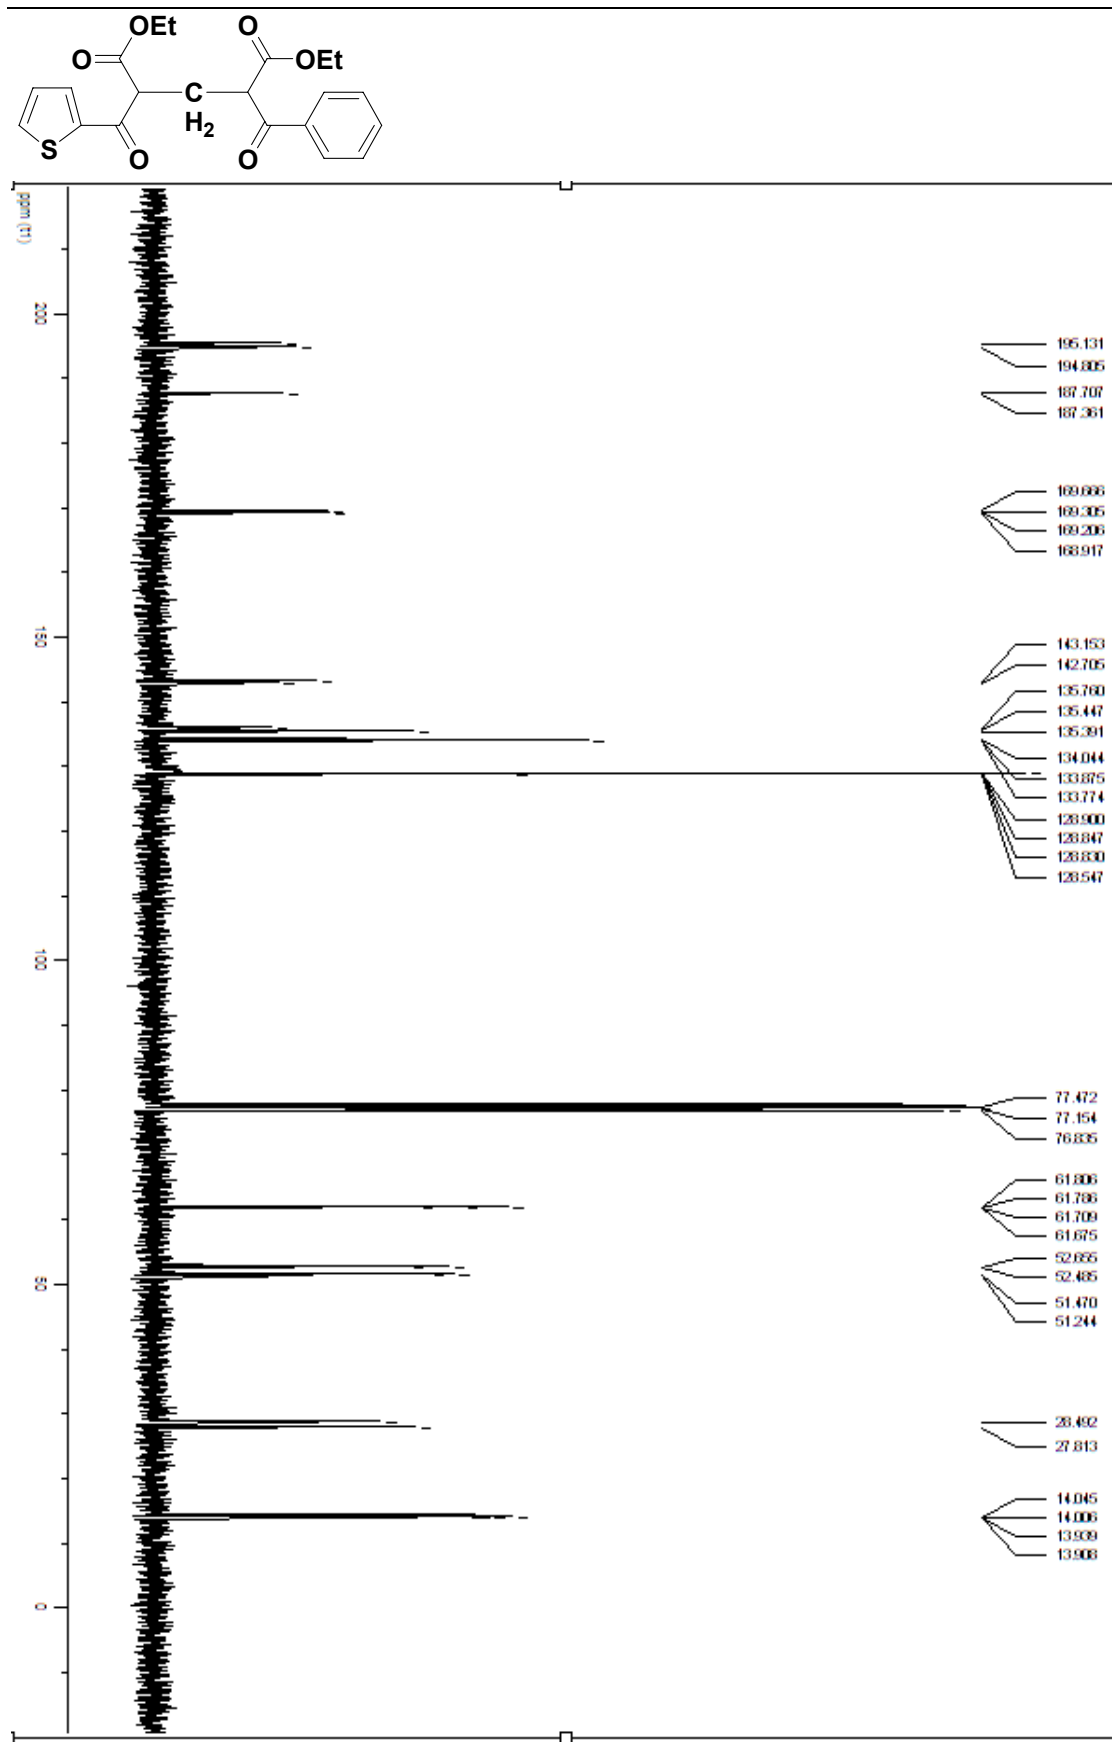



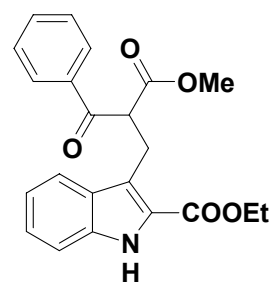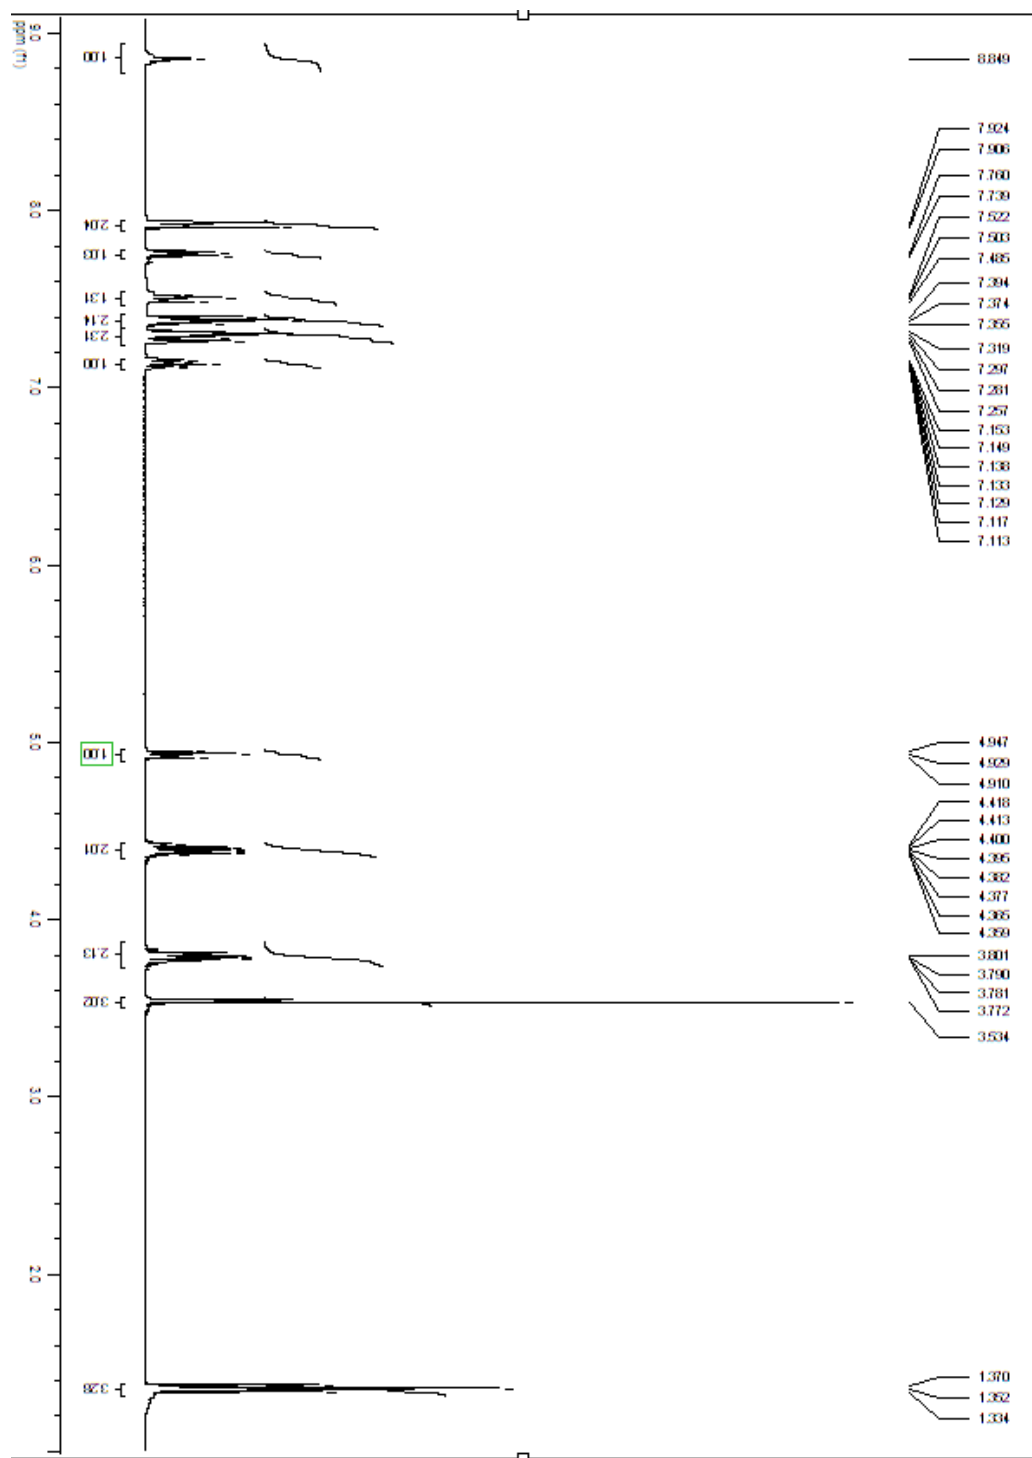

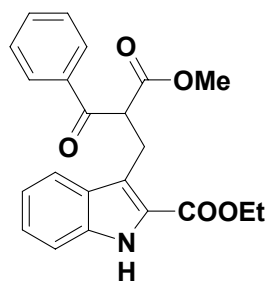

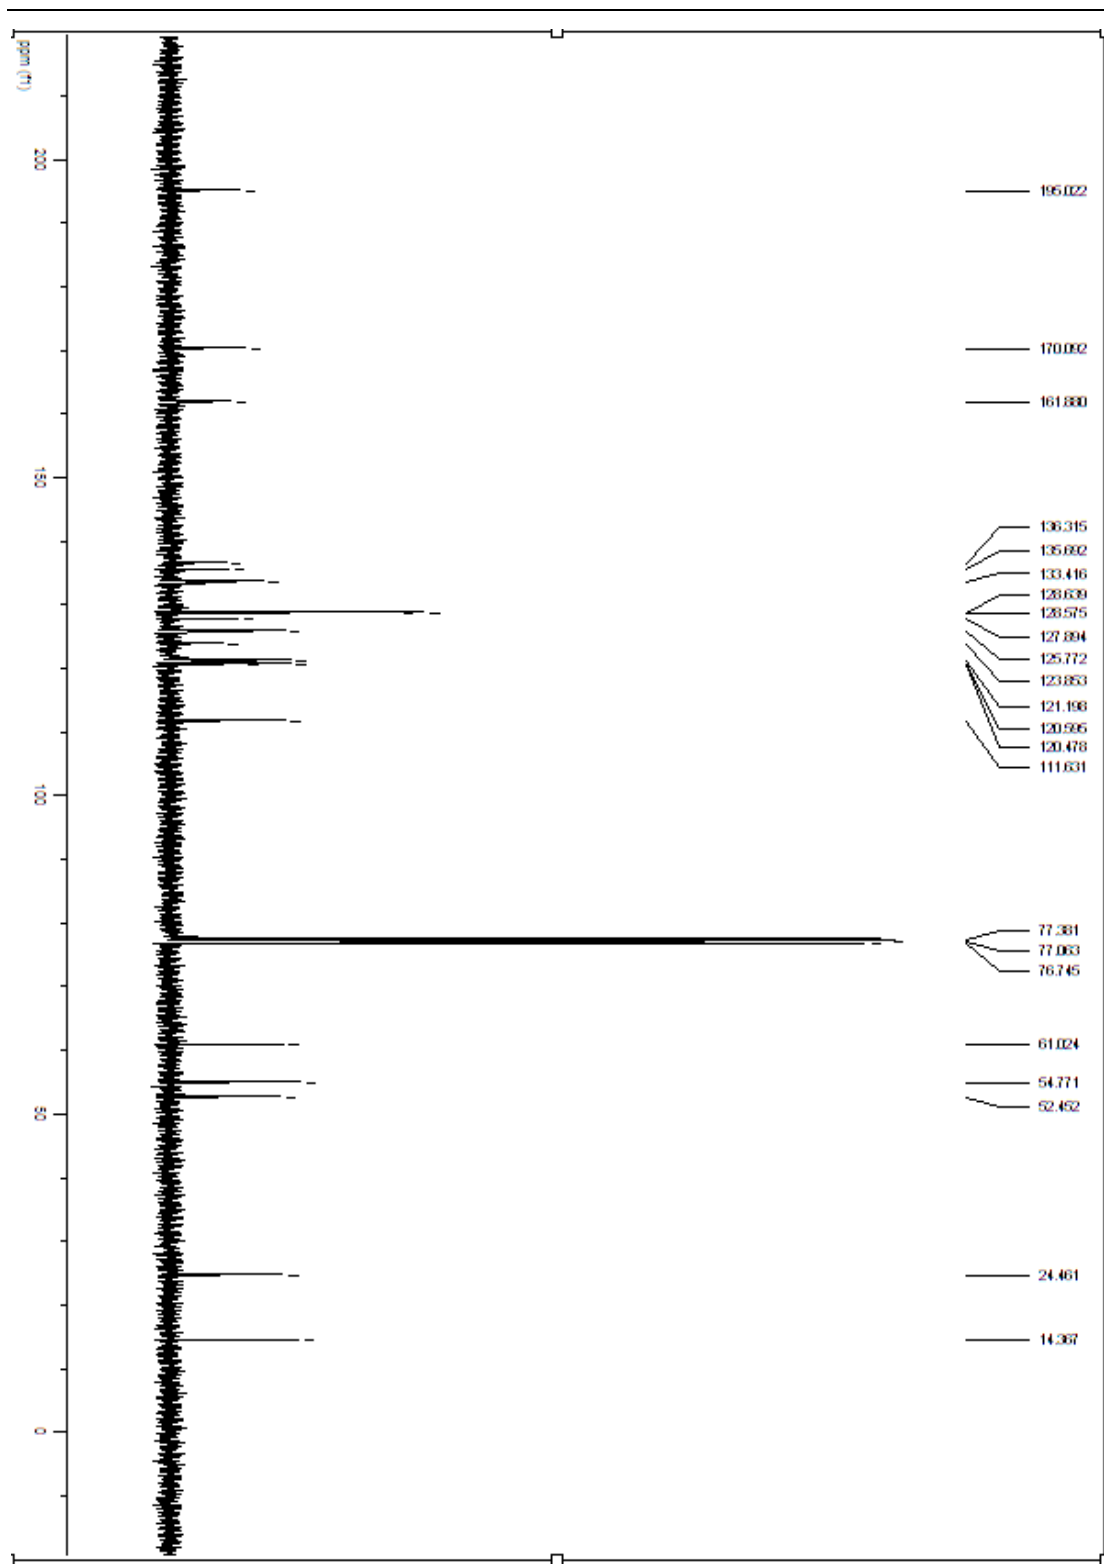

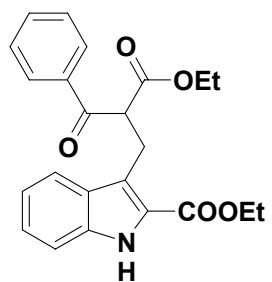

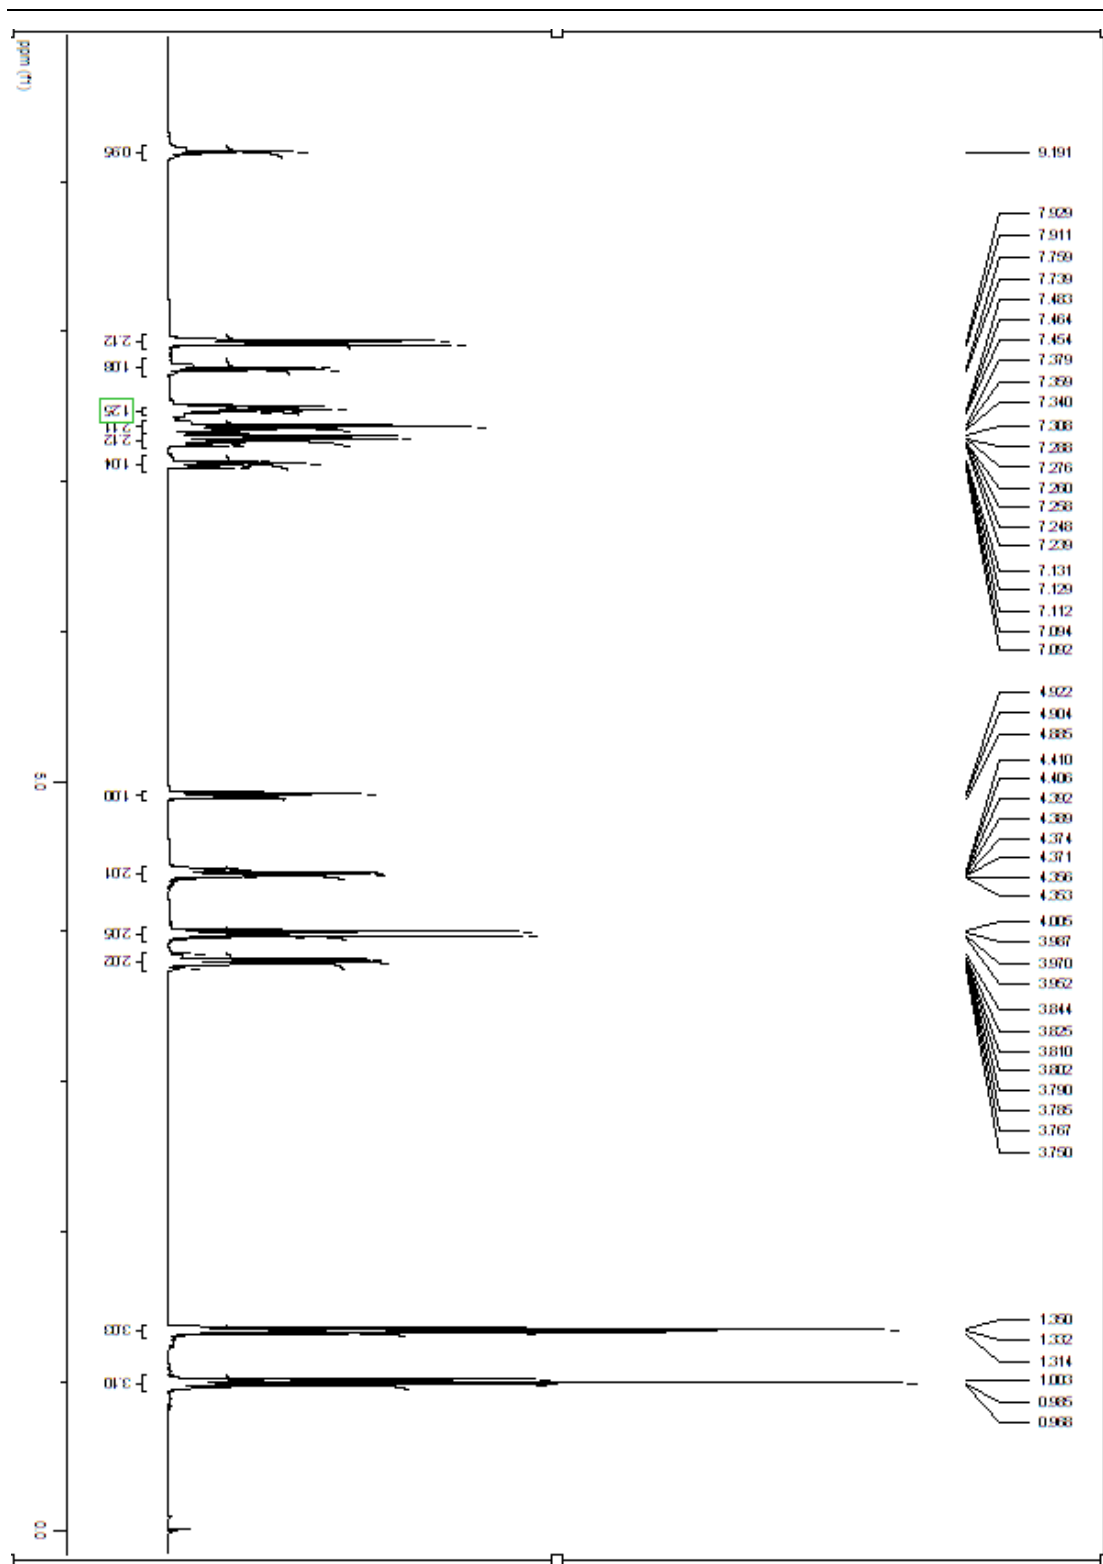



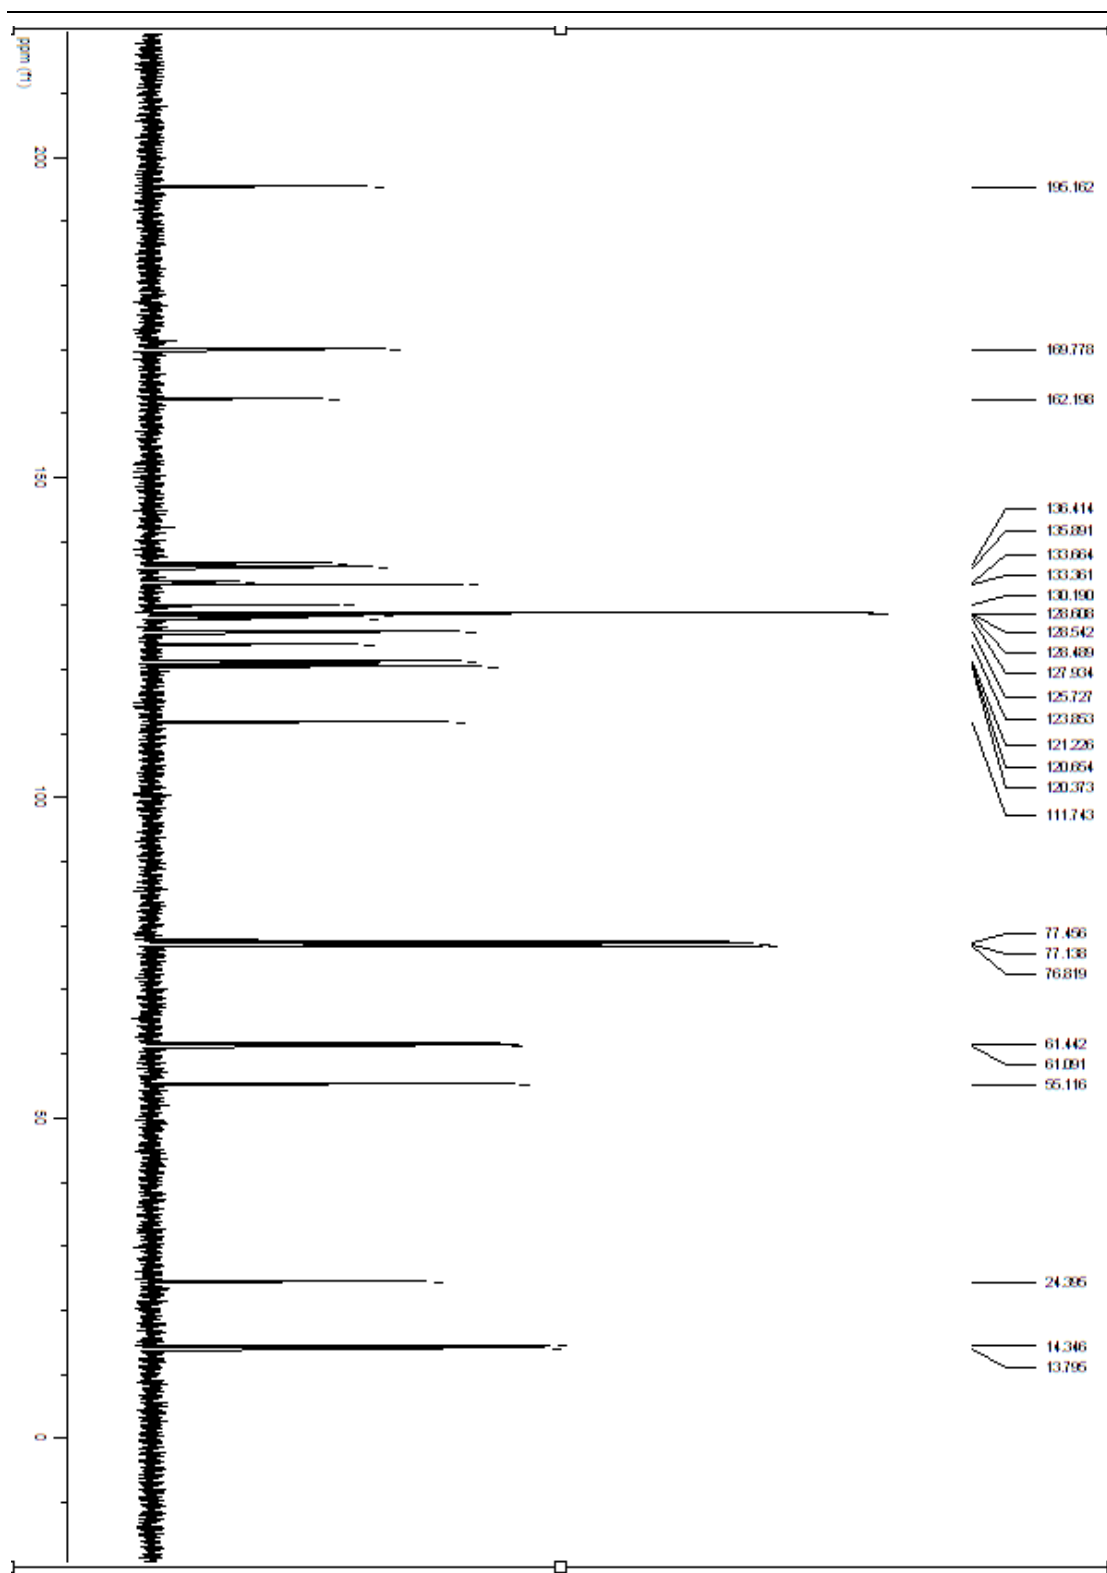

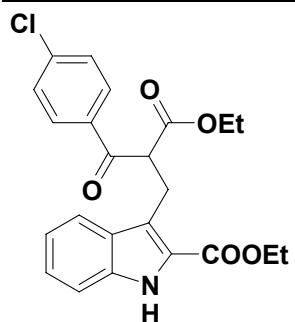



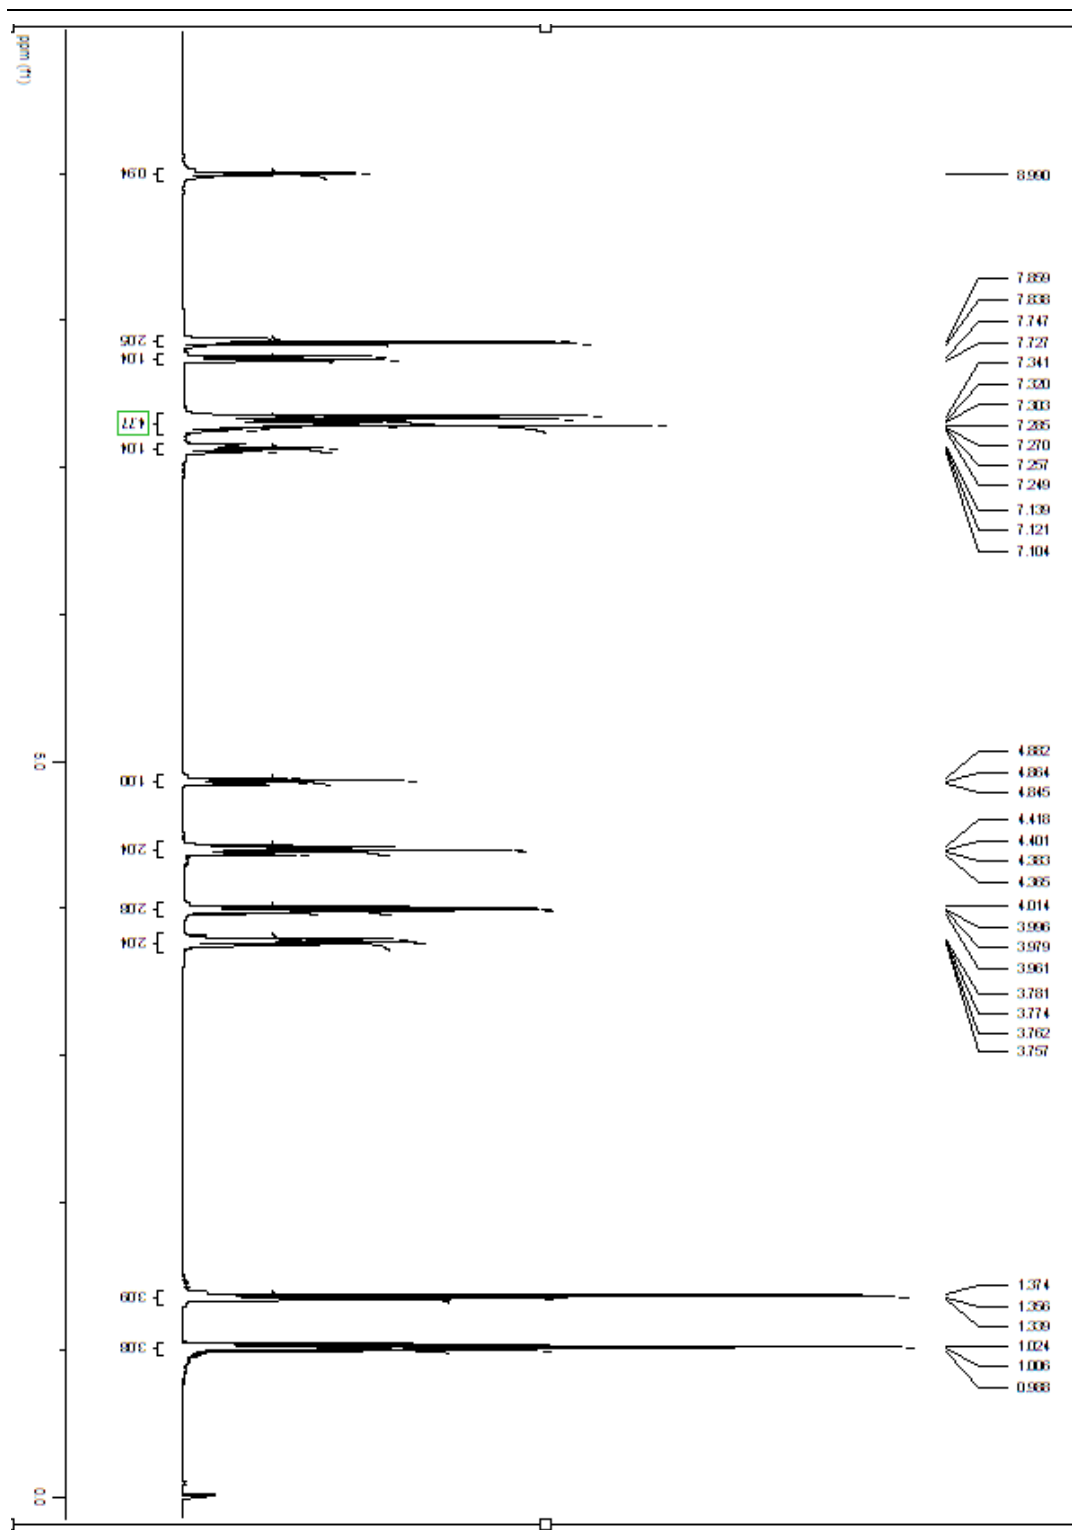

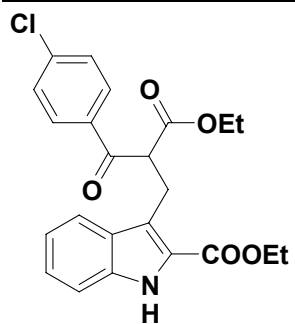

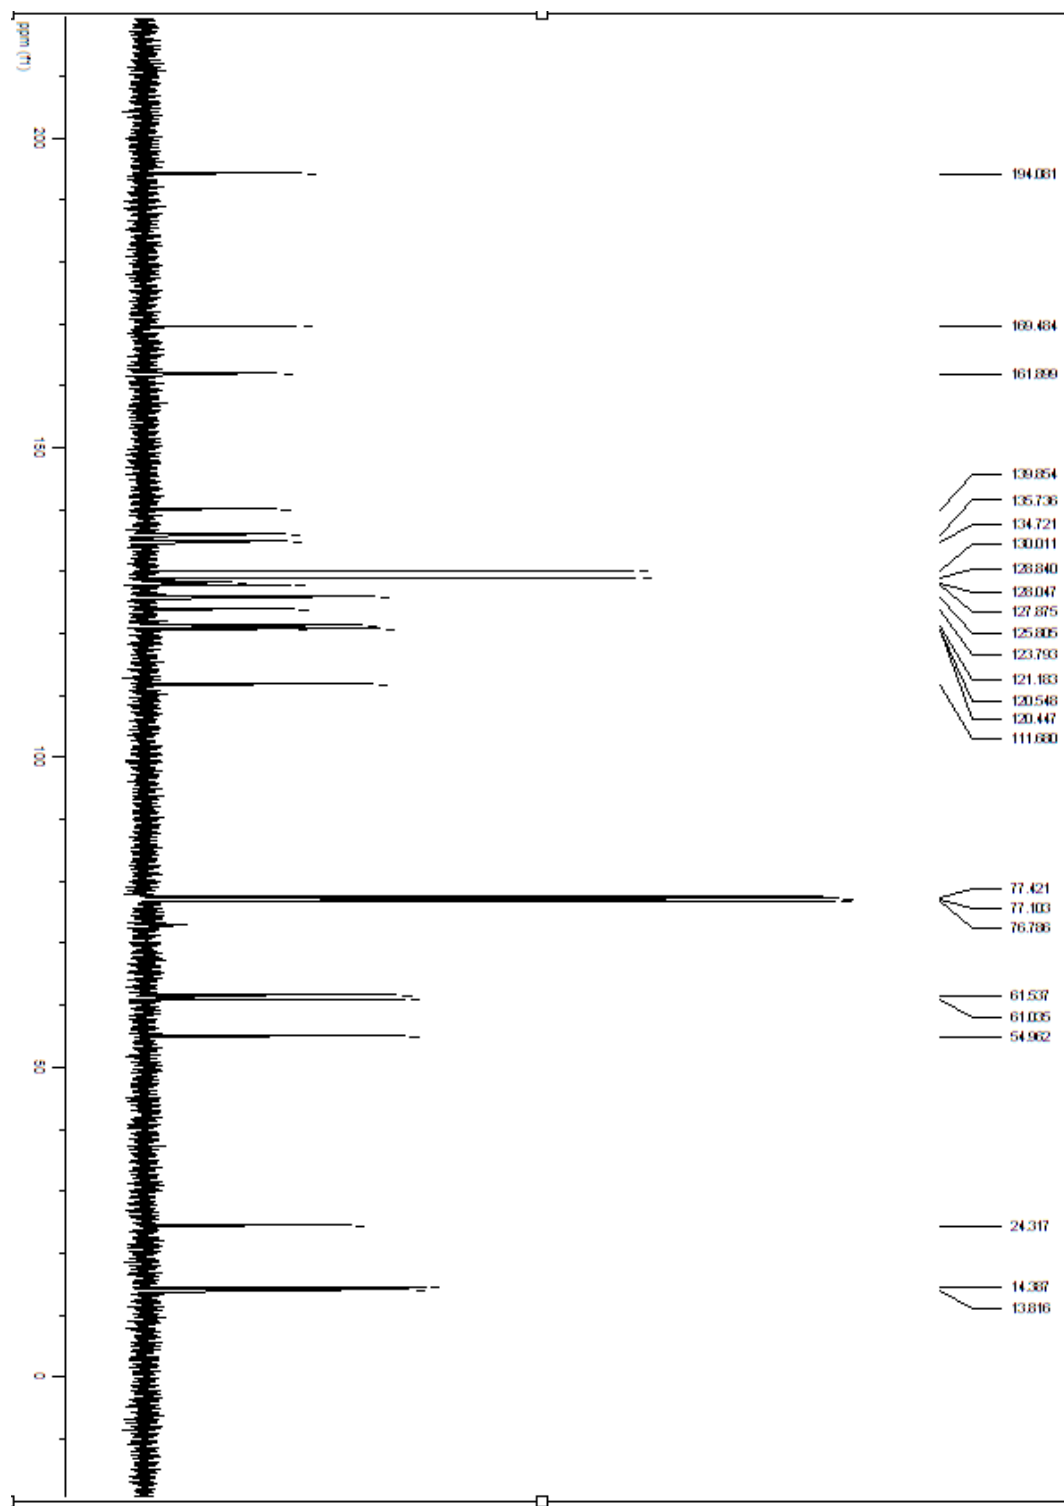

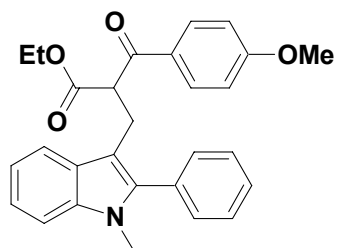

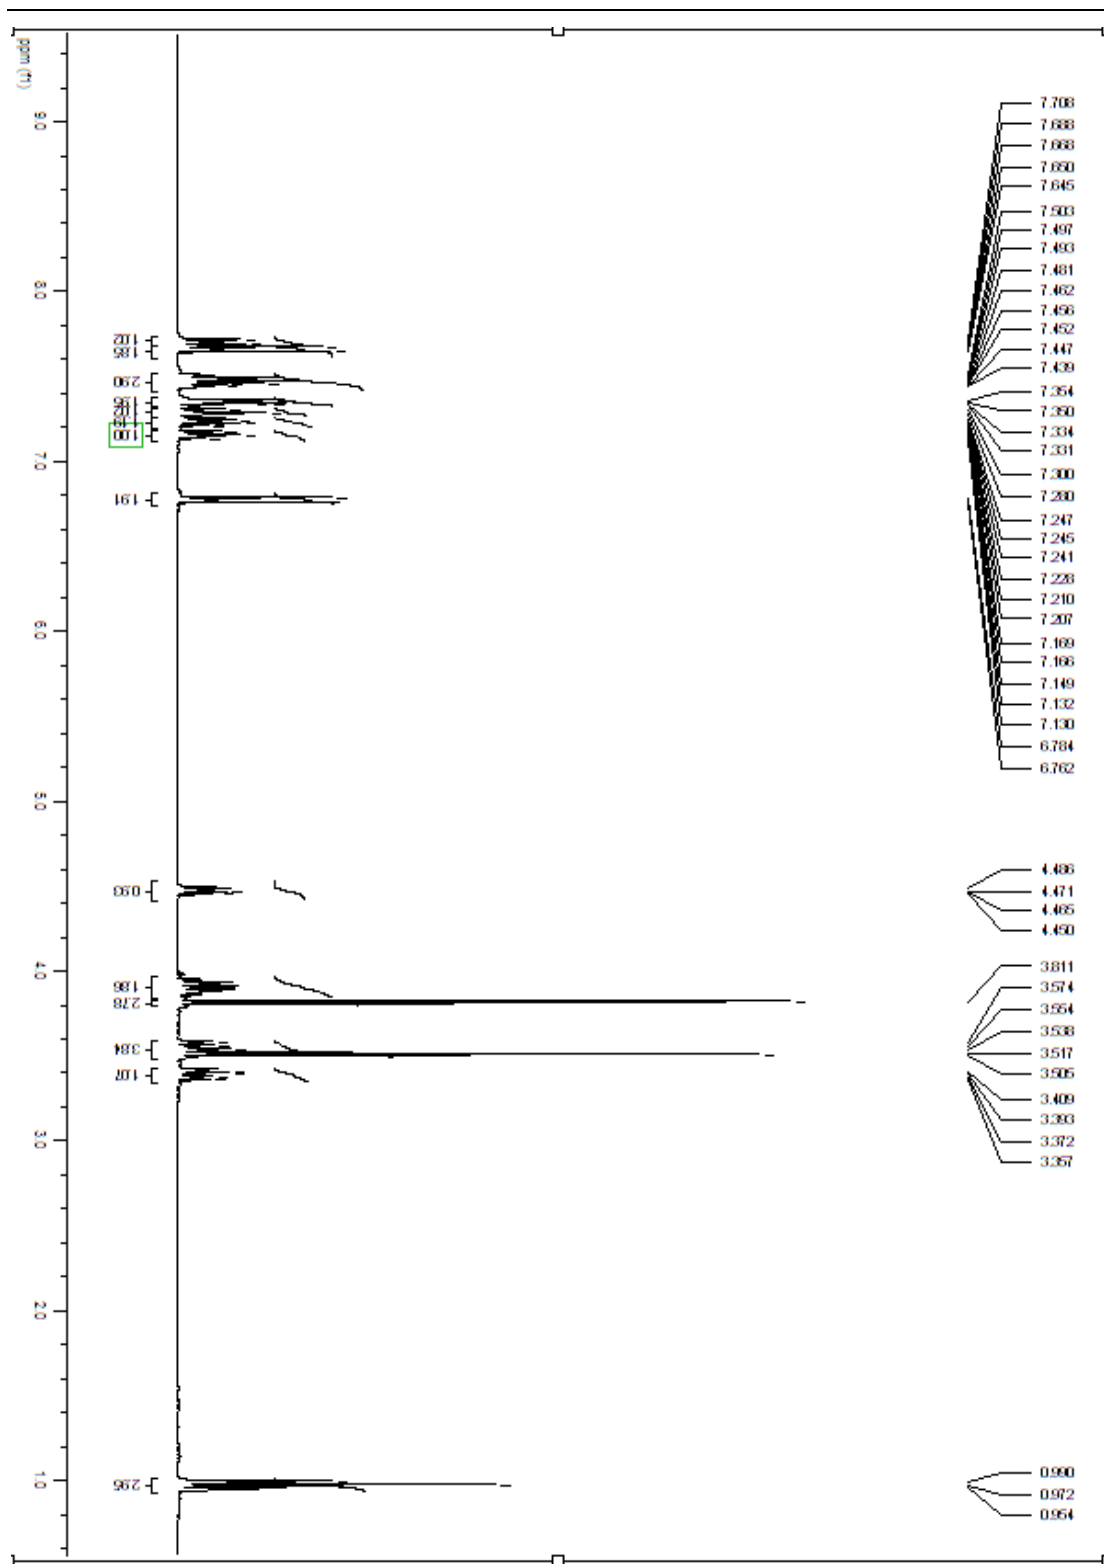



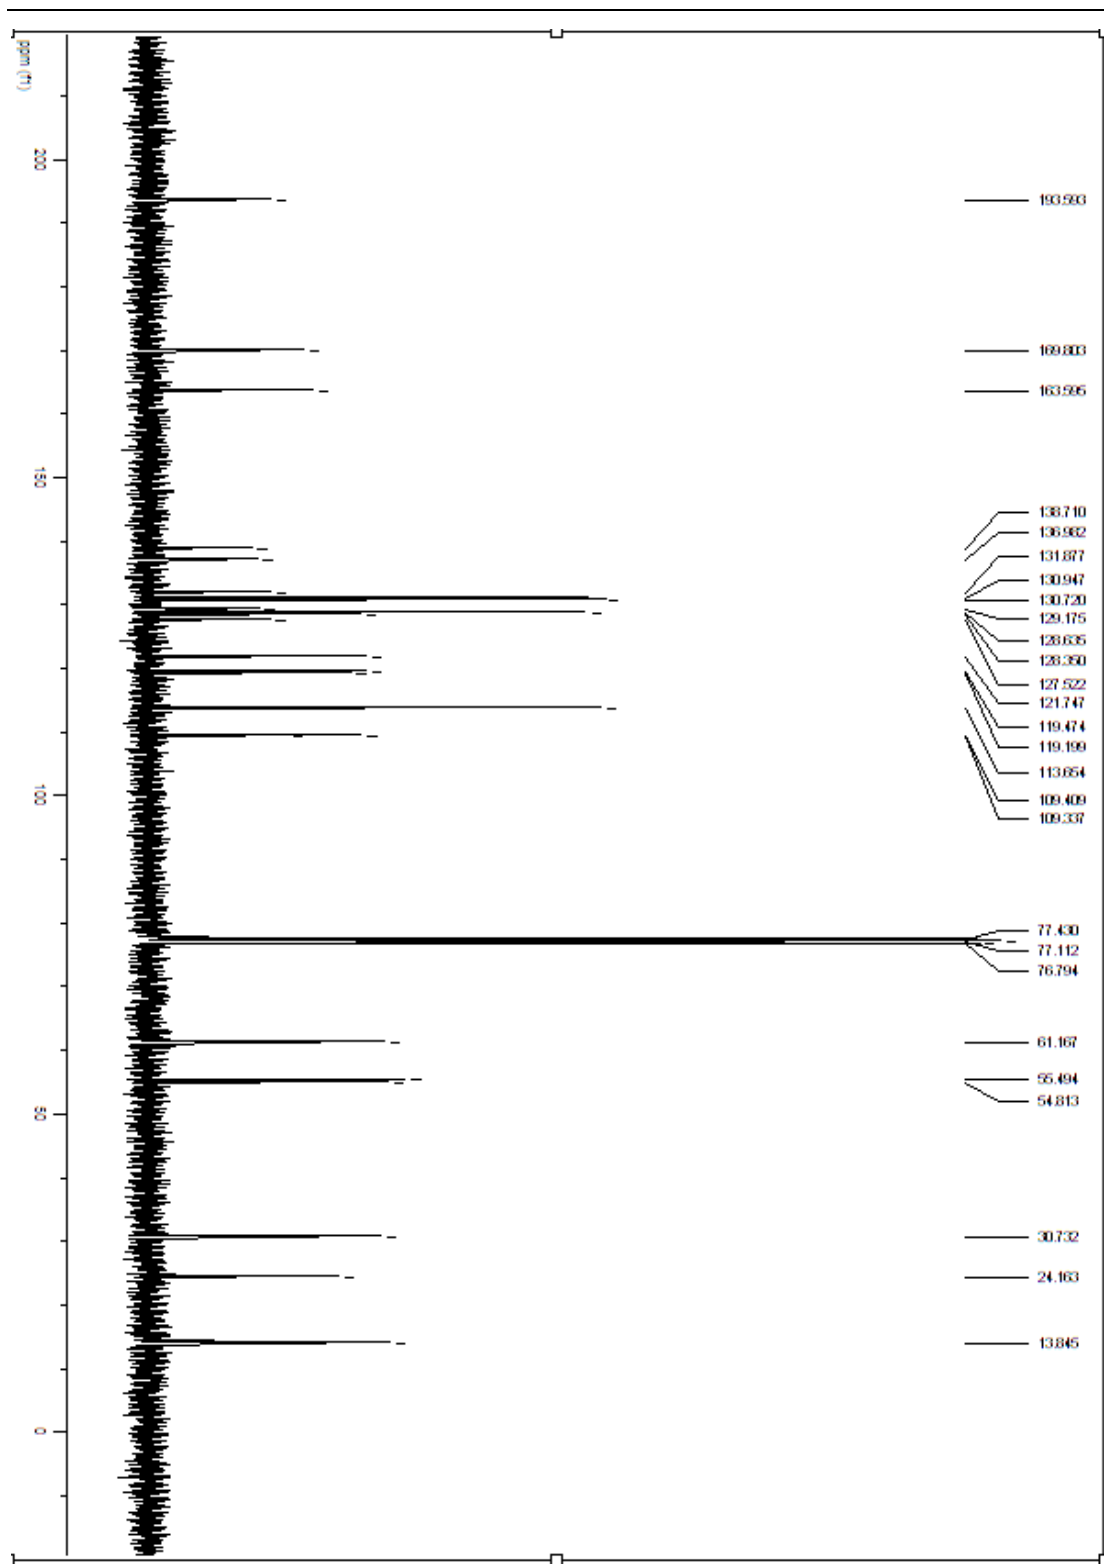

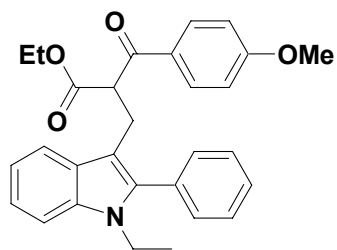



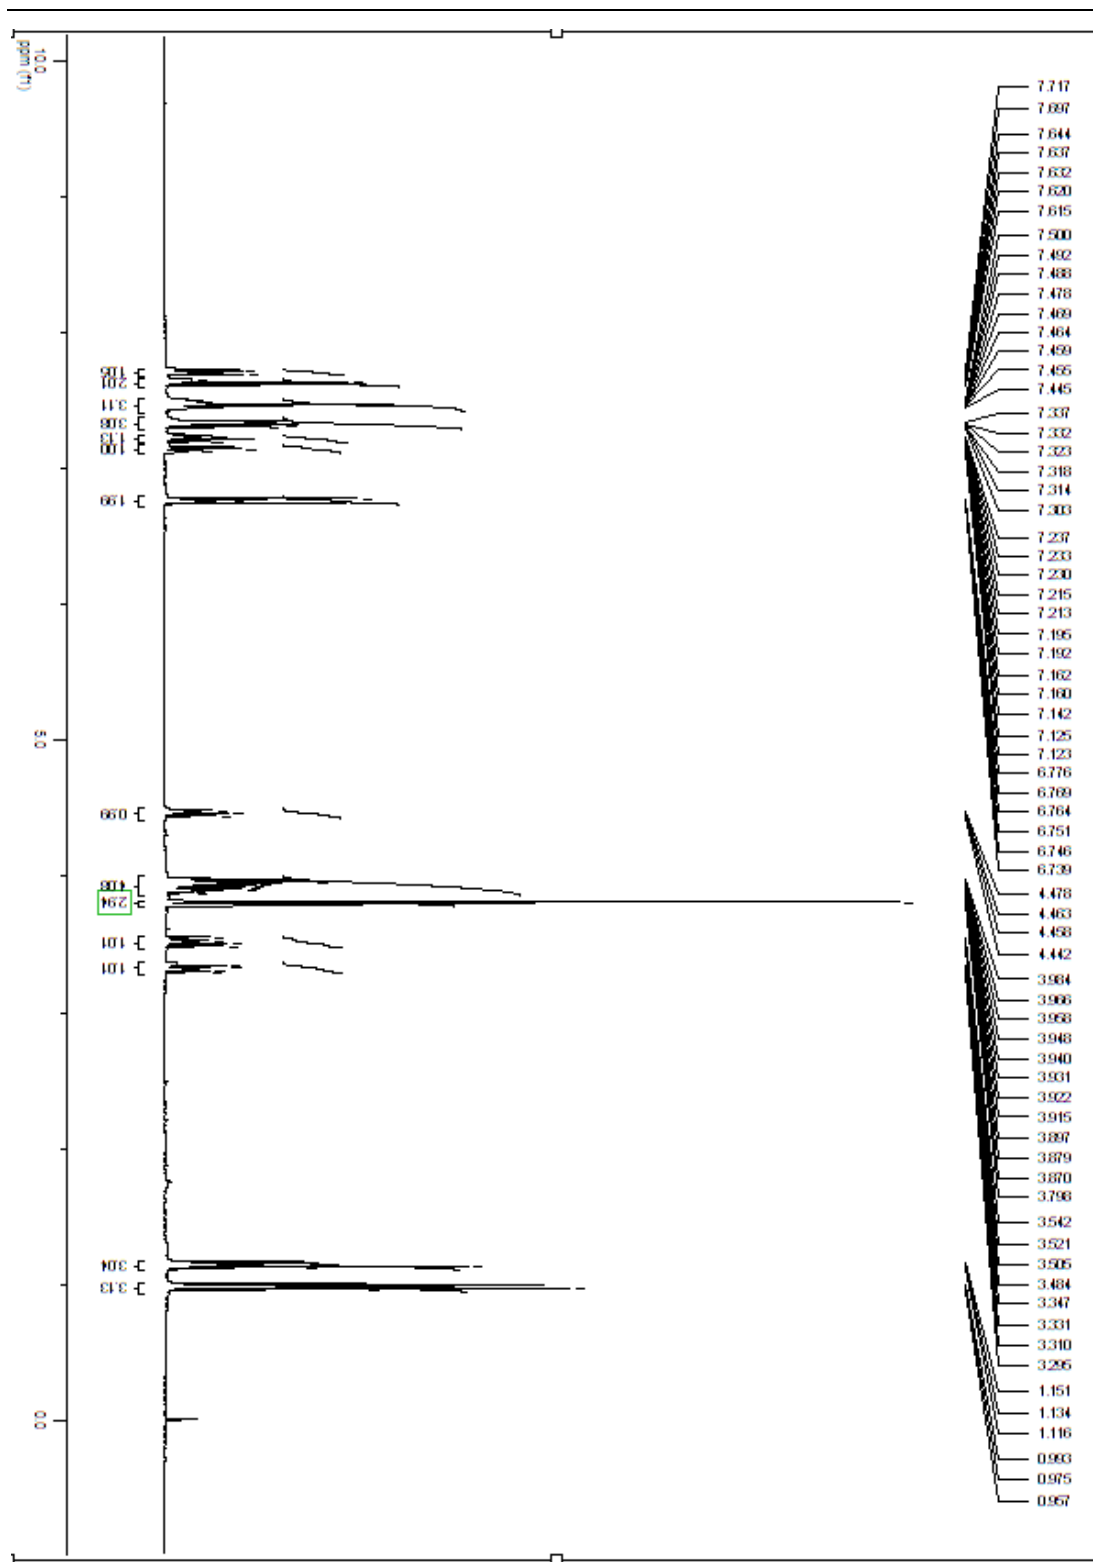



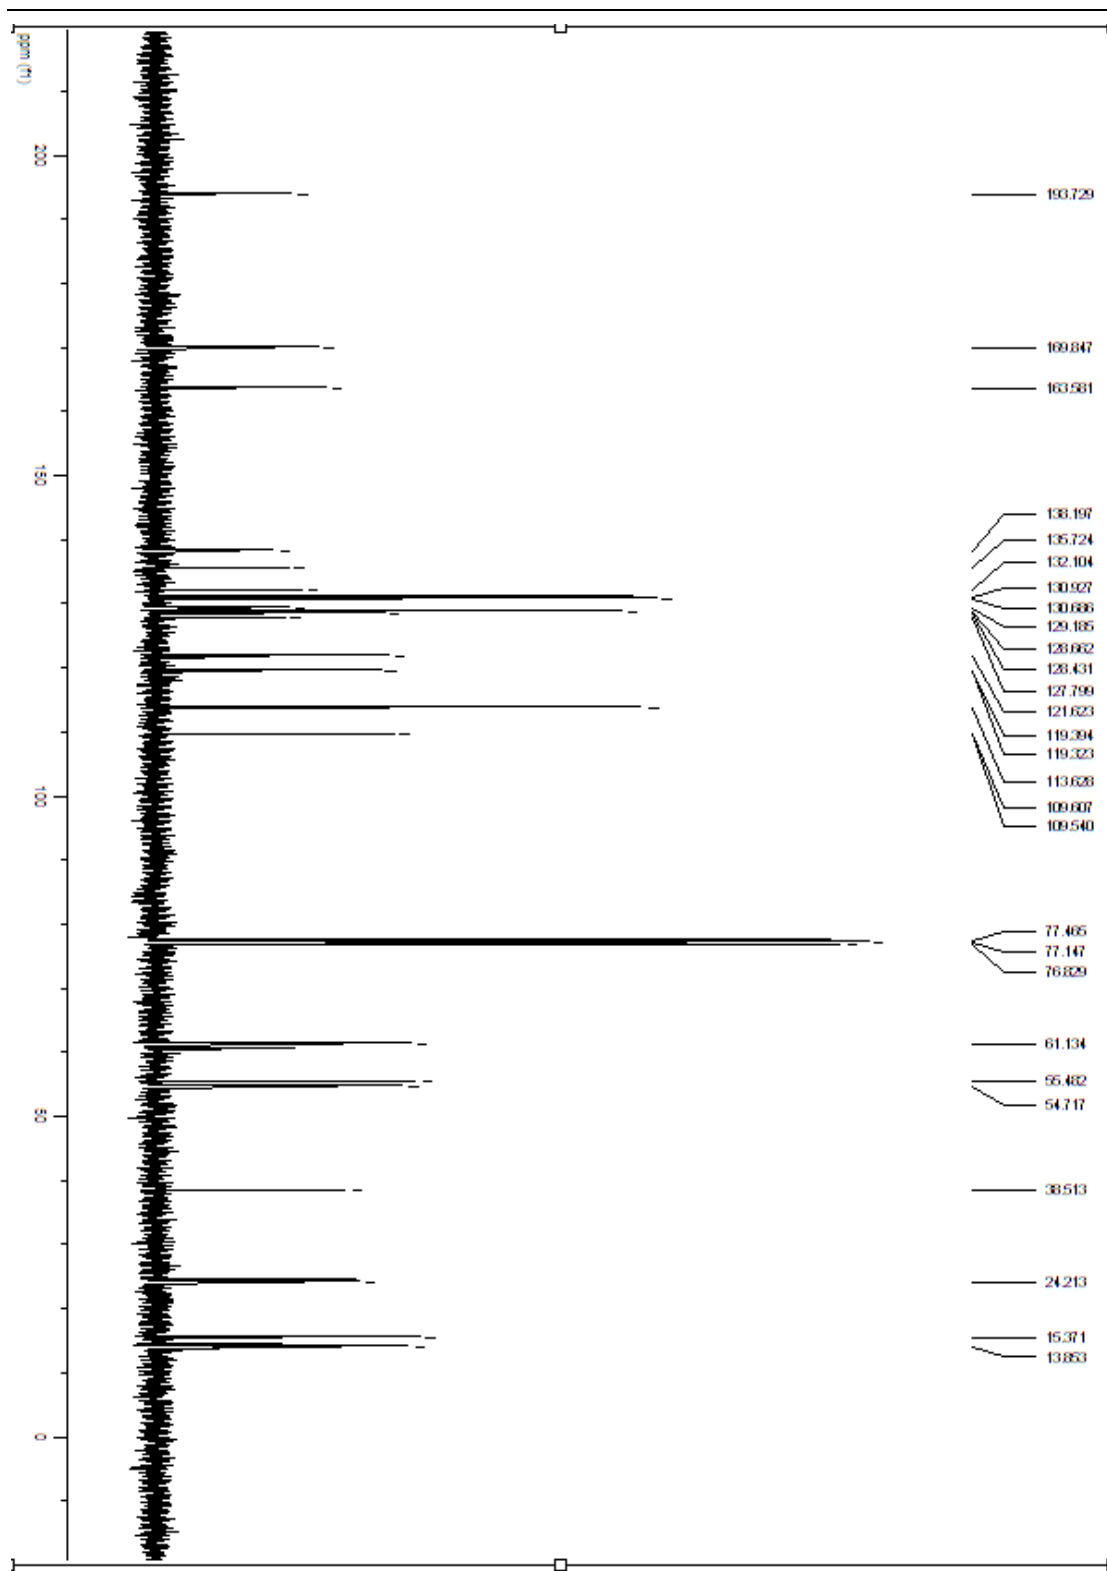

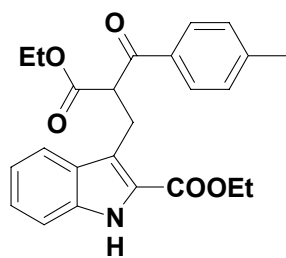

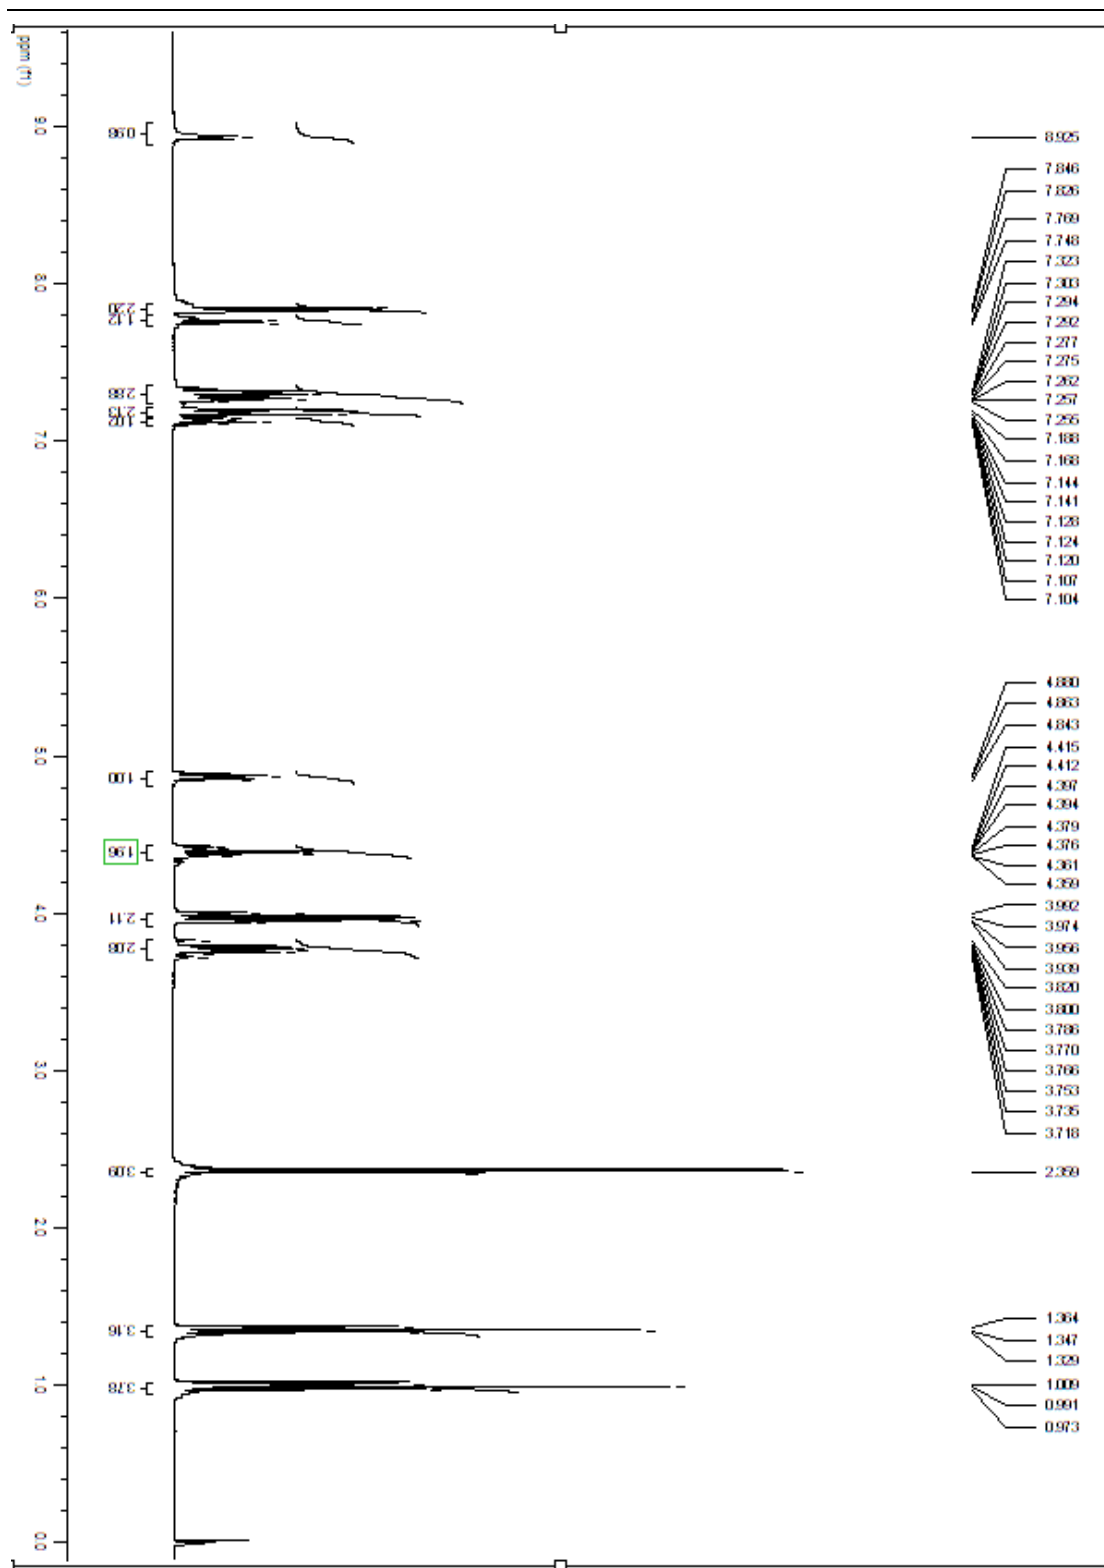



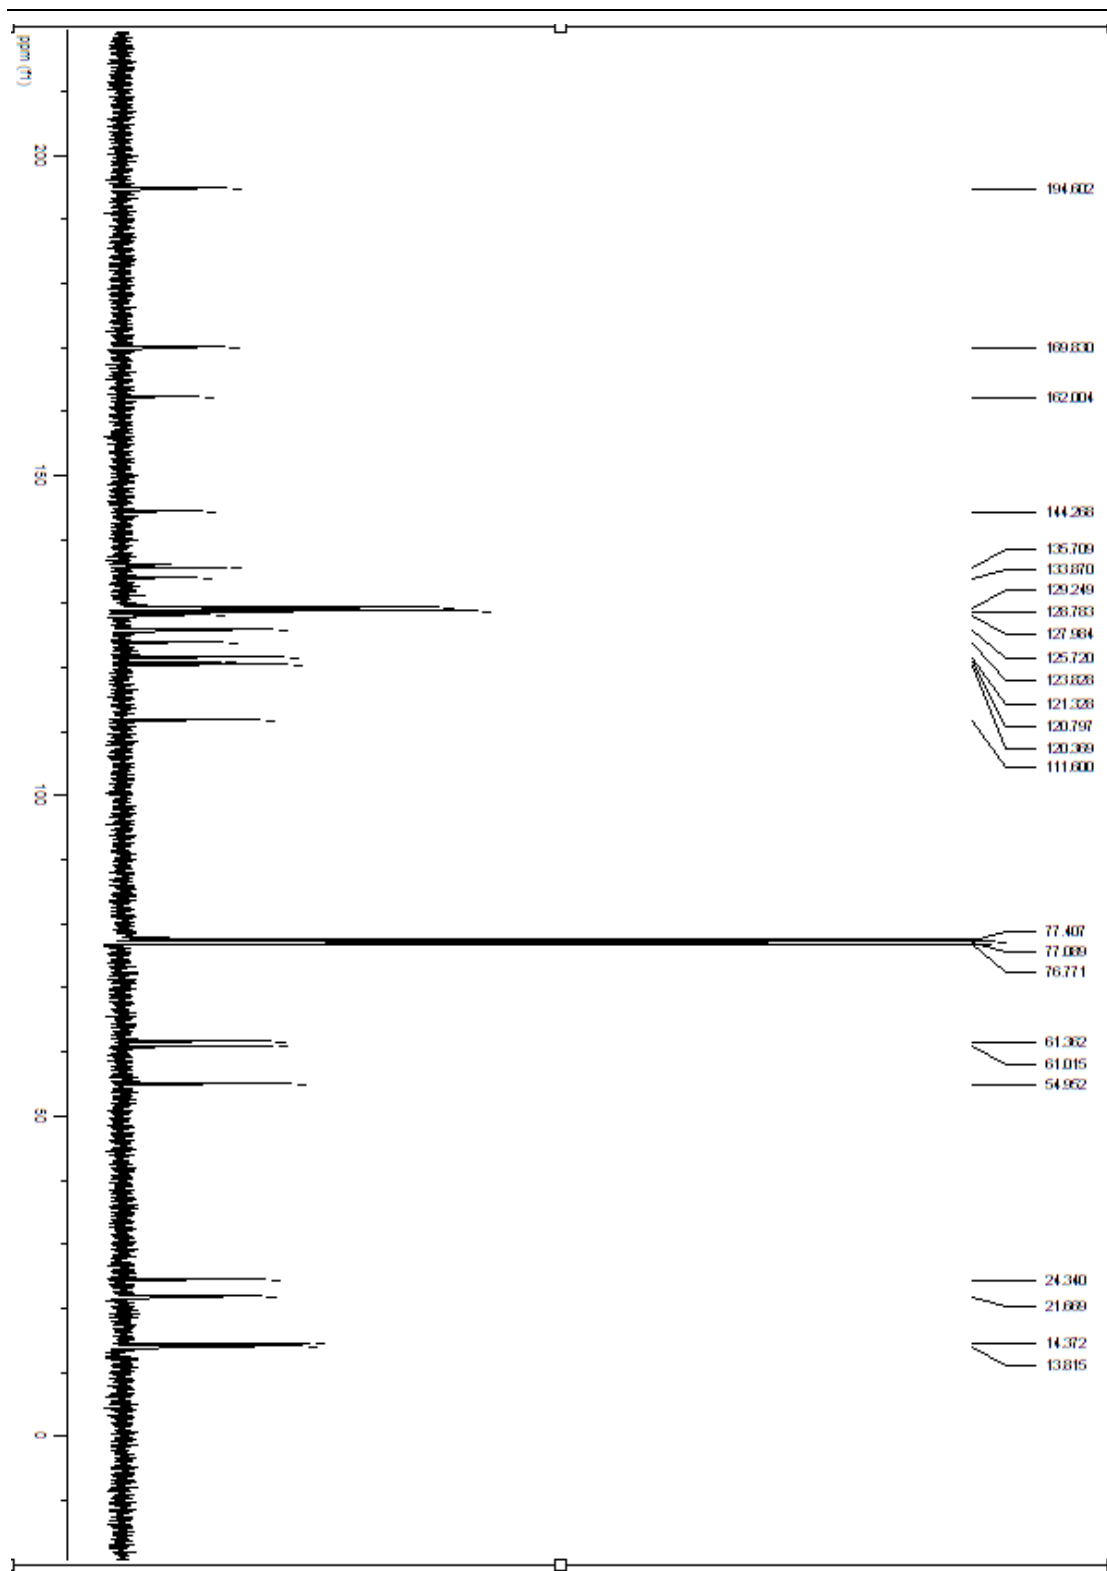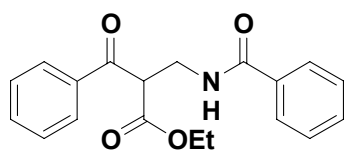

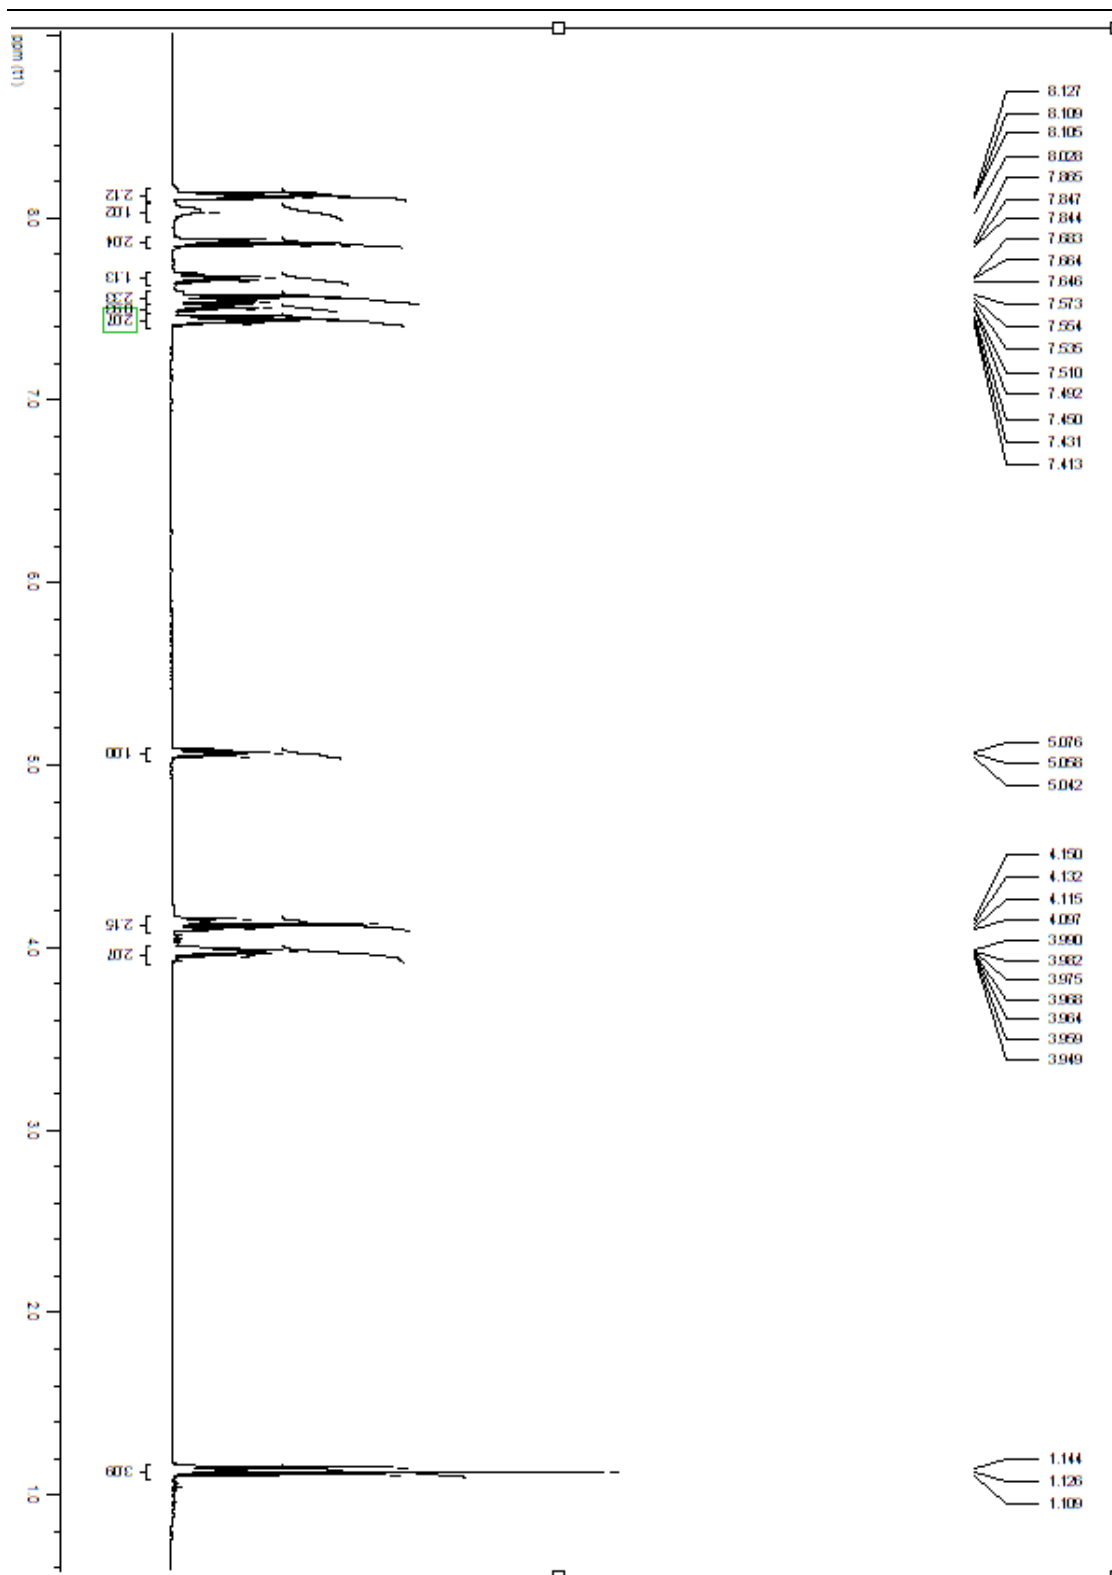



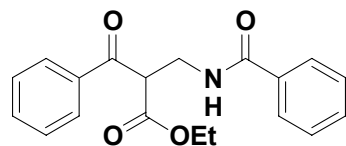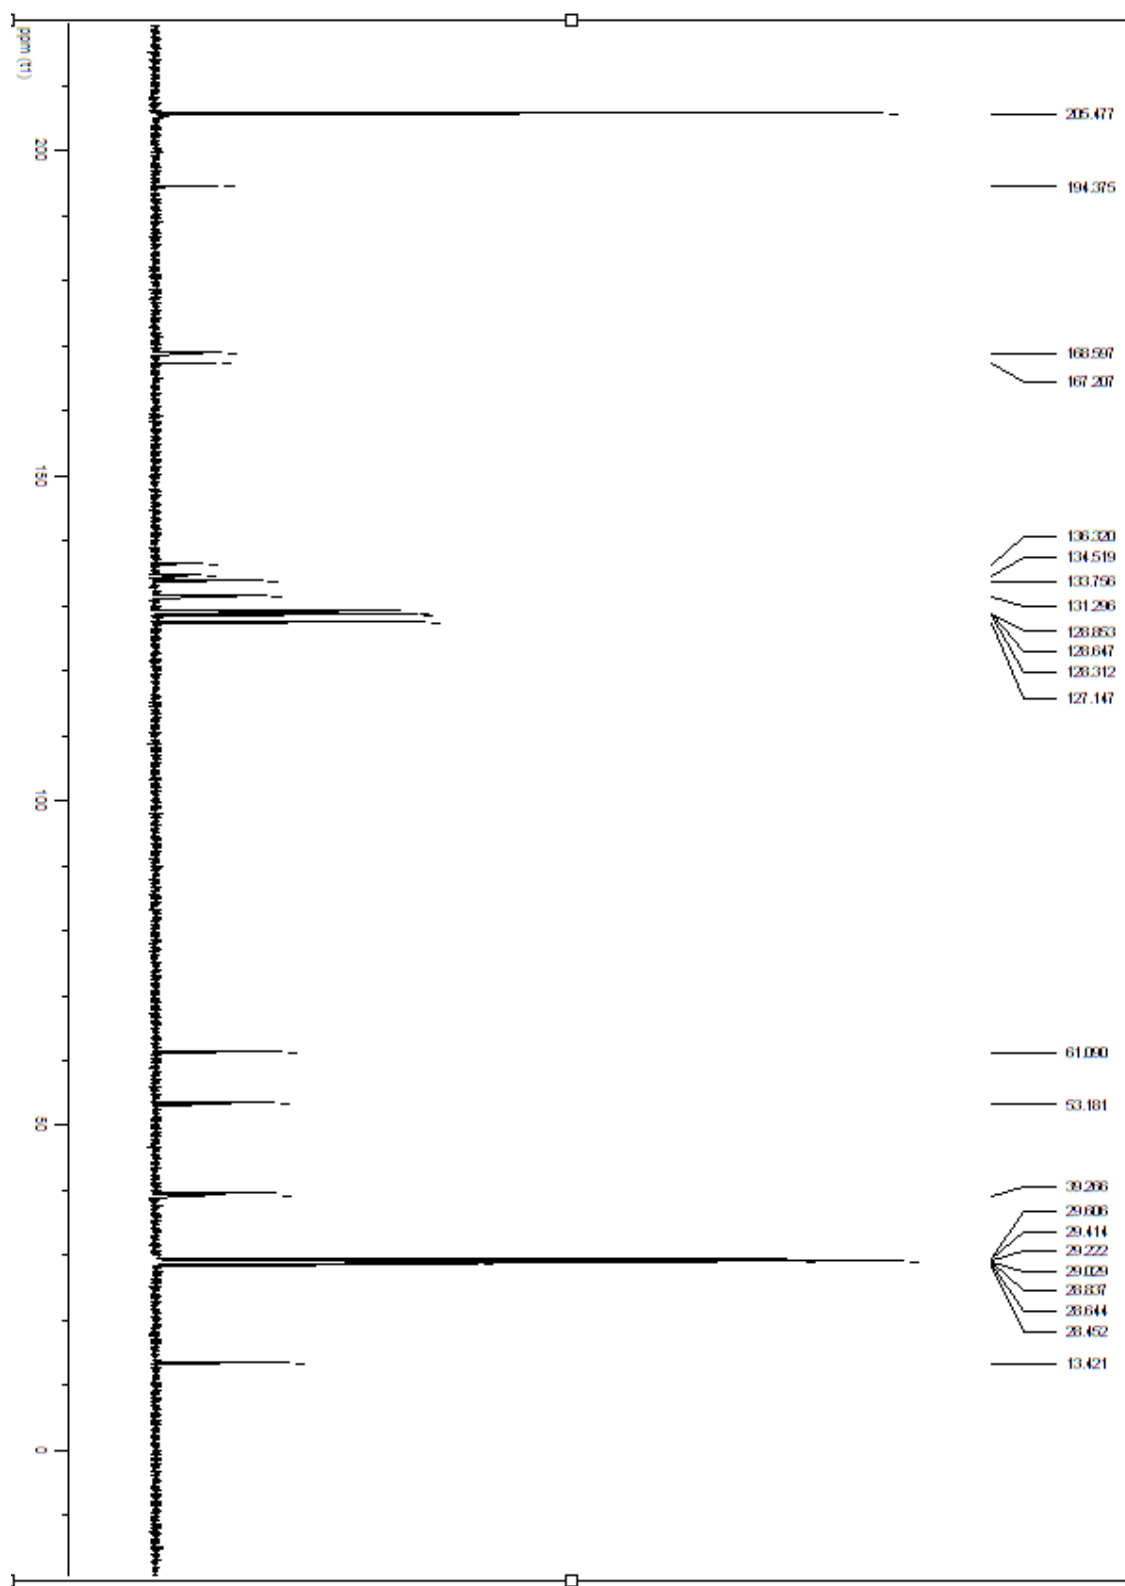

Supplement: c0gc00274g.pdf [file c0gc00274g.pdf]
